# Supplementary material for: Physiologically‐based pharmacokinetic modeling of dextromethorphan to investigate interindividual variability within CYP2D6 activity score groups
Source: PubMed Central journal article supplement — CPT Pharmacometrics Syst Pharmacol. 2022 Mar 8;11(4):494–511. doi: 10.1002/psp4.12776 (PMC9007601; doi:10.1002/psp4.12776), 2022-03-08
Supplement: PSP4-11-494-s001.pdf [file PSP4-11-494-s001.pdf]

# Physiologically Based Pharmacokinetic Modeling of Dextromethorphan to Investigate Interindividual Variability Within CYP2D6 Activity Score Groups

Supplement S1 - Model Information and Evaluation

Simeon Rüdesheim<sup>1,2</sup>, Dominik Selzer<sup>1</sup>, Uwe Fuhr<sup>3</sup>, Matthias Schwab<sup>2,4,5</sup>, Thorsten Lehr<sup>1</sup>

<sup>1</sup> Clinical Pharmacy, Saarland University, Saarbrücken, Germany

<sup>2</sup> Dr. Margarete Fischer-Bosch-Institute of Clinical Pharmacology, Stuttgart, Germany

<sup>3</sup> Department I of Pharmacology, Center for Pharmacology, Faculty of Medicine and University Hospital Cologne, University of Cologne, Germany

<sup>4</sup> Departments of Clinical Pharmacology, Pharmacy and Biochemistry, University of Tübingen, Tübingen, Germany

<sup>5</sup> Cluster of Excellence iFIT (EXC2180) "Image-guided and Functionally Instructed Tumor Therapies", University of Tübingen, Tübingen, Germany

## Funding

M.S. was supported by the Robert Bosch Stiftung (Stuttgart, Germany), the European Commission Horizon 2020 UPGx grant 668353, a grant from the German Federal Ministry of Education and Research (BMBF 031L0188D), and the Deutsche Forschungsgemeinschaft (DFG, German Research Foundation) under Germany's Excellence Strategy—EXC 2180—390900677. T.L. was supported by the German Federal Ministry of Education and Research (BMBF, Horizon 2020 INSPIRATION grant 643271), under the frame of ERACoSysMed.

## Disclosures

The authors declared no competing interest for this work.

## Corresponding Author

Prof. Dr. Thorsten Lehr

Clinical Pharmacy, Saarland University

Campus C2 2, 66123 Saarbrücken

Phone: +49 681 302 70255

Email: thorsten.lehr@mx.uni-saarland.de

ORCID: 0000 0002 8372 1465

# Contents

|                                                                                                        |           |
|--------------------------------------------------------------------------------------------------------|-----------|
| <b>S1 Methods (Addendum)</b>                                                                           | <b>3</b>  |
| S1.1 Cocktail Studies . . . . .                                                                        | 3         |
| S1.2 Dextromethorphan Formulations . . . . .                                                           | 4         |
| S1.3 Virtual Individuals . . . . .                                                                     | 4         |
| S1.4 Virtual Populations . . . . .                                                                     | 4         |
| S1.5 Lysosomal Trapping in the Intestinal Mucosa . . . . .                                             | 4         |
| S1.6 PBPK Model Sensitivity Analysis . . . . .                                                         | 5         |
| <b>S2 PBPK Base Model Building</b>                                                                     | <b>6</b>  |
| S2.1 Drug-Dependent Parameters . . . . .                                                               | 6         |
| S2.2 Clinical Study Data . . . . .                                                                     | 8         |
| S2.3 Dextromethorphan model pathways . . . . .                                                         | 9         |
| <b>S3 PBPK Base Model Evaluation</b>                                                                   | <b>10</b> |
| S3.1 Plasma Concentration-Time Profiles . . . . .                                                      | 10        |
| S3.2 Goodness-of-Fit Plots: Plasma Concentrations . . . . .                                            | 13        |
| S3.3 MRD of Plasma Concentration Predictions . . . . .                                                 | 14        |
| S3.4 $AUC_{last}$ and $C_{max}$ Goodness-of-Fit Plots . . . . .                                        | 15        |
| S3.5 GMFE of Predicted $AUC_{last}$ and $C_{max}$ Values . . . . .                                     | 17        |
| S3.6 Sensitivity Analysis . . . . .                                                                    | 19        |
| <b>S4 DGI Model Building</b>                                                                           | <b>21</b> |
| S4.1 Population catalytic rate constant ( $k_{cat}$ ) Values . . . . .                                 | 21        |
| S4.2 DGI Clinical Study Data . . . . .                                                                 | 22        |
| <b>S5 DGI Model Evaluation</b>                                                                         | <b>23</b> |
| S5.1 Plasma Concentration-Time Profiles . . . . .                                                      | 23        |
| S5.2 Goodness-of-Fit Plots: Plasma Concentrations . . . . .                                            | 25        |
| S5.3 MRD of Plasma Concentration Predictions . . . . .                                                 | 26        |
| S5.4 $AUC_{last}$ and $C_{max}$ Goodness-of-Fit Plots . . . . .                                        | 27        |
| S5.5 GMFE of Predicted $AUC_{last}$ and $C_{max}$ Values . . . . .                                     | 29        |
| S5.6 DGI $AUC_{last}$ and $C_{max}$ Ratio Plots . . . . .                                              | 31        |
| S5.7 GMFE of Predicted DGI $AUC_{last}$ and $C_{last}$ Ratios . . . . .                                | 32        |
| <b>S6 Interindividual Variability Within Activity Score Groups</b>                                     | <b>33</b> |
| S6.1 Exploratory Analysis of Reported Individual Plasma Concentration-Time Profiles . . . . .          | 33        |
| S6.2 Mean Individual $k_{cat}$ Values . . . . .                                                        | 34        |
| S6.3 Clinical Study Data . . . . .                                                                     | 35        |
| S6.4 Plasma Concentration-Time Profiles . . . . .                                                      | 37        |
| S6.5 MRD of Plasma Concentration Predictions . . . . .                                                 | 47        |
| S6.6 Goodness-of-Fit Plots . . . . .                                                                   | 52        |
| S6.7 GMFE of Predicted $AUC_{last}$ and $C_{max}$ Values . . . . .                                     | 53        |
| S6.8 GMFE of Predicted $AUC_{last}$ and $C_{max}$ Values Grouped by Study and Activity Score . . . . . | 61        |
| <b>S7 Summary</b>                                                                                      | <b>64</b> |
| <b>S8 Abbreviations</b>                                                                                | <b>65</b> |

# S1 Methods (Addendum)

## S1.1 Cocktail Studies

**Table S1.1.1:** Phenotyping cocktails and respective drug doses

| Study                | Caffeine | Dextromethorphan | Digoxin                        | Mephenytoin | Midazolam                                       | Omeprazole | Tolbutamide | Warfarin           |
|----------------------|----------|------------------|--------------------------------|-------------|-------------------------------------------------|------------|-------------|--------------------|
| Population studies   |          |                  |                                |             |                                                 |            |             |                    |
| Armani 2017 [1]      | 100 mg   | 30 mg            | -                              | -           | 2 mg                                            | 20 mg      | -           | -                  |
| Dumond 2010 [8]      | 200 mg   | 30 mg            | 0.25 mg (po + iv) <sup>a</sup> | -           | 5 mg (po) <sup>c</sup> + 2 mg (iv) <sup>c</sup> | 20 mg      | -           | 10 mg <sup>b</sup> |
| Ermer 2015 [10]      | 200 mg   | 30 mg            | -                              | -           | 0.025 mg/kg (iv)                                | 40 mg      | -           | -                  |
| Kakuda 2014 [18]     | 15 mg    | 30 mg            | 0.5 mg (po)                    | -           | 1.5 mg (po)                                     | 40 mg      | -           | 10 mg <sup>b</sup> |
| Khalilieh 2018 [21]  | 20 mg    | 30 mg            | -                              | -           | 1.5 mg (po)                                     | 40 mg      | -           | 10 mg <sup>b</sup> |
| Nyunt 2008 [28]      | -        | 30 mg            | -                              | -           | 5 mg (po)                                       | -          | -           | -                  |
| Sager 2014 [31]      | 100 mg   | 30 mg            | -                              | -           | 2 mg (po)                                       | 20 mg      | -           | -                  |
| Stage 2018 [35]      | 100 mg   | 30 mg            | -                              | -           | 2.5 mg (buccal)                                 | 20 mg      | -           | -                  |
| DGI studies          |          |                  |                                |             |                                                 |            |             |                    |
| Gorski 2004 [14]     | 200 mg   | 30 mg            | -                              | -           | 0.05 mg/kg (iv)                                 | -          | 500 mg      | -                  |
| Gazzaz 2018 [13]     | 150 mg   | 30 mg            | -                              | -           | 2 mg (po)                                       | 20 mg      | -           | -                  |
| Frank 2009 [12]      |          |                  |                                |             |                                                 |            |             |                    |
| Study A              | 150 mg   | 30 mg            | -                              | 50 mg       | 2 mg (po) + 1 mg (iv) <sup>c</sup>              | -          | 125 mg      | -                  |
| Study B <sup>d</sup> | 150 mg   | 30 mg            | 0.5 mg                         | 50 mg       | 2 mg (po) + 1 mg (iv) <sup>c</sup>              | -          | 125 mg      | -                  |
| Study C              | 150 mg   | 30 mg            | -                              | 50 mg       | 2 mg (po) + 1 mg (iv) <sup>c</sup>              | -          | 125 mg      | -                  |
| Study D              | -        | 30 mg            | 0.5 mg                         | 50 mg       | 1.5 mg (po) + 1 mg (iv) <sup>c</sup>            | -          | -           | -                  |
| Study E              | -        | 30 mg            | 0.5 mg                         | 50 mg       | 1.5 mg (po) + 1 mg (iv) <sup>c</sup>            | -          | -           | -                  |

-: not administered, <sup>a</sup>: doses were administered on the study days following the administration of the phenotyping cocktail, <sup>b</sup>: Study subjects received 10 mg vitamin K together with the warfarin dose, <sup>c</sup>: iv dose administered 240 min after administration of the cocktail, <sup>d</sup>: study excluded from modeling due to reasons described in Section S6.1, iv: intravenous, po: oral.

## S1.2 Dextromethorphan Formulations

The Weibull function was implemented according to Eq. 1 and 2 [23] to describe the dissolution process for studies where dextromethorphan was administered in a cocktail capsule

$$m = 1 - \exp\left(\frac{-(t - T_{lag})^\beta}{\alpha}\right) \quad (1)$$

$$\alpha = (T_d)^\beta \quad (2)$$

where  $m$  = fraction of dissolved drug at time  $t$ ,  $T_{lag}$  = lag time before the onset of dissolution,  $\alpha$  = scale parameter,  $\beta$  = shape parameter,  $T_d$  = time needed to dissolve 63% of the formulation.

The final Weibull shape parameters and Weibull time parameters (50% dissolved) for the cocktail formulation used in the dextromethorphan physiologically based pharmacokinetic (PBPK) model are given in Table S2.1.1.

## S1.3 Virtual Individuals

The PBPK model was built based on data from healthy individuals, using the reported sex, ethnicity and mean values for age, weight and height from each study protocol. If no demographic information was provided, the following default values were substituted: male, European, 30 years of age, 73 kg body weight and 176 cm body height (characteristics from the PK-Sim<sup>®</sup> population database [27, 38, 41]. Cytochrome P450 2D6 (CYP2D6) was implemented in accordance with literature, using the PK-Sim<sup>®</sup> expression database to define their relative expression in the different organs of the body [29]. Details on the implementation of CYP2D6 are summarized in Section ??.

## S1.4 Virtual Populations

For population simulations, virtual populations of 1000 individuals were created based on the population characteristics stated in the respective publication. If no information was provided in the publication, populations based on European male individuals aged 20–50 years were assumed. Metrics were generated (depending on ethnicity) from one of the following databases; American: Third National Health and Nutrition Examination Survey (NHANES) [27] database, Asian: Tanaka model [38], European: International Commission on Radiological Protection (ICRP) database [41]. In the generated virtual populations, system-dependent parameters such as weight, height, organ volumes, blood flow rates, tissue compositions, etc. were varied by the implemented algorithm in PK-Sim<sup>®</sup> within the limits of the databases listed above [27, 38, 41]. Since study populations were grouped by their CYP2D6 activity score or phenotype, no variability in CYP2D6 reference concentrations was assumed for population simulations. Reference concentrations of implemented proteins as well as the relative expression are provided in Section ??.

## S1.5 Lysosomal Trapping in the Intestinal Mucosa

Although dextromethorphan is rapidly absorbed from the intestine, time to reach peak plasma concentration  $C_{max}$  ( $t_{max}$ ) often occurs as late as 4h after oral administration [4]. This phenomenon likely occurs due to lysosomal trapping of dextromethorphan in the intestinal mucosa [4, 20]. However, other processes, such as renal excretion may also be affected by lysosomal trapping in the respective tissue. In short, lipophilic amines ( $\log P > 1$ , acid dissociation constant ( $pK_a$ )  $> 6$ ) accumulate in

lysosomes due to rapid diffusion across the lysosomal membrane in unionized form. Subsequently, due to the acidic environment in lysosomes (pH 4–5), the amine is then ionized and thus unable to permeate back into the cytosol [20]. The information necessary to physiologically implement lysosomal trapping (i.e. relative abundances of lysosomes in relevant tissues and diffusion constants for permeation across lysosomal membranes) are not yet available in the literature. Hence, intestinal lysosomal trapping was implemented as follows: First, a surrogate protein binding partner was expressed in high abundances (500  $\mu\text{mol/L}$ ) in the relevant tissues (duodenum, upper jejunum, lower jejunum, upper ileum and lower ileum, each 100% of relative expression). Second, a corresponding protein binding process was implemented for dextromethorphan. Finally, the relevant parameters for the binding process - dissociation rate constant ( $k_{\text{off}}$ ) and dissociation constant ( $K_D$ ) - were informed by parameter optimization. For a comprehensive explanation on the process of lysosomal trapping under physiological circumstances, please refer to [20].

## S1.6 PBPK Model Sensitivity Analysis

Sensitivity of the final models to single parameter changes (local sensitivity analysis) was calculated as relative change of the area under the plasma concentration-time curve ( $\text{AUC}_{0-24\text{h}}$ ). Sensitivity analysis was carried out using a relative perturbation of 1000% (variation range 10.0, maximum number of 9 steps). Parameters were included into the analysis if they have been optimized, if they are associated with optimized parameters or if they might have a strong impact due to calculation methods used in the model. Sensitivity to a parameter was calculated as the ratio of the relative change of the simulated  $\text{AUC}_{0-24\text{h}}$  to the relative variation of the parameter according to Eq. 3:

$$S = \frac{\Delta \text{AUC}_{0-24\text{h}}}{\Delta p} \times \frac{p}{\text{AUC}_{0-24\text{h}}} \quad (3)$$

where  $S$  = sensitivity of the  $\text{AUC}_{0-24\text{h}}$  to the examined model parameter,  $\Delta \text{AUC}_{0-24\text{h}}$  = change of the  $\text{AUC}_{0-24\text{h}}$ ,  $\text{AUC}_{0-24\text{h}}$  = simulated  $\text{AUC}_{0-24\text{h}}$  with the original parameter value,  $\Delta p$  = change of the examined parameter value,  $p$  = original parameter value.

A sensitivity of +0.5 signifies that a 100% increase of the examined parameter value causes a 50% increase of the simulated  $\text{AUC}_{0-24\text{h}}$ . The results of the sensitivity analysis are provided in Section S3.6.

# S2 PBPK Base Model Building

## S2.1 Drug-Dependent Parameters

**Table S2.1.1:** Dextromethorphan and dextrorphan drug-dependent parameters drug-dependent parameters

| Parameter                           | Unit   | Value                   | Source | Literature              | Reference  | Value                   | Source | Literature              | Reference  | Description                    |  |
|-------------------------------------|--------|-------------------------|--------|-------------------------|------------|-------------------------|--------|-------------------------|------------|--------------------------------|--|
|                                     |        | <b>Dextromethorphan</b> |        |                         |            | <b>Dextrorphan</b>      |        |                         |            |                                |  |
| MW                                  | g/mol  | 271.41                  | Lit.   | 271.41                  | [2]        | 257.37                  | Lit.   | 257.37                  | [16, 43]   | Molecular weight               |  |
| pKa (strongest basic)               | -      | 9.10                    | Lit.   | 9.10                    | [34]       | 9.10                    | Lit.   | 9.10                    | [34]       | Acid dissociation constant     |  |
| pKa (strongest acidic)              | -      | -                       | Lit.   | -                       | -          | 10.10                   | Lit.   | 10.10                   | [34]       | Acid dissociation constant     |  |
| Solubility (base)                   | g/L    | -                       | -      | -                       | -          | 0.17                    | Lit.   | 0.17                    | [43]       | Solubility at pH 7             |  |
| Solubility (hydrobromide)           | g/L    | 15.00                   | Lit.   | 15.00                   | [2]        | -                       | -      | -                       | -          | Solubility at pH 7             |  |
| logP                                | -      | 4.10                    | Lit.   | 4.10                    | [34]       | 2.90                    | Lit.   | 2.90                    | [22]       | Lipophilicity                  |  |
| f <sub>u</sub>                      | %      | 35.00                   | Lit.   | 35.00                   | [25]       | 42.00                   | Lit.   | 42.00                   | [42]       | Fraction unbound               |  |
| CYP2D6 K <sub>M</sub> → dxt         | μmol/L | 4.65                    | Lit.   | 4.65 <sup>a</sup>       | [5]        | -                       | -      | -                       | -          | Michaelis-Menten constant      |  |
| CYP2D6 k <sub>cat</sub> → dxt (EM)  | 1/min  | 90.89                   | Optim. | 6.60                    | [5]        | -                       | -      | -                       | -          | Catalytic rate constant        |  |
| CYP2D6 k <sub>cat</sub> → dxt (PM)  | 1/min  | 0.00                    | -      | -                       | -          | -                       | -      | -                       | -          | Catalytic rate constant        |  |
| CYP3A4 K <sub>M</sub>               | μmol/L | 176.80                  | Lit.   | 176.80 <sup>a</sup>     | [25]       | 910.00                  | Lit.   | 910.00 <sup>a</sup>     | [25]       | Michaelis-Menten constant      |  |
| CYP3A4 k <sub>cat</sub>             | 1/min  | 7.94                    | Lit.   | 5.65                    | [25]       | 7.41                    | Lit.   | 7.41                    | [25]       | Catalytic rate constant        |  |
| UGT2B15 K <sub>M</sub> → dxt-glu    | μmol/L | -                       | -      | -                       | -          | 184.80                  | Lit.   | 184.80 <sup>a</sup>     | [25]       | Michaelis-Menten constant      |  |
| UGT2B15 k <sub>cat</sub> → dxt-glu  | 1/min  | -                       | -      | -                       | -          | 1137.98                 | Optim. | 37.04                   | [25]       | Catalytic rate constant        |  |
| Lysosomal trapping K <sub>D</sub>   | μmol/L | 74.21                   | -      | -                       | -          | -                       | -      | -                       | -          | Dissociation constant          |  |
| Lysosomal trapping k <sub>off</sub> | 1/min  | 7.10 · 10 <sup>5</sup>  | -      | -                       | -          | -                       | -      | -                       | -          | Dissociation rate constant     |  |
| GFR fraction                        | -      | 1.00                    | Asm.   | -                       | -          | 1.00                    | Asm.   | -                       | -          | Filtered drug in the urine     |  |
| EHC continuous fraction             | -      | 1.00                    | Asm.   | -                       | -          | 1.00                    | Asm.   | -                       | -          | Bile fraction cont. released   |  |
| Intestinal perm.                    | cm/min | 2.48 · 10 <sup>-6</sup> | Optim. | 1.12 · 10 <sup>-3</sup> | Calc. [40] | 1.80 · 10 <sup>-5</sup> | Calc.  | 1.80 · 10 <sup>-5</sup> | Calc. [40] | Transcellular intestinal perm. |  |
| Cellular permeability               | cm/min | 0.91                    | Calc.  | PK-Sim                  | [19]       | 0.08                    | Calc.  | PK-Sim                  | [19]       | Perm. into the cellular space  |  |
| Partition coefficients              | -      | Diverse                 | Calc.  | Ber                     | [3]        | Diverse                 | Calc.  | Ber                     | [3]        | Cell to plasma partitioning    |  |
| Weibull time parameter              | min    | 46.05                   | Optim. | [12]                    | -          | -                       | -      | -                       | -          | Dissolution time (50%)         |  |
| Weibull shape parameter             | -      | 1.05                    | Optim. | [12]                    | -          | -                       | -      | -                       | -          | Dissolution shape              |  |

-: not available, <sup>a</sup>: in vitro values corrected for binding in the assay (f<sub>u,mic</sub>) as given in the respective publications, asm.: assumed, Ber: Berezhkovskiy calculation method, calc.: calculated, cont.: continuously, CYP2D6: Cytochrome P450 2D6, CYP3A4: cytochrome P450 3A4, dxt: dextrorphan, dxt-glu: dextrorphan *O*-glucuronide, EHC: enterohepatic circulation, GFR: glomerular filtration rate, intest.: intestinal, lit: literature, EM: extensive metabolizer, optim.: optimized, perm.: permeability, PM: poor metabolizer, PK-Sim: PK-Sim standard calculation method, uridine 5'-diphospho-glucuronosyltransferase family 2 member B15 (UGT2B15): uridine 5'-diphospho-glucuronosyltransferase family 2 member B15.

**Table S2.1.2: Dextrorphan O-glucuronide drug-dependent parameters**

| Parameter               | Unit   | Value                | Source | Literature           | Reference  | Description                    |
|-------------------------|--------|----------------------|--------|----------------------|------------|--------------------------------|
| MW                      | g/mol  | 433.50               | Lit.   | 433.50               | [17, 43]   | Molecular weight               |
| pKa (strongest basic)   | -      | 9.82                 | Lit.   | 9.82                 | [17, 43]   | Acid dissociation constant     |
| pKa (strongest acidic)  | -      | 2.85                 | Lit.   | 2.85                 | [17, 43]   | Acid dissociation constant     |
| Solubility              | g/L    | 1.20                 | Lit.   | 1.20                 | [17, 43]   | Solubility                     |
| logP                    | -      | 0.29                 | Optim. | 1.38                 | [17, 43]   | Lipophilicity                  |
| f <sub>u</sub>          | %      | 37.00                | Calc.  | 37.00                | [42]       | Fraction unbound               |
| GFR fraction            | -      | 4.92                 | Optim. | -                    | -          | Filtered drug in the urine     |
| EHC continuous fraction | -      | 1.00                 | Asm.   | -                    | -          | Bile fraction cont. released   |
| Intestinal permeability | cm/min | $4.26 \cdot 10^{-6}$ | Calc.  | $4.26 \cdot 10^{-6}$ | Calc. [40] | Transcellular intestinal perm. |
| Cellular permeability   | cm/min | $8.51 \cdot 10^{-6}$ | Calc.  | CdS                  | [33]       | Perm. into the cellular space  |
| Partition coefficients  | -      | Diverse              | Calc.  | Ber                  | [3]        | Cell to plasma partitioning    |

-: not available, asm: assumed, Ber: Berezhkovskiy calculation method, calc.: calculated, CdS: Charge dependent Schmitt, cont.: continuously, EHC: enterohepatic circulation, GFR: glomerular filtration rate, intest.: intestinal, lit.: literature, optim: optimized, perm.: permeability.

## S2.2 Clinical Study Data

**Table S2.2.3:** Dextromethorphan study table

| Route                 | Dose [mg] | n  | Females [%] | Age [years] | Weight [kg] | Height [cm]   | Metabolite measured | CYP2D6 P. Phenotype | Dataset           | References               |
|-----------------------|-----------|----|-------------|-------------|-------------|---------------|---------------------|---------------------|-------------------|--------------------------|
| iv (inf, 30 min, sd)  | 0.5/kg    | 24 | 0           | 27 (21-35)  | 79 (55-110) | -             | -                   | EM                  | training          | Duedahl 2005 [7]         |
| po (cap, sd)          | 80        | 36 | 0           | 26          | 73          | -             | dt                  | EM                  | training          | Tennezé 1999 [39]        |
| po (-, sd)            | 60        | 17 | 41          | 67 (49-74)  | 80 (49-107) | 173 (150-187) | dt                  | EM                  | test              | Feld 2013 [11]           |
| po (cap, bid, 8 days) | 60        | 10 | 0           | -           | -           | -             | dt                  | EM                  | test              | Antecip Bioventures [24] |
| po (cap, sd)          | 30        | 20 | 50          | (27-42)     | 73          | -             | -                   | EM                  | test <sup>a</sup> | Armani 2017 [1]          |
| po (cap, sd)          | 30        | 23 | 30          | 27          | 76          | 174           | -                   | EM                  | test <sup>a</sup> | Dumond 2010 [8]          |
| po (cap, sd)          | 30        | 48 | 35          | 33          | 76          | 171           | -                   | EM                  | test              | Edwards 2017 [9]         |
| po (cap, sd)          | 30        | 30 | 40          | (18-45)     | 78          | 172           | dxt                 | EM                  | test <sup>a</sup> | Ermer 2015 [10]          |
| po (-, sd)            | 30        | 14 | 0           | (21-49)     | -           | -             | -                   | EM                  | test <sup>a</sup> | Kakuda 2014 [18]         |
| po (-, sd)            | 30        | 20 | 35          | 40 (22-63)  | -           | -             | -                   | EM                  | test <sup>a</sup> | Khalilieh 2018 [21]      |
| po (tab, sd)          | 50        | 24 | 0           | 25 (20-33)  | 64 (50-76)  | -             | dxt                 | EM                  | test              | Nakashima 2007 [26]      |
| po (-, sd)            | 30        | 12 | 25          | 40 (22-53)  | -           | -             | -                   | EM                  | test <sup>a</sup> | Nyunt 2008 [28]          |
| po (cap, sd)          | 30        | 10 | 50          | 20          | 72          | 172           | dxt                 | EM                  | test <sup>a</sup> | Sager 2014 [31]          |
| po (cap, sd)          | 30        | 5  | 80          | 26 (22-31)  | -           | -             | dxt, dxt-glu        | EM                  | training          | Schadel 1995 [32]        |
| po (cap, sd)          | 30        | 4  | 50          | 33 (22-46)  | -           | -             | -                   | PM                  | training          | Schadel 1995 [32]        |
| po (cap, sd)          | 30        | 12 | 0           | (21-29)     | -           | -             | -                   | EM                  | test <sup>a</sup> | Stage 2018 [35]          |

Values for age, weight and height are given as mean (range), -: not given, <sup>a</sup>: cocktail study, AS: CYP2D6 activity score, bid: twice daily, cap: capsule, CYP2D6: Cytochrome P450 2D6, DGI: drug-gene interaction, dxt: dextrophan, dxt-glu: dextrophan *O*-glucuronide, dt: total dextrophan, EM: extensive metabolizer, inf: infusion, iv: intravenous, p.: projected, PM: poor metabolizer, po: oral, sd: single dose, sol: oral solution.



## S2.3 Dextromethorphan model pathways

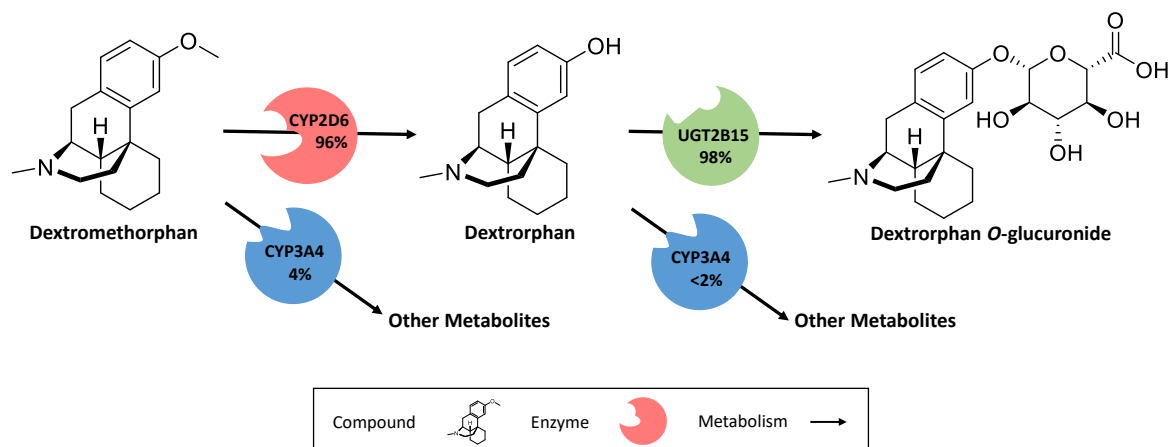

**Figure S2.3.1:** Implemented dextromethorphan metabolic pathways. Dextromethorphan is *O*-demethylated by CYP2D6 and *N*-demethylated by CYP3A4. The metabolite dextrorphan is further metabolized via CYP3A4 (*N*-demethylation) and UGT2B15 (*O*-glucuronidation). Dextrorphan *O*-glucuronide is excreted in the urine. Percentages shown refer to the fraction metabolized by the respective enzyme, calculated for extensive metabolizers of CYP2D6. CYP2D6: cytochrome P450 2D6, CYP3A4: cytochrome P450 3A4, UGT2B15: Uridine 5'-diphospho-glucuronosyltransferase 2B15.

## S3 PBPK Base Model Evaluation

### S3.1 Plasma Concentration-Time Profiles

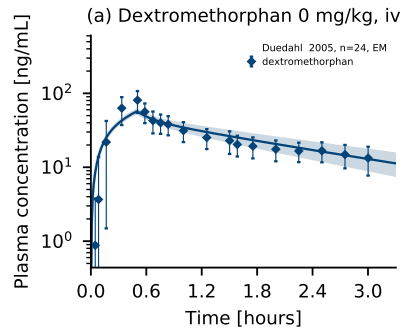

**Figure S3.1.1:** Dextromethorphan plasma concentration-time profile after intravenous administration of dextromethorphan (semilogarithmic representation). Population predictions (n=1000) are shown as lines with ribbons (arithmetic mean  $\pm$  standard deviation (SD)), symbols represent the corresponding observed data  $\pm$  SD. EM: extensive metabolizer, iv: intravenous.

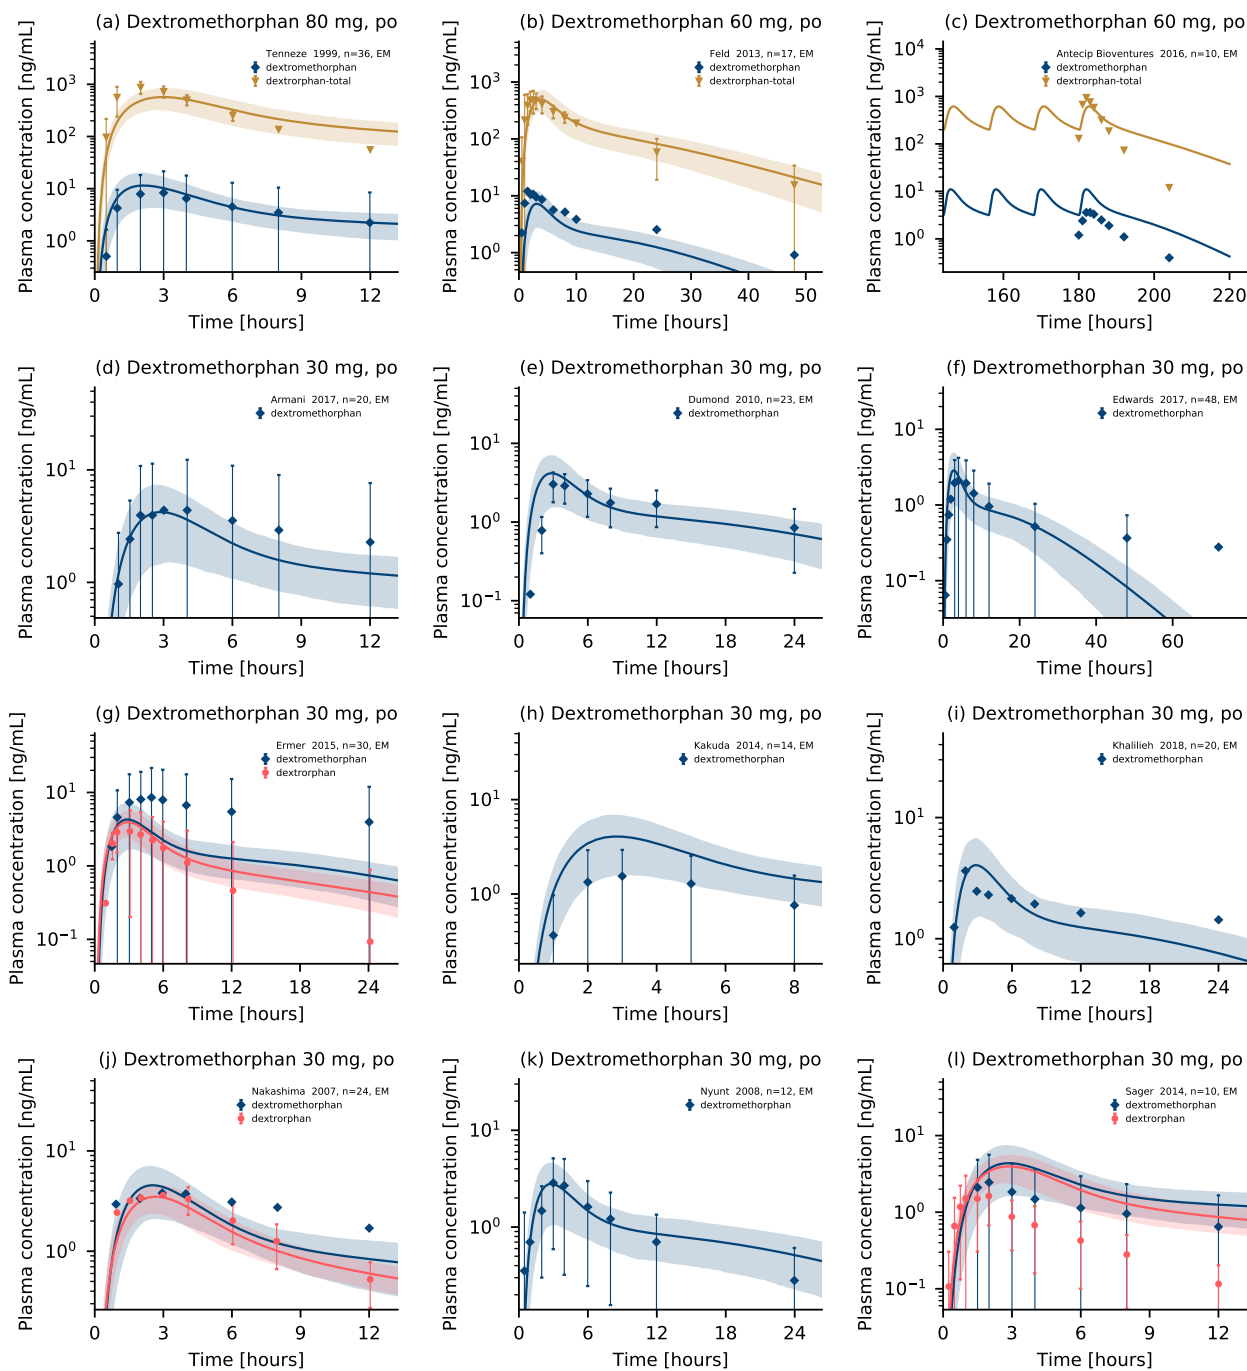

**Figure S3.1.2:** Dextromethorphan, dextrophan and total dextrophan (dextrophan + dextrophan *O*-glucuronide) plasma concentration-time profiles after oral administration of dextromethorphan (semilogarithmic representation). Population predictions ( $n=1000$ ) are shown as lines with ribbons (arithmetic mean  $\pm$  standard deviation (SD)), symbols represent the corresponding observed data  $\pm$  SD. EM: extensive metabolizer, po: oral.

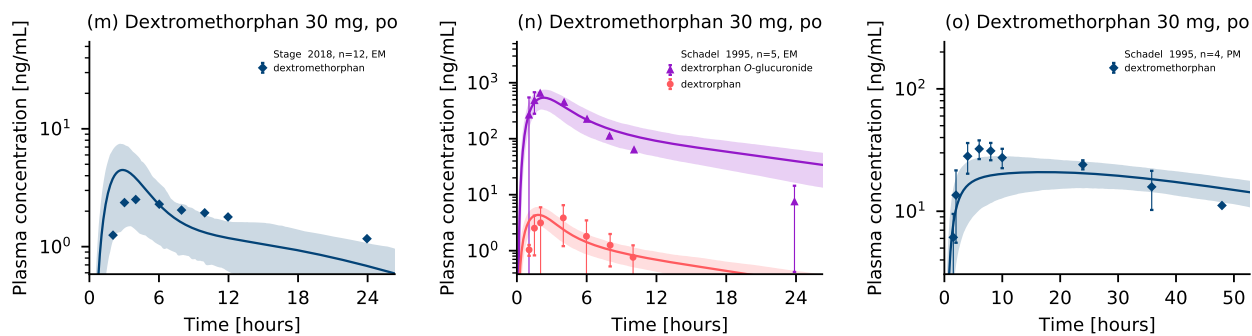

**Figure S3.1.3:** Dextromethorphan, dextropran, dextropran *O*-glucuronide and total dextropran (dextropran + dextropran *O*-glucuronide) plasma concentration-time profiles after oral administration of dextromethorphan (semilogarithmic representation). Population predictions ( $n=1000$ ) are shown as lines with ribbons (arithmetic mean  $\pm$  standard deviation (SD)), symbols represent the corresponding observed data  $\pm$  SD. EM: extensive metabolizer, PM: poor metabolizer, po: oral.

## S3.2 Goodness-of-Fit Plots: Plasma Concentrations

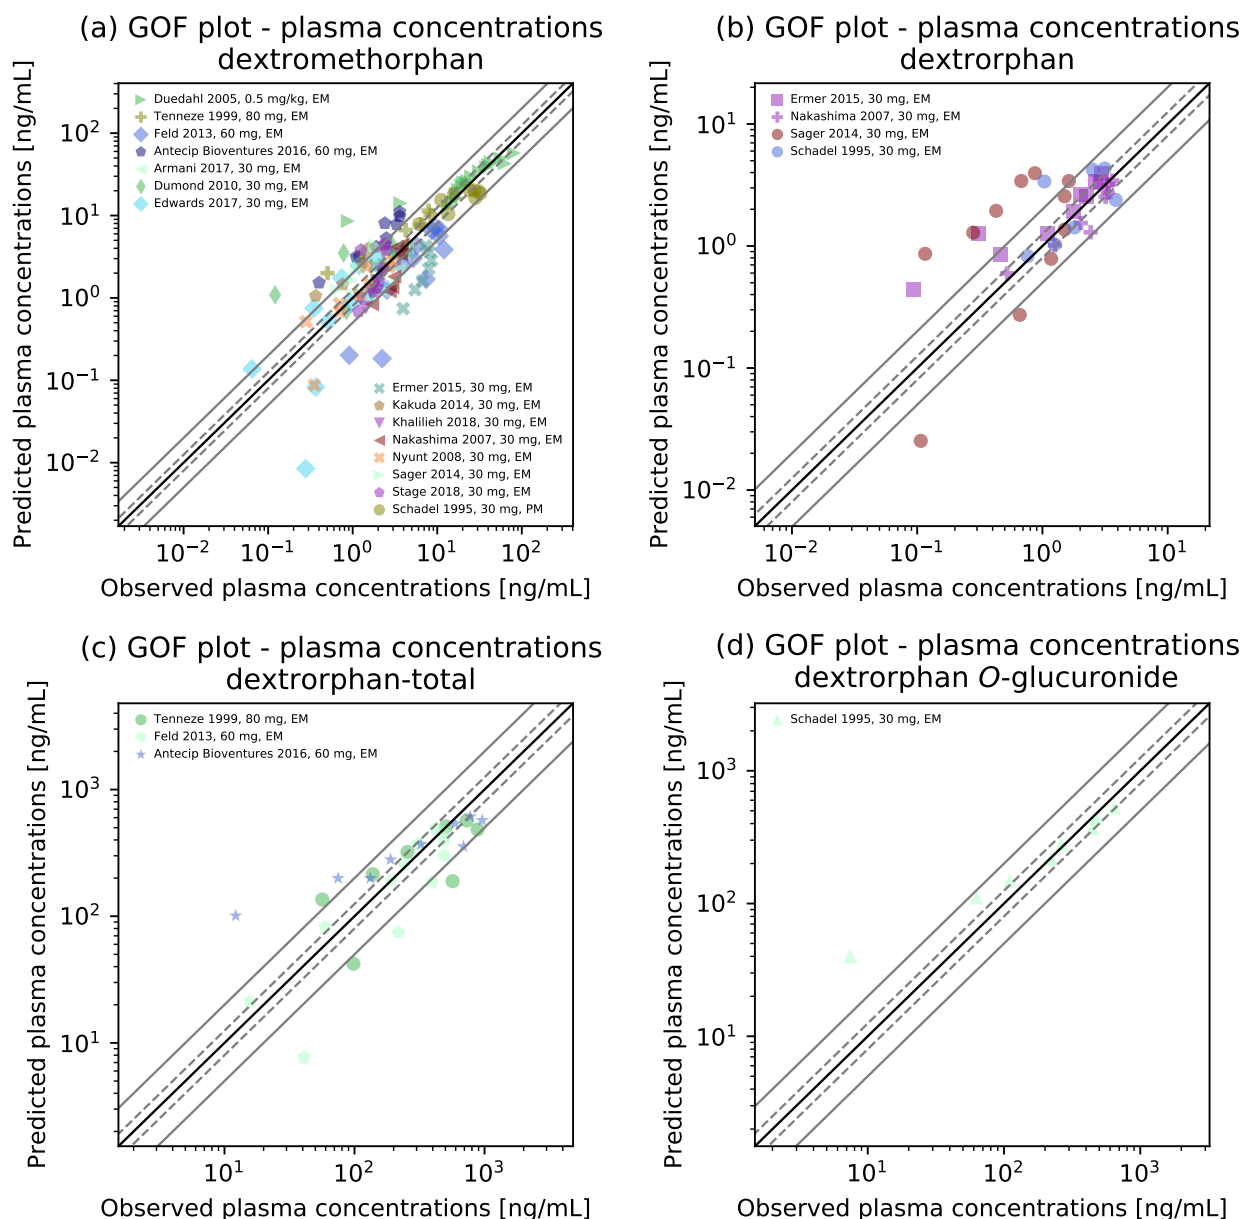

**Figure S3.2.4:** Goodness-of-fit plots. Predicted versus observed plasma concentration values for (a) dextromethorphan, (b) dextrorphan, (c) total dextrophan (dextrophan + dextrophan O-glucuronide) and (d) dextrorphan O-glucuronide for all studies of the PBPK model building dataset. The solid black line marks the line of identity, the dashed gray lines mark the 0.8- to 1.25-fold range, the solid gray lines indicate the 0.5- to 2-fold range. Colored symbols represent the study population given in the legend. EM: extensive metabolizer, PM: poor metabolizer.

### S3.3 MRD of Plasma Concentration Predictions

**Table S3.3.1:** Mean relative deviation of plasma concentration predictions

| Dosing                          | Molecule                  | CYP2D6 status | MRD                     | Reference                  |
|---------------------------------|---------------------------|---------------|-------------------------|----------------------------|
| iv, inf, 0.5 mg                 | dextromethorphan          | EM            | 1.87                    | Duedahl et al. 2005 [7]    |
| po, cap, 80 mg                  | dextromethorphan          | EM            | 1.85                    | Tenneze et al. 1999 [39]   |
| po, -, 60 mg                    | dextromethorphan          | EM            | 3.19                    | Feld et al. 2013 [11]      |
| po, tab, 60 mg                  | dextromethorphan          | EM            | 2.73                    | Antecip Bioventures [24]   |
| po, cap, 30 mg                  | dextromethorphan          | EM            | 1.42                    | Armani et al. 2017 [1]     |
| po, cap, 30 mg                  | dextromethorphan          | EM            | 2.60                    | Dumond et al. 2010 [8]     |
| po, cap, 30 mg                  | dextromethorphan          | EM            | 3.32                    | Edwards et al. 2017 [9]    |
| po, -, 30 mg                    | dextromethorphan          | EM            | 2.96                    | Ermer et al. 2015 [10]     |
| po, cap, 30 mg                  | dextromethorphan          | EM            | 2.63                    | Kakuda et al. 2014 [18]    |
| po, -, 30 mg                    | dextromethorphan          | EM            | 1.46                    | Khalilieh et al. 2018 [21] |
| po, tab, 30 mg                  | dextromethorphan          | EM            | 1.70                    | Nakashima et al. 2007 [26] |
| po, cap, 30 mg                  | dextromethorphan          | EM            | 1.94                    | Nyunt et al. 2008 [28]     |
| po, cap, 30 mg                  | dextromethorphan          | EM            | 1.97                    | Sager et al. 2014 [31]     |
| po, cap, 30 mg                  | dextromethorphan          | PM            | 1.44                    | Schadel et al. 1995 [32]   |
| po, cap, 30 mg                  | dextromethorphan          | EM            | 1.74                    | Stage et al. 2018 [35]     |
| MRD (dextromethorphan)          |                           |               | 2.19 (1.42–3.32)        |                            |
|                                 |                           |               | 9/15 with MRD $\leq$ 2  |                            |
| po, -, 30 mg                    | dextrorphan               | EM            | 2.05                    | Ermer et al. 2015 [10]     |
| po, tab, 30 mg                  | dextrorphan               | EM            | 1.35                    | Nakashima et al. 2007 [26] |
| po, cap, 30 mg                  | dextrorphan               | EM            | 3.56                    | Sager et al. 2014 [31]     |
| po, cap, 30 mg                  | dextrorphan               | EM            | 1.73                    | Schadel et al. 1995 [32]   |
| MRD (dextrorphan)               |                           |               | 2.17 (1.35–3.56)        |                            |
|                                 |                           |               | 2/4 with MRD $\leq$ 2   |                            |
| po, cap, 30 mg                  | dextrorphan O-glucuronide | EM            | 2.01                    | Schadel et al. 1995 [32]   |
| MRD (dextrorphan O-glucuronide) |                           |               | 2.01                    |                            |
|                                 |                           |               | 0/1 with MRD $\leq$ 2   |                            |
| po, cap, 80 mg                  | dextrorphan-total         | EM            | 1.88                    | Tenneze et al. 1999 [39]   |
| po, -, 60 mg                    | dextrorphan-total         | EM            | 2.04                    | Feld et al. 2013 [11]      |
| po, tab, 60 mg                  | dextrorphan-total         | EM            | 3.40                    | Antecip Bioventures [24]   |
| MRD (dextrorphan-total)         |                           |               | 2.44 (1.88–3.40)        |                            |
|                                 |                           |               | 1/3 with MRD $\leq$ 2   |                            |
| Overall MRD                     |                           |               | 2.21 (1.35–3.56)        |                            |
|                                 |                           |               | 12/23 with MRD $\leq$ 2 |                            |

-: not given, cap: capsule, CYP2D6: Cytochrome P450 2D6, EM: extensive metabolizer, inf: infusion, iv: intravenous, PM: poor metabolizer, po: oral.

### S3.4 $AUC_{last}$ and $C_{max}$ Goodness-of-Fit Plots

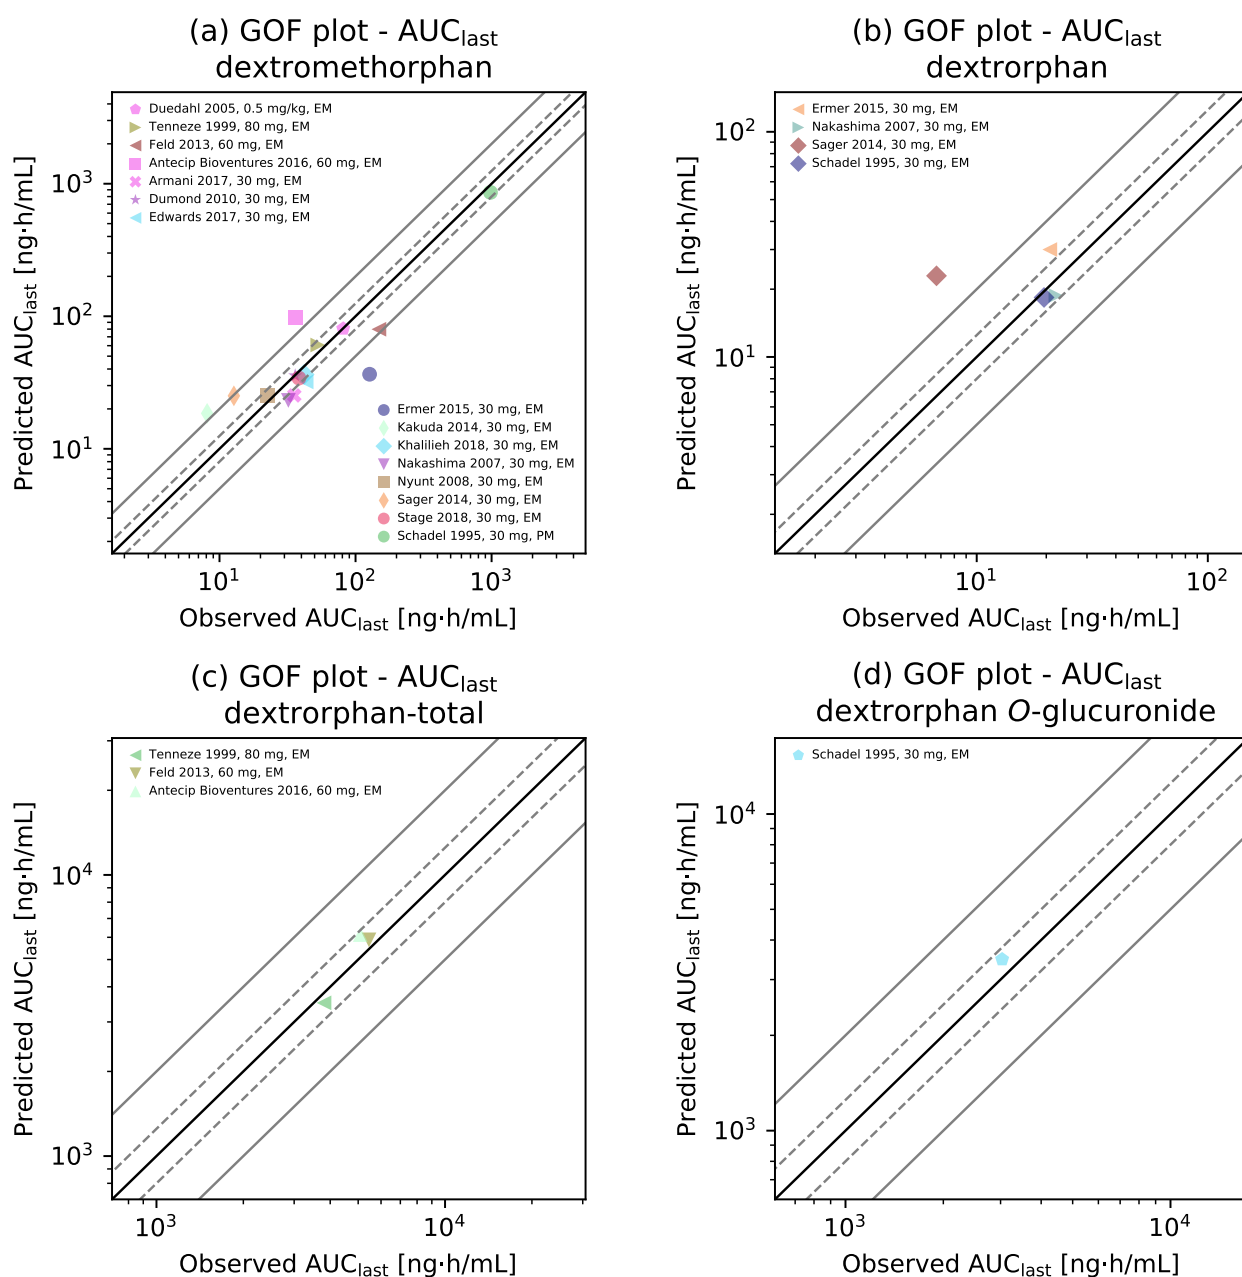

**Figure S3.4.5:** AUC from the time of the first concentration measurement to the last time point of concentration measurement ( $AUC_{last}$ ) correlation plots. Predicted versus observed  $AUC_{last}$  for (a) dextromethorphan, (b) dextrorphan, (c) total dextrorphan (dextrorphan + dextrorphan *O*-glucuronide) and (d) dextrorphan *O*-glucuronide for all studies of the PBPK model building dataset. The solid black line marks the line of identity, the dashed gray lines mark the 0.8- to 1.25-fold range, the solid gray lines indicate the 0.5- to 2-fold range. Colored symbols represent the study population given in the legend.  $AUC_{last}$ : AUC from the time of the first concentration measurement to the last time point of concentration measurement, EM: extensive metabolizer, PM: poor metabolizer.

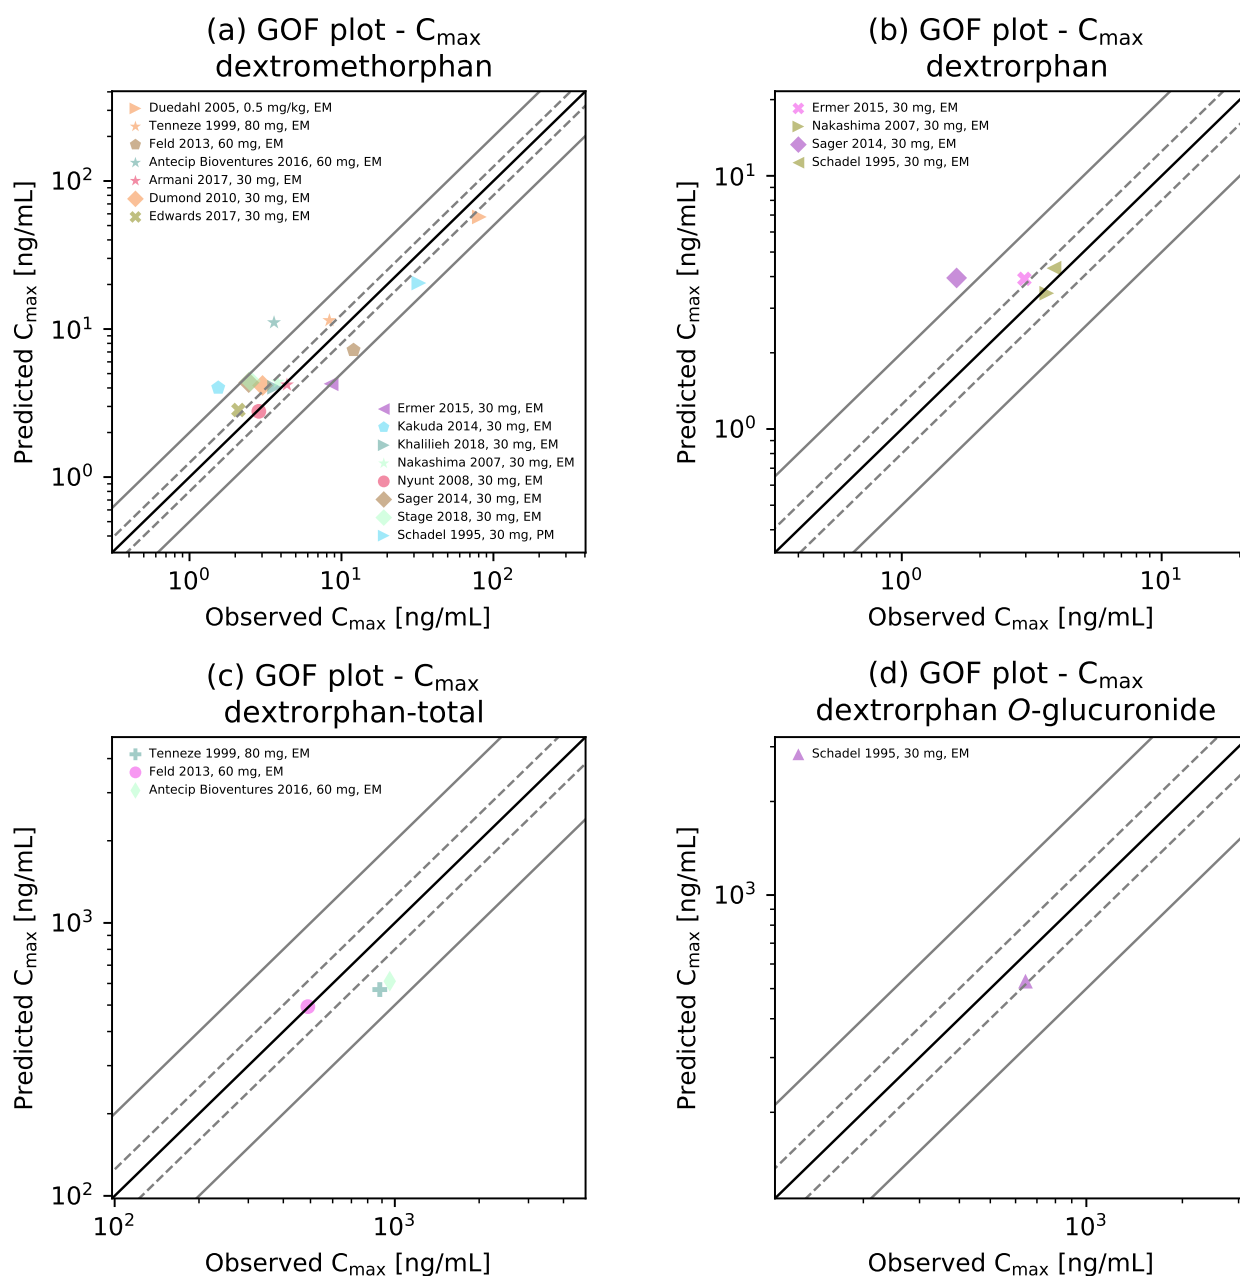

**Figure S3.4.6:**  $C_{max}$  correlation plots. Predicted versus observed  $C_{max}$  for (a) dextromethorphan, (b) dextrorphan, (c) total dextrorphan (dextrorphan + dextrorphan *O*-glucuronide) and (d) dextrorphan *O*-glucuronide for all studies of the PBPK model building dataset. The solid black line marks the line of identity, the dashed gray lines mark the 0.8- to 1.25-fold range, the solid gray lines indicate the 0.5- to 2-fold range. Colored symbols represent the study population given in the legend.  $C_{max}$ : peak plasma concentration, EM: extensive metabolizer, PM: poor metabolizer.



### S3.5 GMFE of Predicted AUC<sub>last</sub> and C<sub>max</sub> Values

**Table S3.5.2:** Predicted and observed AUC<sub>last</sub> and C<sub>max</sub> values and geometric mean fold errors

| Dosing                                   | Molecule                          | CYP2D6<br>status | AUC <sub>last</sub> [ng·h/mL] |         |                                         | C <sub>max</sub> [ng/mL] |        |                                         | Reference                     |
|------------------------------------------|-----------------------------------|------------------|-------------------------------|---------|-----------------------------------------|--------------------------|--------|-----------------------------------------|-------------------------------|
|                                          |                                   |                  | Pred                          | Obs     | Pred/Obs                                | Pred                     | Obs    | Pred/Obs                                |                               |
| iv, inf, 0.5 mg/kg                       | dextromethorphan                  | EM               | 80.25                         | 81.20   | 0.99                                    | -                        | -      | -                                       | Duedahl et al. 2005 [7]       |
| po, cap, 80 mg                           | dextromethorphan                  | EM               | 65.59                         | 52.78   | 1.24                                    | 12.94                    | 8.33   | 1.55                                    | Tenneze et al. 1999 [39]      |
| po, -, 60 mg                             | dextromethorphan                  | EM               | 83.31                         | 148.40  | 0.56                                    | 6.73                     | 12.01  | 0.56                                    | Feld et al. 2013 [11]         |
| po, tab, 60 mg                           | dextromethorphan                  | EM               | 95.57                         | 36.14   | 2.64                                    | 10.69                    | 3.60   | 2.97                                    | Antecip Bioventures 2016 [24] |
| po, cap, 30 mg                           | dextromethorphan                  | EM               | 25.66                         | 35.47   | 0.72                                    | 4.33                     | 4.38   | 0.99                                    | Armani et al. 2017 [1]        |
| po, cap, 30 mg                           | dextromethorphan                  | EM               | 36.25                         | 36.01   | 1.01                                    | 4.22                     | 3.02   | 1.39                                    | Dumond et al. 2010 [8]        |
| po, cap, 30 mg                           | dextromethorphan                  | EM               | 31.61                         | 43.32   | 0.73                                    | 2.95                     | 2.10   | 1.41                                    | Edwards et al. 2017 [9]       |
| po, -, 30 mg                             | dextromethorphan                  | EM               | 36.87                         | 126.85  | 0.29                                    | 3.85                     | 8.55   | 0.45                                    | Ermer et al. 2015 [10]        |
| po, cap, 30 mg                           | dextromethorphan                  | EM               | 19.51                         | 8.11    | 2.40                                    | 4.35                     | 1.55   | 2.82                                    | Kakuda et al. 2014 [18]       |
| po, -, 30 mg                             | dextromethorphan                  | EM               | 36.97                         | 41.89   | 0.88                                    | 4.27                     | 3.63   | 1.18                                    | Khalilieh et al. 2018 [21]    |
| po, tab, 30 mg                           | dextromethorphan                  | EM               | 23.03                         | 32.08   | 0.72                                    | 4.26                     | 3.81   | 1.12                                    | Nakashima et al. 2007 [26]    |
| po, cap, 30 mg                           | dextromethorphan                  | EM               | 23.77                         | 22.53   | 1.05                                    | 2.45                     | 2.86   | 0.86                                    | Nyunt et al. 2008 [28]        |
| po, cap, 30 mg                           | dextromethorphan                  | EM               | 25.79                         | 12.76   | 2.02                                    | 4.42                     | 2.45   | 1.80                                    | Sager et al. 2014 [31]        |
| po, cap, 30 mg                           | dextromethorphan                  | PM               | 848.57                        | 981.20  | 0.86                                    | 20.65                    | 32.30  | 0.64                                    | Schadel et al. 1995 [32]      |
| po, cap, 30 mg                           | dextromethorphan                  | EM               | 34.17                         | 38.36   | 0.89                                    | 4.48                     | 2.51   | 1.78                                    | Stage et al. 2018 [35]        |
| GMFE (dextromethorphan)                  |                                   |                  |                               |         | 1.61 (1.01–3.45)<br>10/14 with GMFE ≤ 2 |                          |        | 1.70 (1.01–2.97)<br>10/14 with GMFE ≤ 2 |                               |
| po, -, 30 mg                             | dextrorphan                       | EM               | 29.47                         | 20.71   | 1.42                                    | 3.76                     | 2.96   | 1.27                                    | Ermer et al. 2015 [10]        |
| po, tab, 30 mg                           | dextrorphan                       | EM               | 18.53                         | 22.02   | 0.84                                    | 3.35                     | 3.61   | 0.93                                    | Nakashima et al. 2007 [26]    |
| po, cap, 30 mg                           | dextrorphan                       | EM               | 23.10                         | 6.70    | 3.45                                    | 3.94                     | 1.63   | 2.42                                    | Sager et al. 2014 [31]        |
| po, cap, 30 mg                           | dextrorphan                       | EM               | 18.40                         | 19.56   | 0.94                                    | 4.34                     | 3.85   | 1.13                                    | Schadel et al. 1995 [32]      |
| GMFE (dextrorphan)                       |                                   |                  |                               |         | 1.78 (1.06–3.45)<br>3/4 with GMFE ≤ 2   |                          |        | 1.47 (1.08–2.42)<br>3/4 with GMFE ≤ 2   |                               |
| po, cap, 30 mg                           | dextrorphan <i>O</i> -glucuronide | EM               | 3634.81                       | 3033.65 | 1.20                                    | 536.57                   | 644.52 | 0.83                                    | Schadel et al. 1995 [32]      |
| GMFE (dextrorphan <i>O</i> -glucuronide) |                                   |                  |                               |         | 1.20                                    |                          |        | 1.20                                    |                               |

-: not given, AUC<sub>last</sub>: AUC from the time of the first concentration measurement to the last time point of concentration measurement, cap: capsule, C<sub>max</sub>: peak plasma concentration, CYP2D6: Cytochrome P450 2D6, EM: extensive metabolizer, inf: infusion, iv: intravenous, obs.: observed, PM: poor metabolizer, po: oral, pred: predicted.

**Table S3.5.2:** Predicted and observed AUC<sub>last</sub> and C<sub>max</sub> values and geometric mean fold errors (continued)

| Dosing                   | Molecule          | CYP2D6<br>status | AUC <sub>last</sub> [ng·h/mL] |         |                                         | C <sub>max</sub> [ng/mL] |        |                                         | Reference                     |
|--------------------------|-------------------|------------------|-------------------------------|---------|-----------------------------------------|--------------------------|--------|-----------------------------------------|-------------------------------|
|                          |                   |                  | Pred                          | Obs     | Pred/Obs                                | Pred                     | Obs    | Pred/Obs                                |                               |
|                          |                   |                  |                               |         | 1/1 with GMFE ≤ 2                       |                          |        | 1/1 with GMFE ≤ 2                       |                               |
| po, tab, 60 mg           | dextrorphan-total | EM               | 8053.06                       | 5085.21 | 1.58                                    | 465.71                   | 959.10 | 0.49                                    | Antecip Bioventures 2016 [24] |
| po, -, 60 mg             | dextrorphan-total | EM               | 5902.53                       | 5449.79 | 1.08                                    | 474.19                   | 489.35 | 0.97                                    | Feld et al. 2013 [11]         |
| po, cap, 80 mg           | dextrorphan-total | EM               | 3658.56                       | 3805.82 | 0.96                                    | 595.96                   | 883.78 | 0.67                                    | Tenneze et al. 1999 [39]      |
| GMFE (dextrorphan-total) |                   |                  |                               |         | 1.23 (1.04–1.58)<br>3/3 with GMFE ≤ 2   |                          |        | 1.52 (1.03–2.04)<br>2/3 with GMFE ≤ 2   |                               |
| Overall GMFE             |                   |                  |                               |         | 1.57 (1.01–3.45)<br>18/23 with GMFE ≤ 2 |                          |        | 1.61 (1.01–2.97)<br>17/22 with GMFE ≤ 2 |                               |

-: not given, AUC<sub>last</sub>: AUC from the time of the first concentration measurement to the last time point of concentration measurement, cap: capsule, C<sub>max</sub>: peak plasma concentration, CYP2D6: Cytochrome P450 2D6, EM: extensive metabolizer, inf: infusion, iv: intravenous, obs.: observed, PM: poor metabolizer, po: oral, pred: predicted.

## S3.6 Sensitivity Analysis

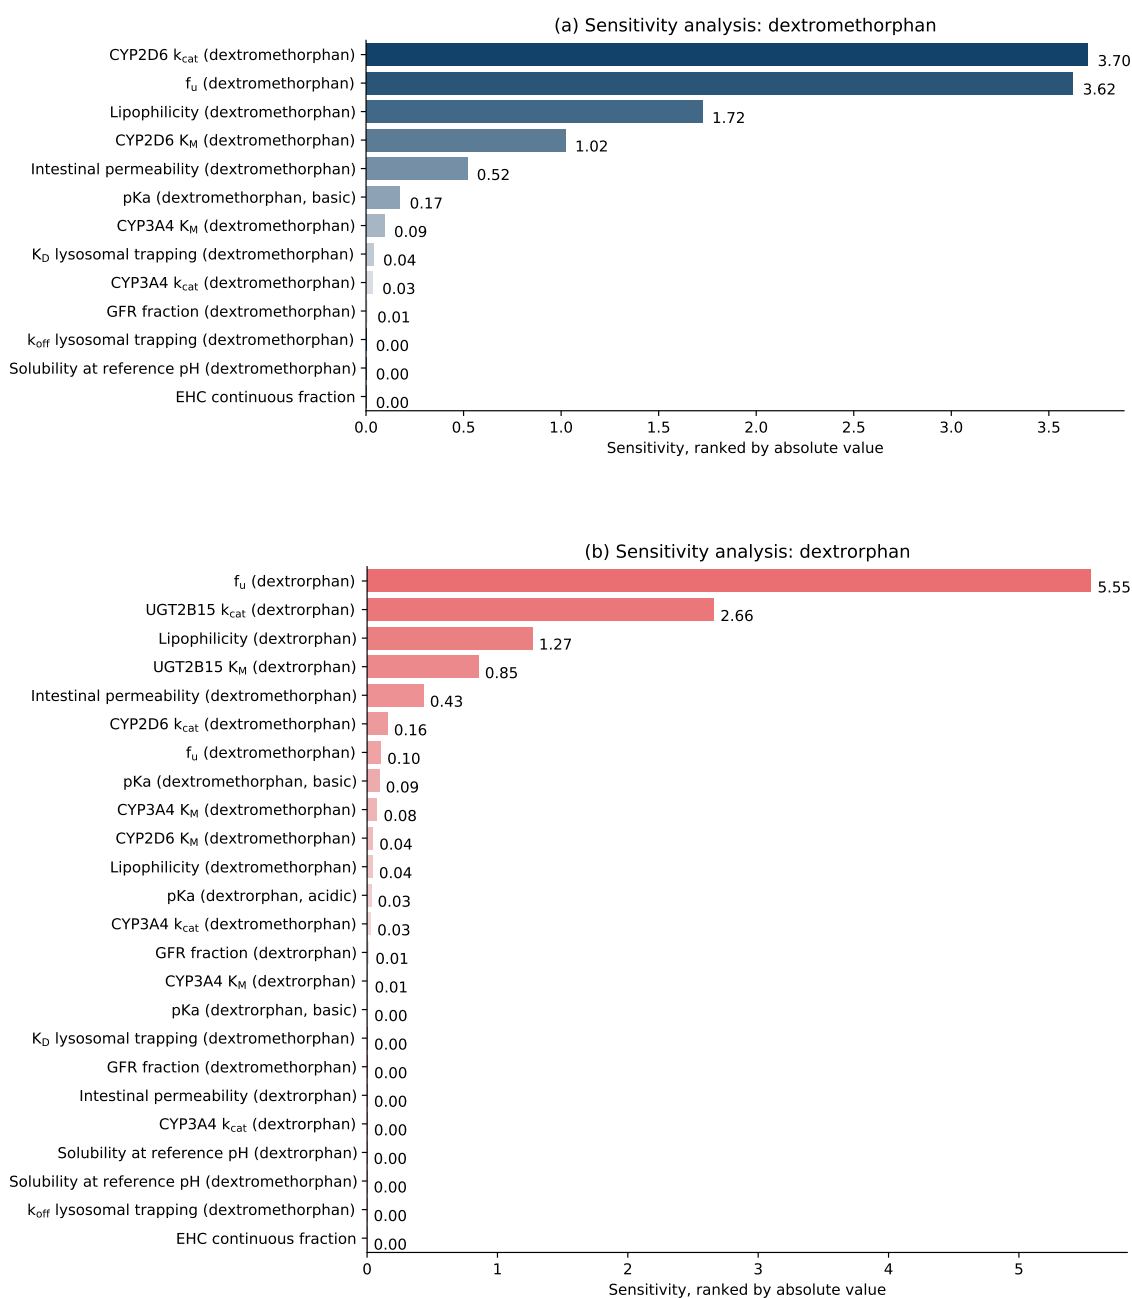

**Figure S3.6.7:** Sensitivity analysis of the dextromethorphan model. A sensitivity of +1.0 signifies that a 10% increase of the examined parameter value causes a 10% increase of the simulated  $AUC_{0-24\text{ h}}$ . CYP2D6: Cytochrome P450 2D6, CYP3A4: cytochrome P450 3A4,  $f_u$ : fraction unbound, GFR: glomerular filtration rate, intest.: intestinal,  $k_{cat}$ : catalytic rate constant,  $K_D$ : dissociation constant, Michaelis-Menten constant ( $K_M$ ): Michaelis-Menten constant,  $k_{off}$ : dissociation rate constant, pKa: acid dissociation constant.

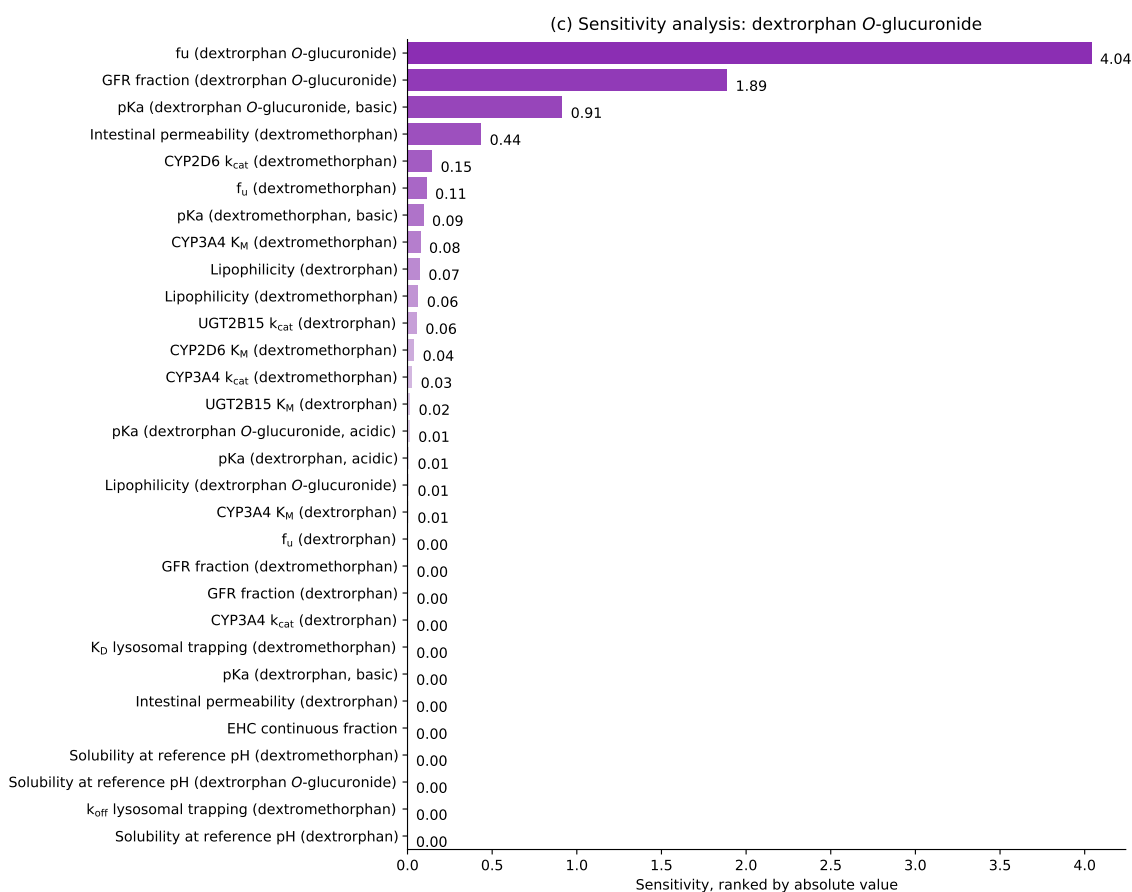

**Figure S3.6.8:** Sensitivity analysis of the dextromethorphan model. A sensitivity of +1.0 signifies that a 10% increase of the examined parameter value causes a 10% increase of the simulated  $AUC_{0-24\text{ h}}$ . CYP2D6: Cytochrome P450 2D6, CYP3A4: cytochrome P450 3A4,  $f_u$ : fraction unbound, GFR: glomerular filtration rate, intest.: intestinal,  $k_{cat}$ : catalytic rate constant,  $K_D$ : dissociation constant,  $K_M$ : Michaelis-Menten constant,  $k_{off}$ : dissociation rate constant, pKa: acid dissociation constant.

## S4 DGI Model Building

### S4.1 Population $k_{cat}$ Values

**Table S4.1.1:** Dextromethorphan population CYP2D6  $k_{cat}$  values for CYP2D6 activity scores (ASs)

| Activity Score | Projected Phenotype | $k_{cat} \rightarrow dxt$<br>[1/min] | $k_{cat}$ Percentage of Reference (AS = 2) [%] |
|----------------|---------------------|--------------------------------------|------------------------------------------------|
| 0              | PM                  | 0.0                                  | 0                                              |
| 0.25           | IM                  | 5.3                                  | 2                                              |
| 0.5            |                     | 32.9                                 | 14                                             |
| 1              |                     | 96.6                                 | 40                                             |
| 1.25           | NM                  | 115.2                                | 48                                             |
| 1.5            |                     | 151.8                                | 63                                             |
| 2              |                     | 242.5                                | 100                                            |
| 3              | UM                  | 413.2                                | 170                                            |

AS: CYP2D6 activity score, CYP2D6: Cytochrome P450 2D6, IM: intermediate metabolizer,  $k_{cat}$ : catalytic rate constant, NM: normal metabolizer, PM: poor metabolizer, UM: ultrarapid metabolizer.

## S4.2 DGI Clinical Study Data

**Table S4.2.2:** Dextromethorphan DGI population study table

| Route        | Dose [mg] | n  | Females [%] | Age [years] | Weight [kg] | Height [cm] | Metabolite measured | CYP2D6   |      |              | Dataset           | References           |
|--------------|-----------|----|-------------|-------------|-------------|-------------|---------------------|----------|------|--------------|-------------------|----------------------|
|              |           |    |             |             |             |             |                     | Genotype | AS   | P. Phenotype |                   |                      |
| po (cap, sd) | 30        | 6  | 33          | 22 (20-26)  | -           | -           | dtg                 | -        | -    | EM           | test              | Capon 1996 [6]       |
| po (cap, sd) | 30        | 6  | 33          | 22 (20-26)  | -           | -           | dtg                 | -        | -    | PM           | test              | Capon 1996 [6]       |
| po (cap, sd) | 30        | 16 | 50          | 34          | 73          | 175         | -                   | †        | 1.25 | NM           | test <sup>a</sup> | Gazzaz 2018 [13]     |
| po (-, sd)   | 30        | 11 | 55          | 31          | 79          | -           | dtg                 | -        | -    | EM           | test <sup>a</sup> | Gorski 2004 [14]     |
| po (-, sd)   | 30        | 1  | 0           | 31          | 79          | -           | dtg                 | -        | -    | PM           | test <sup>a</sup> | Gorski 2004 [14]     |
| po (cap, sd) | 30        | 11 | 0           | (18-55)     | -           | -           | -                   | *1/*1    | 2    | NM           | test              | Yamazaki 2017 [44]   |
| po (cap, sd) | 30        | 12 | 0           | (18-55)     | -           | -           | -                   | *10/*10  | 0.5  | IM           | test              | Yamazaki 2017 [44]   |
| po (tab, sd) | 15        | 6  | 50          | 24 (22-26)  | 60          | -           | -                   | *1/*1    | 2    | NM           | training          | Qiu 2016 [30]        |
| po (tab, sd) | 15        | 6  | 50          | 24 (22-26)  | 60          | -           | -                   | *1/*10   | 1.25 | NM           | training          | Qiu 2016 [30]        |
| po (tab, sd) | 15        | 6  | 50          | 24 (22-26)  | 60          | -           | -                   | *10/*10  | 0.5  | IM           | training          | Qiu 2016 [30]        |
| po (sol, sd) | 5         | 17 | 53          | 27 (18-42)  | -           | -           | dxt                 | †        | 2    | NM           | test              | Storelli 2018 [36]   |
| po (sol, sd) | 5         | 16 | 75          | 24 (21-27)  | -           | -           | dxt                 | †        | 1    | IM           | test              | Storelli 2018 [36]   |
| po (cap, sd) | 3/kg      | 6  | 33          | (21-34)     | -           | -           | dxt, dtg            | *1/*1    | 2    | NM           | training          | Zawertailo 2010 [45] |

Values for age, weight and height are given as mean (range), -: not given, †: full genotype provided in publication, <sup>a</sup>: cocktail study, AS: CYP2D6 activity score, bid: twice daily, cap: capsule, CYP2D6: Cytochrome P450 2D6, DGI: drug-gene interaction, dxt: dextrorphan, dxt-glu: dextrorphan *O*-glucuronide, dtg: total dextrorphan, IM: intermediate metabolizer, inf: infusion, iv: intravenous, p.: projected, PM: poor metabolizer, po: oral, sd: single dose, sol: oral solution.

# S5 DGI Model Evaluation

## S5.1 Plasma Concentration-Time Profiles

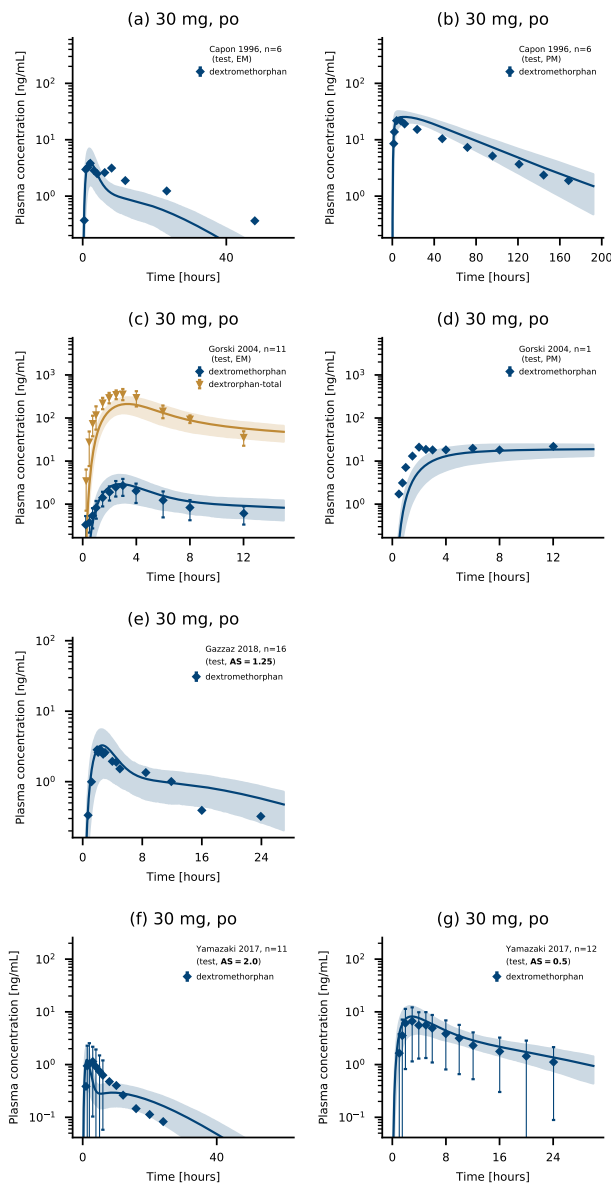

**Figure S5.1.1:** Dextromethorphan and total dextromethorphan plasma concentrations of the modeled CYP2D6 drug-gene interaction. Predictions using the population  $k_{cat}$  of dextromethorphan and total dextromethorphan (dextromethorphan + dextromethorphan *O*-glucuronide) plasma concentration-time profiles of the CYP2D6 drug-gene interaction (DGI) studies, compared to observed data (semilogarithmic representation). Population predictions ( $n=1000$ ) are shown as lines with ribbons (arithmetic mean  $\pm$  standard deviation (SD)), symbols represent the corresponding observed data  $\pm$  SD. AS: activity score, EM: extensive metabolizer, PM: poor metabolizer, oral (po): oral.

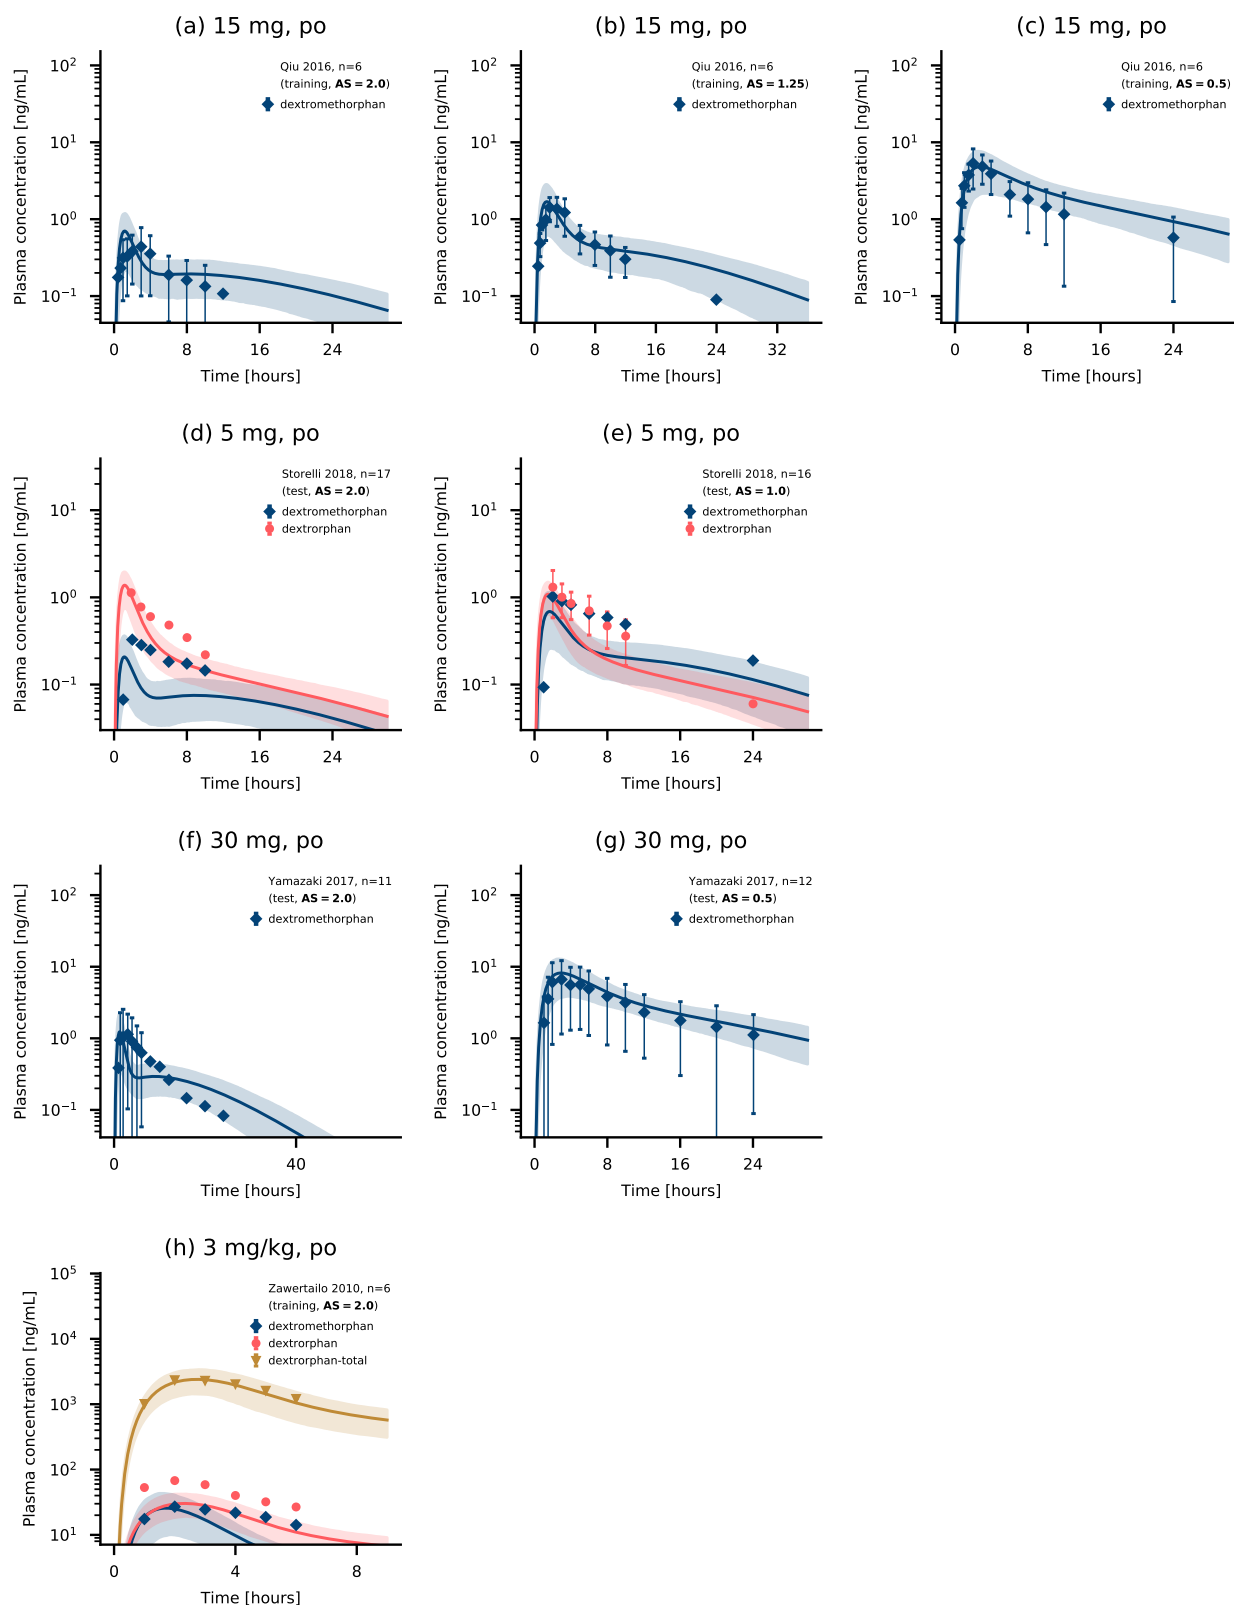

**Figure S5.1.2:** Dextromethorphan, dextrorphan and total dextrorphan plasma concentrations of the modeled CYP2D6 drug-gene interaction. Predictions using the population  $k_{cat}$  of dextromethorphan and total dextrorphan (dextrorphan + dextrorphan *O*-glucuronide) plasma concentration-time profiles of the CYP2D6 DGI studies, compared to observed data (semilogarithmic representation). Population predictions ( $n=1000$ ) are shown as lines with ribbons (arithmetic mean  $\pm$  standard deviation (SD)), symbols represent the corresponding observed data  $\pm$  SD. AS: activity score, po: oral.



## S5.2 Goodness-of-Fit Plots: Plasma Concentrations

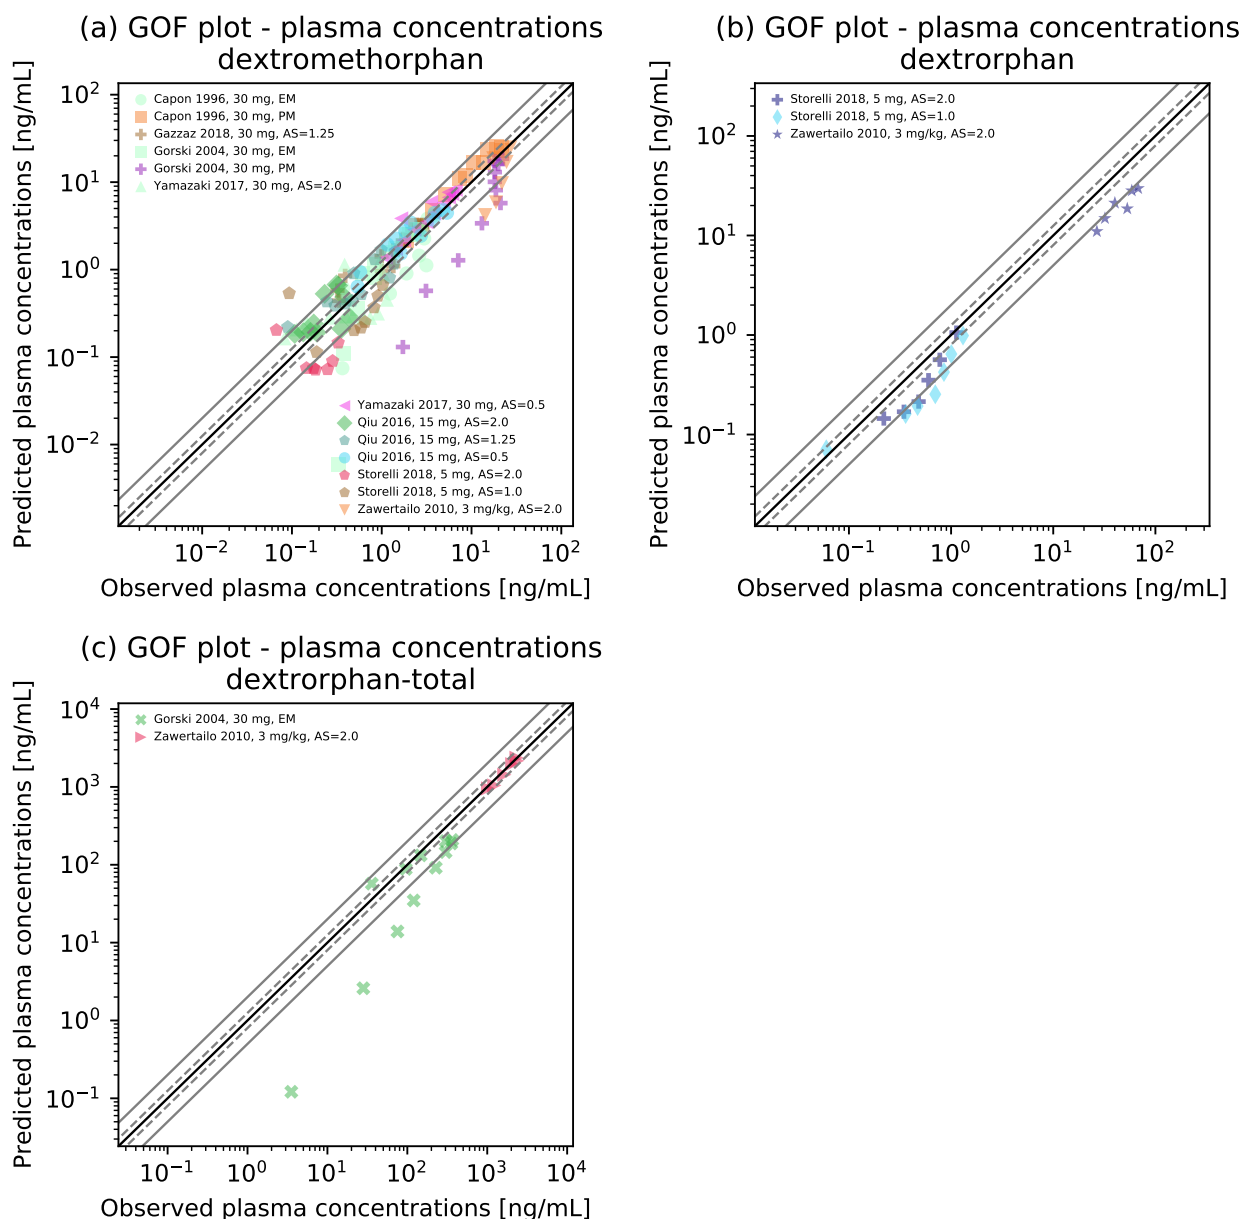

**Figure S5.2.3:** Goodness-of-fit plots. Predicted versus observed plasma concentration values for (a) dextromethorphan, (b) dextroprphan and (c) total dextroprphan (dextroprphan + dextroprphan *O*-glucuronide) for all studies of the DGI dataset. The solid black line marks the line of identity, the dashed gray lines mark the 0.8- to 1.25-fold range, the solid gray lines indicate the 0.5- to 2-fold range. Colored symbols represent the study population given in the legend. AS: CYP2D6 activity score, EM: extensive metabolizer, PM: poor metabolizer.

## S5.3 MRD of Plasma Concentration Predictions

**Table S5.3.1:** Mean relative deviation of plasma concentration predictions

| Dosing                  | Molecule          | CYP2D6 status | MRD              | Reference                   |
|-------------------------|-------------------|---------------|------------------|-----------------------------|
| po, cap, 30 mg          | dextromethorphan  | EM            | 2.00             | Capon et al. 1996 [6]       |
| po, cap, 30 mg          | dextromethorphan  | PM            | 1.34             | Capon et al. 1996 [6]       |
| po, cap, 30 mg          | dextromethorphan  | AS=1.25       | 1.40             | Gazzaz et al. 2018 [13]     |
| po, -, 30 mg            | dextromethorphan  | EM            | 3.68             | Gorski et al. 2004 [14]     |
| po, -, 30 mg            | dextromethorphan  | PM            | 3.36             | Gorski et al. 2004 [14]     |
| po, cap, 30 mg          | dextromethorphan  | AS=2.0        | 1.96             | Yamazaki et al. 2017 [44]   |
| po, cap, 30 mg          | dextromethorphan  | AS=0.5        | 1.46             | Yamazaki et al. 2017 [44]   |
| po, tab, 15 mg          | dextromethorphan  | AS=2.0        | 1.59             | Qiu et al. 2016 [30]        |
| po, tab, 15 mg          | dextromethorphan  | AS=1.25       | 1.59             | Qiu et al. 2016 [30]        |
| po, tab, 15 mg          | dextromethorphan  | AS=0.5        | 1.38             | Qiu et al. 2016 [30]        |
| po, sol, 5 mg           | dextromethorphan  | AS=2.0        | 2.68             | Storelli et al. 2018 [37]   |
| po, sol, 5 mg           | dextromethorphan  | AS=1.0        | 2.47             | Storelli et al. 2018 [37]   |
| po, cap, 3 mg/kg        | dextromethorphan  | AS=2.0        | 2.11             | Zawertailo et al. 2010 [45] |
| MRD (dextromethorphan)  |                   |               | 2.08 (1.34–3.68) | 8/13 with MRD $\leq$ 2      |
| po, sol, 5 mg           | dextrorphan       | AS=2.0        | 1.69             | Storelli et al. 2018 [37]   |
| po, sol, 5 mg           | dextrorphan       | AS=1.0        | 1.98             | Storelli et al. 2018 [37]   |
| po, cap, 3 mg/kg        | dextrorphan       | AS=2.0        | 2.26             | Zawertailo et al. 2010 [45] |
| MRD (dextrorphan)       |                   |               | 1.98 (1.69–2.26) | 2/3 with MRD $\leq$ 2       |
| po, -, 30 mg            | dextrorphan-total | EM            | 4.26             | Gorski et al. 2004 [14]     |
| po, cap, 3 mg/kg        | dextrorphan-total | AS=2.0        | 1.10             | Zawertailo et al. 2010 [45] |
| MRD (dextrorphan-total) |                   |               | 2.68 (1.10–4.26) | 1/2 with MRD $\leq$ 2       |
| Overall MRD             |                   |               | 2.13 (1.10–4.26) | 11/18 with MRD $\leq$ 2     |

-: not given, AS: CYP2D6 activity score, cap: capsule, CYP2D6: Cytochrome P450 2D6, EM: extensive metabolizer, inf: infusion, iv: intravenous, PM: poor metabolizer, po: oral, sol: oral solution.

## S5.4 $AUC_{last}$ and $C_{max}$ Goodness-of-Fit Plots

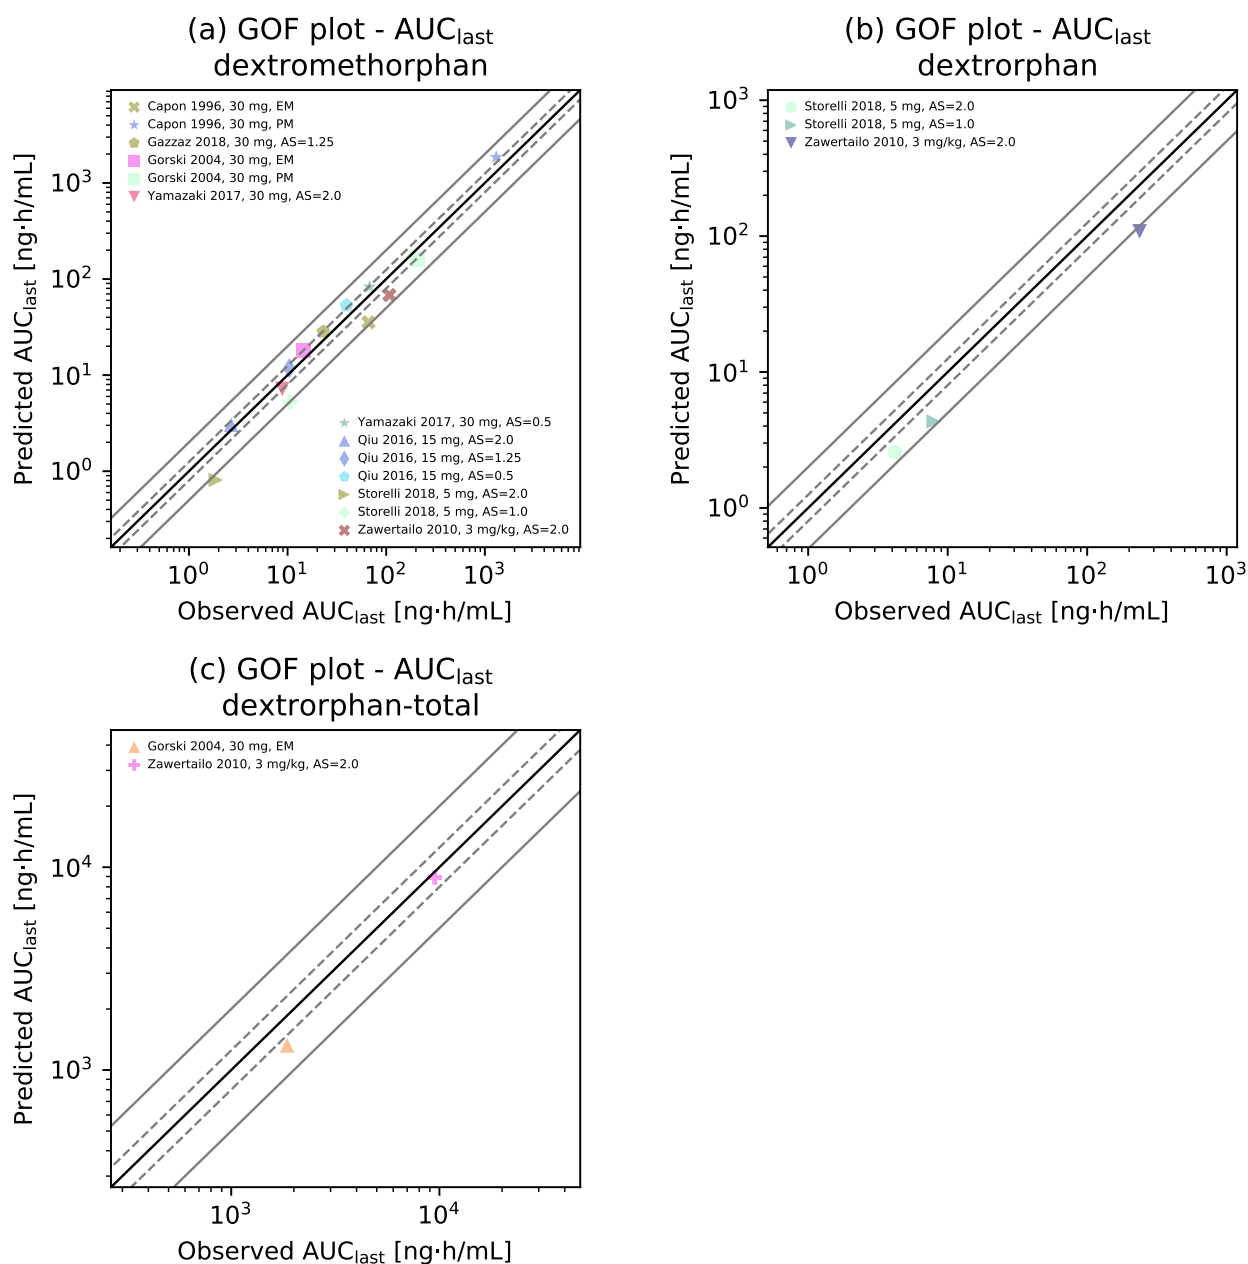

**Figure S5.4.4:** AUC correlation plots. Predicted versus observed  $AUC_{last}$  for (a) dextromethorphan, (b) dextroprphan and (c) total dextroprphan (dextroprphan + dextroprphan *O*-glucuronide) for all studies of the DGI dataset. The solid black line marks the line of identity, the dashed gray lines mark the 0.8- to 1.25-fold range, the solid gray lines indicate the 0.5- to 2-fold range. Colored symbols represent the study population given in the legend. AS: CYP2D6 activity score,  $AUC_{last}$ : AUC from the time of the first concentration measurement to the last time point of concentration measurement, EM: extensive metabolizer, PM: poor metabolizer.

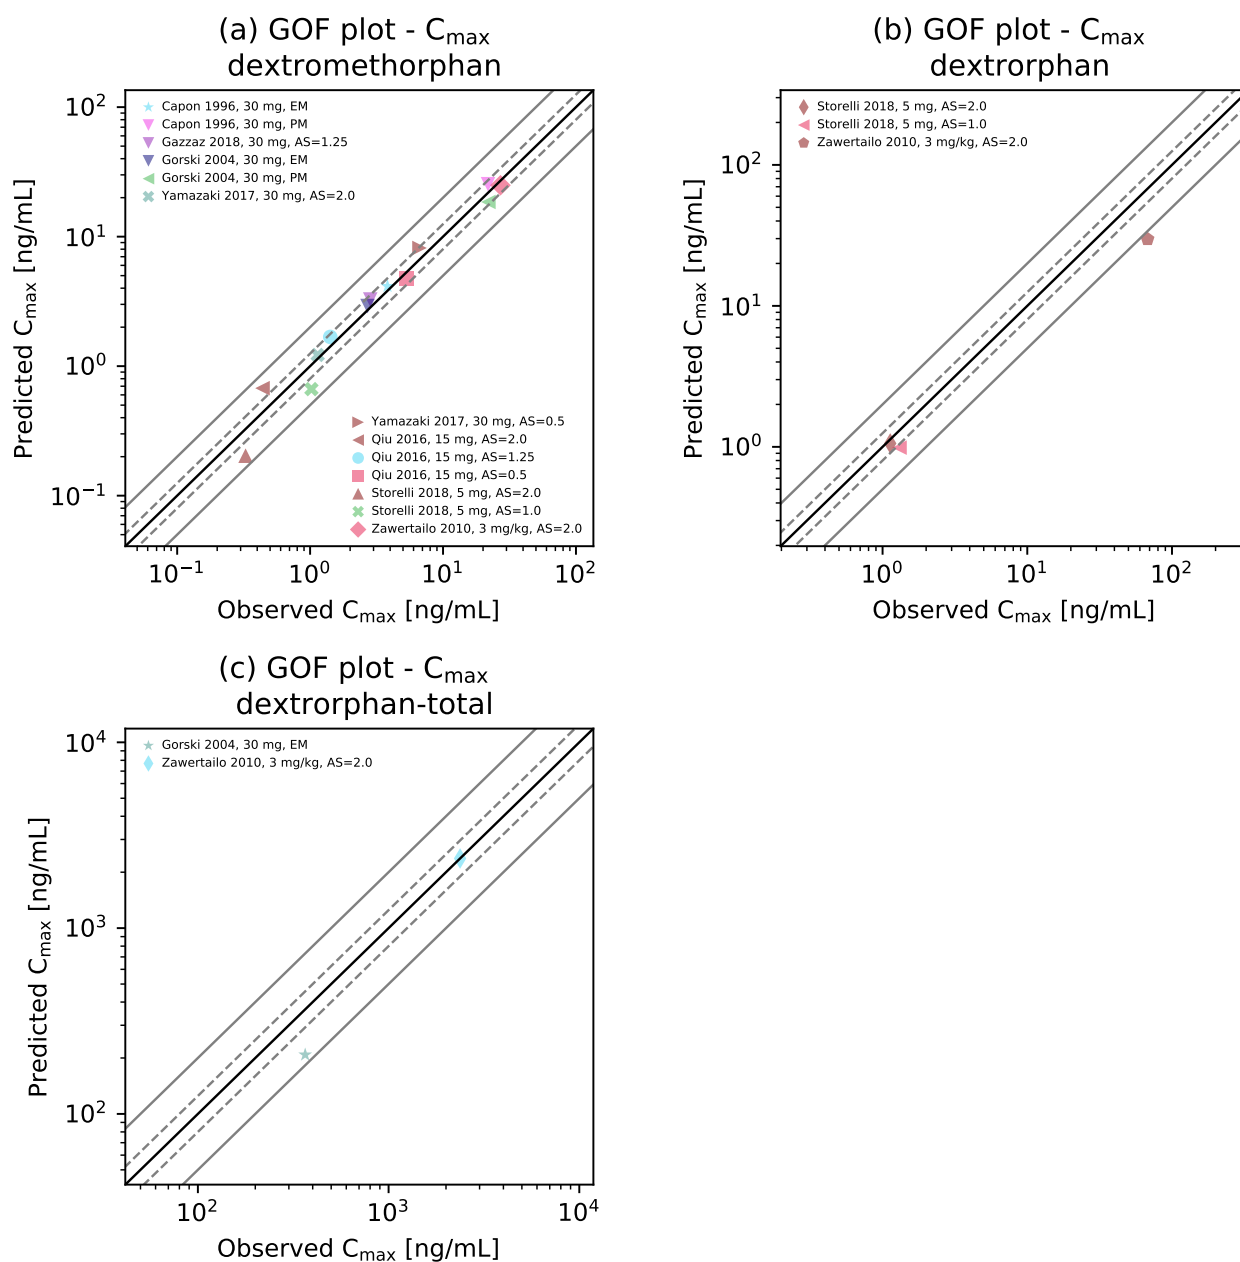

**Figure S5.4.5:**  $C_{max}$  correlation plots. Predicted versus observed  $C_{max}$  for (a) dextromethorphan, (b) dextrorphan and (c) total dextrorphan (dextrorphan + dextrorphan *O*-glucuronide) for all studies of the DGI dataset. The solid black line marks the line of identity, the dashed gray lines mark the 0.8- to 1.25-fold range, the solid gray lines indicate the 0.5- to 2-fold range. Colored symbols represent the study population given in the legend. AS: CYP2D6 activity score,  $C_{max}$ : peak plasma concentration, EM: extensive metabolizer, PM: poor metabolizer.

## S5.5 GMFE of Predicted AUC<sub>last</sub> and C<sub>max</sub> Values

**Table S5.5.2:** Predicted and observed AUC<sub>last</sub> and C<sub>max</sub> values and geometric mean fold errors

| Dosing                  | Molecule          | CYP2D6 status | AUC <sub>last</sub> [ng-h/ml] |         |                                         | C <sub>max</sub> [ng/ml] |        |                                         | Reference                   |  |
|-------------------------|-------------------|---------------|-------------------------------|---------|-----------------------------------------|--------------------------|--------|-----------------------------------------|-----------------------------|--|
|                         |                   |               | Pred                          | Obs     | Pred/Obs                                | Pred                     | Obs    | Pred/Obs                                |                             |  |
| po, cap, 30 mg          | dextromethorphan  | EM            | 34.02                         | 66.20   | 0.51                                    | 3.50                     | 3.82   | 0.92                                    | Capon et al. 1996 [6]       |  |
| po, cap, 30 mg          | dextromethorphan  | PM            | 1840.48                       | 1304.44 | 1.41                                    | 24.92                    | 21.81  | 1.14                                    | Capon et al. 1996 [6]       |  |
| po, -, 30 mg            | dextromethorphan  | EM            | 17.77                         | 14.62   | 1.22                                    | 2.98                     | 2.70   | 1.10                                    | Gorski et al. 2004 [14]     |  |
| po, -, 30 mg            | dextromethorphan  | PM            | 171.48                        | 208.95  | 0.82                                    | 20.09                    | 21.93  | 0.92                                    | Gorski et al. 2004 [14]     |  |
| po, cap, 30 mg          | dextromethorphan  | AS=1.25       | 28.60                         | 23.09   | 1.24                                    | 3.45                     | 2.83   | 1.22                                    | Gazzaz et al. 2018 [13]     |  |
| po, cap, 30 mg          | dextromethorphan  | AS=2.0        | 7.34                          | 8.83    | 0.83                                    | 1.13                     | 1.14   | 0.99                                    | Yamazaki et al. 2017 [44]   |  |
| po, cap, 30 mg          | dextromethorphan  | AS=0.5        | 85.58                         | 67.73   | 1.26                                    | 8.87                     | 6.65   | 1.33                                    | Yamazaki et al. 2017 [44]   |  |
| po, tab, 15 mg          | dextromethorphan  | AS=2.0        | 2.91                          | 2.68    | 1.08                                    | 0.62                     | 0.44   | 1.41                                    | Qiu et al. 2016 [30]        |  |
| po, tab, 15 mg          | dextromethorphan  | AS=1.25       | 12.42                         | 10.41   | 1.19                                    | 1.72                     | 1.42   | 1.22                                    | Qiu et al. 2016 [30]        |  |
| po, tab, 15 mg          | dextromethorphan  | AS=0.5        | 54.16                         | 39.65   | 1.37                                    | 5.12                     | 5.33   | 0.96                                    | Qiu et al. 2016 [30]        |  |
| po, sol, 5 mg           | dextromethorphan  | AS=2.0        | 0.80                          | 1.87    | 0.43                                    | 0.20                     | 0.33   | 0.62                                    | Storelli et al. 2018 [37]   |  |
| po, sol, 5 mg           | dextromethorphan  | AS=1.0        | 5.42                          | 10.59   | 0.51                                    | 0.65                     | 1.02   | 0.63                                    | Storelli et al. 2018 [37]   |  |
| po, cap, 3 mg/kg        | dextromethorphan  | AS=2.0        | 69.64                         | 107.81  | 0.65                                    | 25.94                    | 27.04  | 0.96                                    | Zawertailo et al. 2010 [45] |  |
| GMFE (dextromethorphan) |                   |               |                               |         | 1.46 (1.08–2.33)<br>12/13 with GMFE ≤ 2 |                          |        | 1.22 (1.01–1.61)<br>13/13 with GMFE ≤ 2 |                             |  |
| po, sol, 5 mg           | dextrorphan       | AS=2.0        | 2.60                          | 4.19    | 0.62                                    | 1.38                     | 1.13   | 1.22                                    | Storelli et al. 2018 [37]   |  |
| po, sol, 5 mg           | dextrorphan       | AS=1.0        | 4.37                          | 7.94    | 0.55                                    | 1.06                     | 1.31   | 0.81                                    | Storelli et al. 2018 [37]   |  |
| po, cap, 3 mg/kg        | dextrorphan       | AS=2.0        | 109.82                        | 237.65  | 0.46                                    | 30.63                    | 67.77  | 0.45                                    | Zawertailo et al. 2010 [45] |  |
| GMFE (dextrorphan)      |                   |               |                               |         | 1.87 (1.61–2.17)<br>2/3 with GMFE ≤ 2   |                          |        | 1.52 (1.08–2.22)<br>2/3 with GMFE ≤ 2   |                             |  |
| po, -, 30 mg            | dextrorphan-total | EM            | 1307.35                       | 1854.58 | 0.70                                    | 214.79                   | 365.28 | 0.59                                    | Gorski et al. 2004 [14]     |  |

-: not given, AS: CYP2D6 activity score, AUC<sub>last</sub>: AUC from the time of the first concentration measurement to the last time point of concentration measurement, cap: capsule, C<sub>max</sub>: peak plasma concentration, CYP2D6: Cytochrome P450 2D6, EM: extensive metabolizer, inf: infusion, iv: intravenous, obs.: observed, PM: poor metabolizer, po: oral, pred: predicted.

**Table S5.5.2:** Predicted and observed AUC<sub>last</sub> and C<sub>max</sub> values and geometric mean fold errors (continued)

| Dosing                   | Molecule          | CYP2D6<br>status | AUC <sub>last</sub> [ng·h/ml]           |         |          | C <sub>max</sub> [ng/ml]                |         |          | Reference                   |
|--------------------------|-------------------|------------------|-----------------------------------------|---------|----------|-----------------------------------------|---------|----------|-----------------------------|
|                          |                   |                  | Pred                                    | Obs     | Pred/Obs | Pred                                    | Obs     | Pred/Obs |                             |
| cap, 3 mg/kg             | dextrorphan-total | AS=2.0           | 8998.15                                 | 9490.66 | 0.95     | 2427.95                                 | 2370.93 | 1.02     | Zawertailo et al. 2010 [45] |
| GMFE (dextrorphan-total) |                   |                  | 1.24 (1.05–1.43)<br>2/2 with GMFE ≤ 2   |         |          | 1.36 (1.02–1.69)<br>2/2 with GMFE ≤ 2   |         |          |                             |
| Overall GMFE             |                   |                  | 1.50 (1.05–2.33)<br>16/18 with GMFE ≤ 2 |         |          | 1.28 (1.01–2.22)<br>17/18 with GMFE ≤ 2 |         |          |                             |

-: not given, AS: CYP2D6 activity score, AUC<sub>last</sub>: AUC from the time of the first concentration measurement to the last time point of concentration measurement, cap: capsule, C<sub>max</sub>: peak plasma concentration, CYP2D6: Cytochrome P450 2D6, EM: extensive metabolizer, inf: infusion, iv: intravenous, obs.: observed, PM: poor metabolizer, po: oral, pred: predicted.

## S5.6 DGI $AUC_{last}$ and $C_{max}$ Ratio Plots

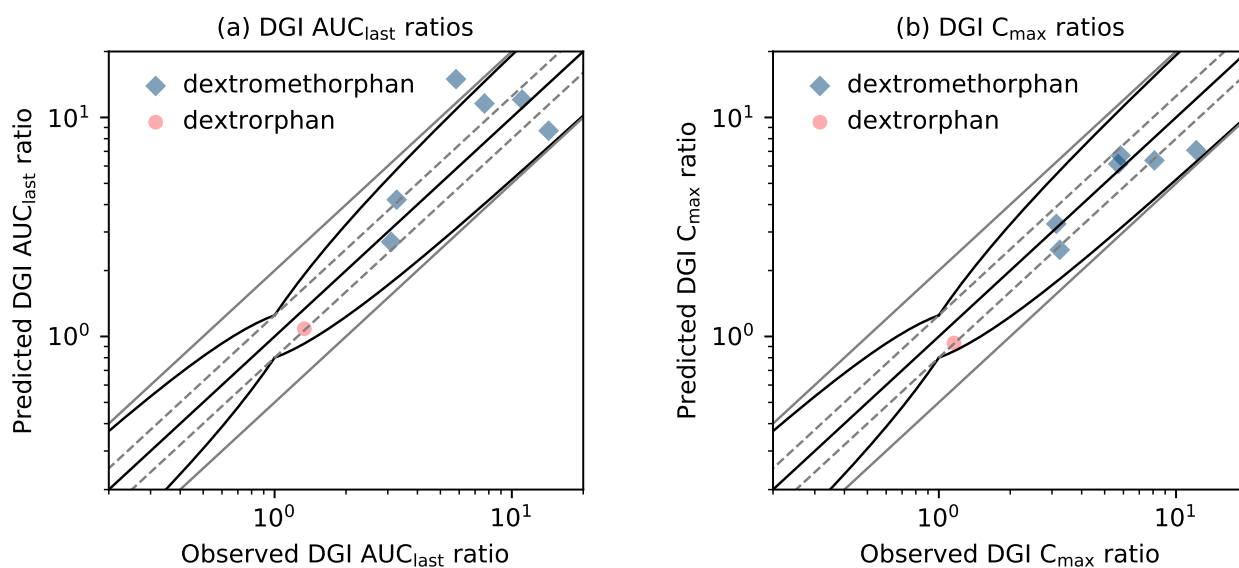

**Figure S5.6.6:** Predicted versus observed dextromethorphan DGI ratios. Comparison of predicted versus observed (a)  $AUC_{last}$  ratios and (b)  $C_{max}$  ratios for dextromethorphan CYP2D6 DGI-studies. The straight black line indicates the line of identity, curved black lines show prediction success limits proposed by Guest et al. including 1.25-fold variability [15]. Solid light gray lines indicate 2-fold deviation, dashed light gray lines show 1.25-fold deviation.  $AUC_{last}$ : AUC from the time of the first concentration measurement to the last time point of concentration measurement,  $C_{max}$ : peak plasma concentration, DGI: drug-gene interaction

## S5.7 GMFE of Predicted DGI AUC<sub>last</sub> and C<sub>last</sub> Ratios

**Table S5.7.3:** Geometric mean fold error of predicted DGI AUC<sub>last</sub> and C<sub>max</sub> ratios

| Molecule                                                                             | Dosing         | CYP2D6 |          |              | AUC <sub>last</sub> ratio |       |          | C <sub>max</sub> ratio |       |          | Reference                 |
|--------------------------------------------------------------------------------------|----------------|--------|----------|--------------|---------------------------|-------|----------|------------------------|-------|----------|---------------------------|
|                                                                                      |                | AS     | Genotype | p. Phenotype | Pred                      | Obs   | Pred/Obs | Pred                   | Obs   | Pred/Obs |                           |
| dextromethorphan                                                                     | 30 mg, cap, sd | -      | -        | PM           | 16.55                     | 5.82  | 2.84     | 7.2                    | 5.71  | 1.26     | Capon et al. 1996 [6]     |
| dextromethorphan                                                                     | 30 mg, -, sd   | -      | -        | PM           | 10.67                     | 14.29 | 0.75     | 7.02                   | 8.11  | 0.87     | Gorski et al. 2004 [14]   |
| dextromethorphan                                                                     | 5 mg, sol, sd  | 1.0    | †        | IM           | 4.37                      | 3.27  | 1.34     | 3.2                    | 3.13  | 1.02     | Storelli et al. 2018 [37] |
| dextrorphan                                                                          | 5 mg, sol, sd  | 1.0    | †        | IM           | 1.07                      | 1.33  | 0.8      | 0.92                   | 1.16  | 0.8      | Storelli et al. 2018 [37] |
| dextromethorphan                                                                     | 15 mg, tab, sd | 1.25   | *1/*10   | NM           | 2.97                      | 3.1   | 0.96     | 2.94                   | 3.23  | 0.91     | Qiu et al. 2016 [30]      |
| dextromethorphan                                                                     | 15 mg, tab, sd | 0.5    | *10/*10  | IM           | 14.01                     | 11.06 | 1.27     | 8.94                   | 12.17 | 0.73     | Qiu et al. 2016 [30]      |
| dextromethorphan                                                                     | 30 mg, cap, sd | 0.5    | *10/*10  | IM           | 12.07                     | 7.67  | 1.57     | 8.17                   | 5.84  | 1.4      | Yamazaki et al. 2017 [44] |
| Overall GMFE                                                                         |                |        |          |              | 1.45 (1.04–2.84)          |       |          | 1.21 (1.02–1.40)       |       |          |                           |
| Ratios within the limits of <i>Guest et al.</i> [15] (including 1.25-fold deviation) |                |        |          |              | 6/7 with GMFE ≤ 2         |       |          | 7/7 with GMFE ≤ 2      |       |          |                           |
|                                                                                      |                |        |          |              | 6/7                       |       |          | 7/7                    |       |          |                           |

-, not available, †: full genotype provided in publication, AS: CYP2D6 activity score, AUC<sub>last</sub>: AUC from the time of the first concentration measurement to the last time point of concentration measurement, cap: capsule, C<sub>max</sub>: peak plasma concentration, CYP2D6: Cytochrome P450 2D6, obs: observed, IM: intermediate metabolizer, NM: normal metabolizer, p.: projected, PM: poor metabolizer, pred: predicted, sol: oral solution, sd: single dose.



# S6 Interindividual Variability Within Activity Score Groups

## S6.1 Exploratory Analysis of Reported Individual Plasma Concentration-Time Profiles

In the PhD thesis by Frank [12], plasma concentration-time profiles for dextromethorphan, dextrorphan and total dextrorphan were reported for five cocktail studies (A–E) for a total of 84 individuals. To assess the plausibility of the reported individual profiles,  $AUC_{last}$  and  $C_{max}$  values were calculated for all observed dextromethorphan profiles. The authors assumed that  $AUC_{last}$  and  $C_{max}$  values would generally decrease with increasing CYP2D6 activity scores. This was true for four (A, C, D and E) of the five studies, as depicted in Figure S6.1.1. As  $AUC_{last}$  and  $C_{max}$  values clearly violated this assumption, study B was excluded from the subsequent modeling steps and analyses.

Exploratory analysis of dextromethorphan  $AUC_{last}$  and  $C_{max}$  values

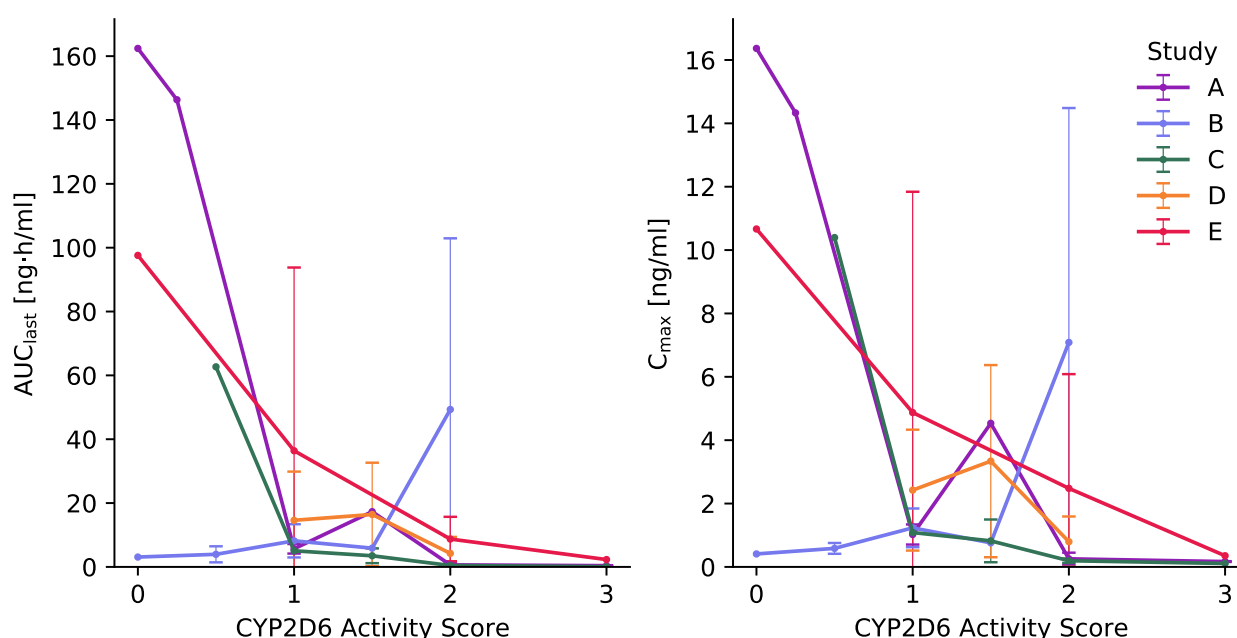

**Figure S6.1.1:** Exploratory analysis of dextromethorphan  $AUC_{last}$  and  $C_{max}$  values. Observed  $AUC_{last}$  (left) and  $C_{max}$  values (right panel) for dextromethorphan for individual profiles. Lines and symbols represent the observed  $AUC_{last}$  and  $C_{max}$  data points per activity score  $AUC_{last}$ : AUC from the time of the first concentration measurement to the last time point of concentration measurement,  $C_{max}$ : peak plasma concentration.

## S6.2 Mean Individual $k_{cat}$ Values

**Table S6.2.1:** CYP2D6 activity scores in the DGI study population with population  $k_{cat}$  values and mean individual optimized  $k_{cat}$  values.

| Activity Score | Projected Phenotype | Individuals (n) | Population $k_{cat}$ [1/min] | Mean Individual $k_{cat}$ [1/min] |
|----------------|---------------------|-----------------|------------------------------|-----------------------------------|
| 0              | PM                  | 2               | 0.0                          | -                                 |
| 0.25           | IM                  | 1               | 5.3                          | -                                 |
| 0.5            |                     | 1               | 32.9                         | -                                 |
| 1              |                     | 25              | 96.6                         | 106.3 (2.5)                       |
| 1.25           | NM                  | 0               | 115.2                        | -                                 |
| 1.5            |                     | 7               | 151.8                        | 168.5 (1.9)                       |
| 2              |                     | 26              | 242.5                        | 260.0 (2.1)                       |
| 3              | UM                  | 4               | 413.2                        | 462 (1.3)                         |

Individual optimized  $k_{cat}$  values are given as mean (SD), IM: intermediate metabolizer,  $k_{cat}$ : catalytic rate constant, NM: normal metabolizer, PM: poor metabolizer, n: number of individuals, UM: ultrarapid metabolizer.

## S6.3 Clinical Study Data

**Table S6.3.2:** Dextromethorphan cocktail study table [12]

| Subject ID | Sex  | Age [years] | Weight [kg] | Height [cm] | Ethnicity | CYP2D6   |      |              | Dataset  |
|------------|------|-------------|-------------|-------------|-----------|----------|------|--------------|----------|
|            |      |             |             |             |           | genotype | AS   | p. phenotype |          |
| A01        | male | 42          | 84          | 188         | caucasian | *4/*10   | 0.25 | IM           | training |
| A02        | male | 27          | 65          | 171         | caucasian | *1/*41   | 1.5  | NM           | test     |
| A03        | male | 34          | 77          | 189         | caucasian | *1/*1    | 2    | NM           | test     |
| A04        | male | 24          | 78          | 183         | caucasian | *1/*4    | 1    | IM           | test     |
| A05        | male | 27          | 69          | 176         | caucasian | *1/*4    | 1    | IM           | test     |
| A06        | male | 24          | 86          | 181         | caucasian | *1/*1    | 2    | NM           | test     |
| A07        | male | 27          | 74          | 173         | caucasian | *1/*4    | 1    | IM           | training |
| A08        | male | 23          | 71          | 180         | caucasian | *4/*4    | 0    | PM           | training |
| A09        | male | 27          | 90          | 190         | caucasian | *1/*2    | 2    | NM           | training |
| A10        | male | 38          | 80          | 185         | caucasian | *2/*4    | 1    | IM           | test     |
| A11        | male | 34          | 101         | 195         | caucasian | *1/*4    | 1    | IM           | test     |
| A12        | male | 34          | 65          | 174         | caucasian | *2/*2x2  | 3    | UM           | test     |
| A13        | male | 31          | 83          | 189         | caucasian | *1/*4    | 1    | IM           | training |
| A14        | male | 25          | 79          | 180         | caucasian | *1/*2    | 2    | NM           | test     |
| A15        | male | 23          | 69          | 175         | caucasian | *1x2/*2  | 3    | UM           | test     |
| A16        | male | 29          | 86          | 188         | caucasian | *1/*4    | 1    | IM           | test     |
| C01        | male | 25          | 80          | 178         | caucasian | *1/*1    | 2    | NM           | test     |
| C02        | male | 24          | 71          | 173         | caucasian | *1/*1    | 2    | NM           | training |
| C03        | male | 37          | 66          | 178         | caucasian | *1/*1    | 2    | NM           | training |
| C04        | male | 27          | 92          | 185         | caucasian | *2x2/*3  | 2    | NM           | test     |
| C05        | male | 21          | 79          | 190         | caucasian | -        | -    | -            | test     |
| C06        | male | 29          | 76          | 176         | caucasian | *1/*1x2  | 3    | UM           | training |
| C07        | male | 31          | 84          | 185         | caucasian | -        | -    | -            | test     |
| C08        | male | 26          | 83          | 182         | caucasian | *4/*41   | 0.5  | IM           | training |
| C09        | male | 25          | 77          | 184         | caucasian | -        | -    | -            | test     |
| C10        | male | 26          | 69          | 184         | caucasian | *2/*9    | 1.5  | NM           | training |
| C11        | male | 33          | 91          | 194         | caucasian | *1/*41   | 1.5  | NM           | test     |
| C12        | male | 43          | 71          | 177         | caucasian | *1/*41   | 1.5  | NM           | test     |
| C13        | male | 29          | 79          | 179         | caucasian | -        | -    | -            | test     |
| C14        | male | 30          | 89          | 187         | caucasian | *1/*41   | 1.5  | NM           | test     |
| C15        | male | 22          | 74          | 176         | caucasian | *1/*4    | 1    | IM           | training |
| C16        | male | 29          | 99          | 189         | caucasian | -        | -    | -            | test     |
| D01        | male | 44          | 60          | 171         | caucasian | *1/*2    | 2    | NM           | test     |
| D02        | male | 25          | 75          | 185         | caucasian | *2/*41   | 1.5  | NM           | training |
| D03        | male | 23          | 82          | 183         | caucasian | *1/*1    | 2    | NM           | training |
| D04        | male | 18          | 74          | 186         | caucasian | *2/*2    | 2    | NM           | test     |
| D05        | male | 46          | 69          | 178         | caucasian | -        | -    | -            | test     |
| D06        | male | 48          | 73          | 179         | caucasian | *2/*4    | 1    | IM           | test     |
| D07        | male | 30          | 69          | 173         | caucasian | *1/*2    | 2    | NM           | test     |
| D08        | male | 27          | 70          | 180         | caucasian | *2/*4    | 1    | IM           | training |
| D09        | male | 42          | 74          | 173         | caucasian | *2/*2    | 2    | NM           | test     |
| D10        | male | 26          | 73          | 184         | caucasian | *1/*41   | 1.5  | NM           | test     |

Studies A, C and D were performed in healthy subjects, whereas participants of study E were HIV-infected patients, which did not yet receive any antiretroviral treatment.

-: not given, AS: CYP2D6 activity score, CYP2D6: Cytochrome P450 2D6, IM: intermediate metabolizer, NM: normal metabolizer, p.: projected, PM: poor metabolizer, UM: ultrarapid metabolizer.

**Table S6.3.2:** Dextromethorphan cocktail study table [12] (*continued*)

| Subject ID | Sex    | Age [years] | Weight [kg] | Height [cm] | Ethnicity        | CYP2D6   |    |              | Dataset  |
|------------|--------|-------------|-------------|-------------|------------------|----------|----|--------------|----------|
|            |        |             |             |             |                  | genotype | AS | p. phenotype |          |
| D11        | male   | 26          | 70          | 175         | caucasian        | *2/*4    | 1  | IM           | training |
| D12        | male   | 27          | 73          | 190         | caucasian        | *2/*4x2  | 1  | IM           | test     |
| E01        | male   | 33          | 56          | 185         | caucasian        | *1/*4    | 1  | IM           | test     |
| E02        | male   | 51          | 106         | 170         | caucasian        | *1/*4    | 1  | IM           | test     |
| E03        | male   | 39          | 75          | 175         | caucasian        | *1/*4    | 1  | IM           | test     |
| E04        | male   | 48          | 73          | 173         | caucasian        | *1/*1    | 2  | NM           | training |
| E05        | male   | 33          | 85          | 190         | caucasian        | *1/*1    | 2  | NM           | test     |
| E06        | male   | 35          | 72          | 175         | caucasian        | *1/*3    | 1  | IM           | test     |
| E07        | female | 32          | 73          | 164         | african american | *1/*1    | 2  | NM           | test     |
| E08        | male   | 43          | 76          | 172         | african american | *1/*1    | 2  | NM           | test     |
| E09        | male   | 57          | 62          | 174         | caucasian        | *1/*1    | 2  | NM           | test     |
| E10        | male   | 30          | 49          | 171         | caucasian        | *1/*5    | 1  | IM           | training |
| E11        | male   | 41          | 86          | 184         | caucasian        | *1/*4    | 1  | IM           | test     |
| E12        | male   | 38          | 69          | 176         | caucasian        | *1/*1    | 2  | NM           | training |
| E13        | male   | 43          | 66          | 167         | african american | *1/*1    | 2  | NM           | test     |
| E14        | male   | 30          | 75          | 180         | caucasian        | *1/*4    | 1  | IM           | test     |
| E15        | female | 27          | 55          | 164         | caucasian        | *1/*1    | 2  | NM           | training |
| E16        | male   | 59          | 87          | 183         | caucasian        | *1/*4    | 1  | IM           | training |
| E17        | female | 28          | 50          | 167         | african american | *1/2x*4  | 1  | IM           | test     |
| E18        | female | 39          | 63          | 178         | caucasian        | *1/*1    | 2  | NM           | test     |
| E20        | male   | 34          | 73          | 176         | caucasian        | *1/*1    | 2  | NM           | training |
| E21        | female | 36          | 54          | 156         | african american | *1/*5    | 1  | IM           | training |
| E22        | male   | 42          | 94          | 169         | caucasian        | *4/*6    | 0  | PM           | test     |
| E23        | male   | 60          | 64          | 178         | caucasian        | *1x2/*1  | 3  | UM           | training |
| E24        | male   | 33          | 70          | 180         | caucasian        | *1/*1    | 2  | NM           | training |
| E25        | female | 60          | 73          | 180         | caucasian        | *1/*1    | 2  | NM           | training |
| E26        | male   | 25          | 83          | 166         | caucasian        | *1/*3    | 1  | IM           | training |
| E27        | male   | 40          | 70          | 176         | caucasian        | *1/*1    | 2  | NM           | test     |
| E28        | male   | 48          | 80          | 172         | caucasian        | *1/*4    | 1  | IM           | training |
| E30        | female | 38          | 67          | 173         | caucasian        | *1/*4    | 1  | IM           | test     |

Studies A, C and D were performed in healthy subjects, whereas participants of study E were HIV-infected patients, which did not yet receive any antiretroviral treatment.

-: not given, AS: CYP2D6 activity score, CYP2D6: Cytochrome P450 2D6, IM: intermediate metabolizer, NM: normal metabolizer, p.: projected, PM: poor metabolizer, UM: ultrarapid metabolizer.

## S6.4 Plasma Concentration-Time Profiles

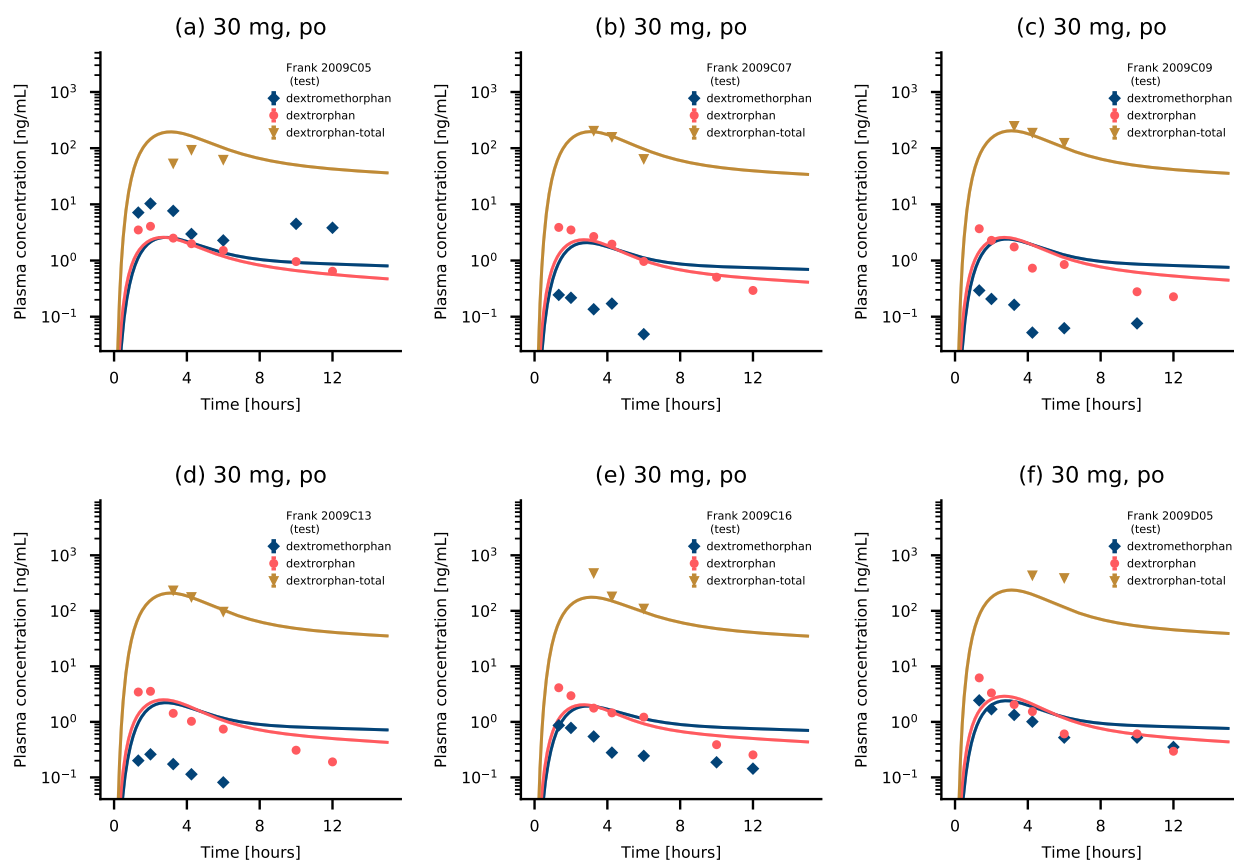

**Figure S6.4.2:** Dextromethorphan plasma concentrations for individuals where no genotype was provided. The simulations were performed using the model CYP2D6  $k_{cat}$  value for normal metabolizers (see Section S2.1). Predictions of dextromethorphan and dextrorphan profiles, compared to observed data [12] (semilogarithmic representation). Predictions using the population  $k_{cat}$  are shown as solid lines, individual predictions are shown as dotted lines. Symbols represent the corresponding observed data. po: oral.

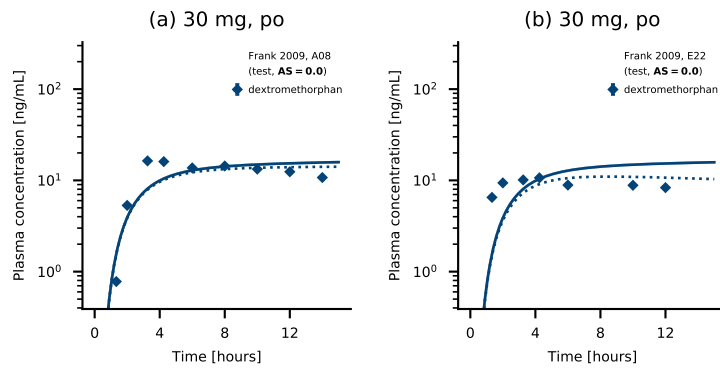

**Figure S6.4.3:** Dextromethorphan plasma concentrations for individuals with a CYP2D6 AS = 0 (poor metabolizer (PM)). Predictions of dextromethorphan plasma concentration-time profiles, compared to observed data [12] (semilogarithmic representation). Predictions using the population  $k_{\text{cat}}$  are shown as solid lines, individual predictions are shown as dotted lines. Symbols represent the corresponding observed data. AS: activity score, po: oral.

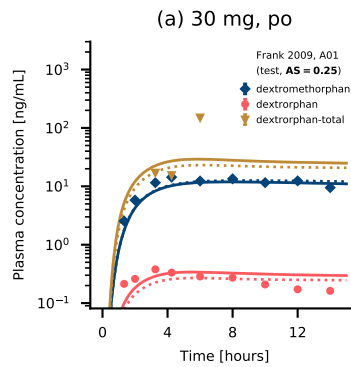

**Figure S6.4.4:** Dextromethorphan, dextrorphan and total dextrorphan plasma concentrations for individuals with a CYP2D6 AS = 0.25. Predictions of dextromethorphan plasma concentration-time profiles, compared to observed data [12] (semilogarithmic representation). Predictions using the population  $k_{\text{cat}}$  are shown as solid lines, individual predictions are shown as dotted lines. Symbols represent the corresponding observed data. AS: activity score, po: oral.

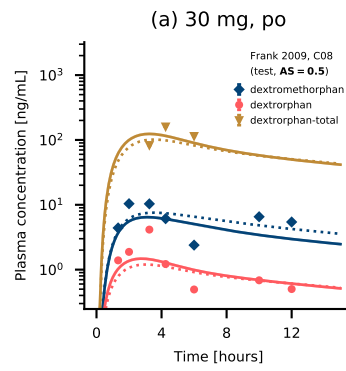

**Figure S6.4.5:** Dextromethorphan, dextrorphan and total dextrorphan plasma concentrations for individuals with a CYP2D6 AS = 0.5. Predictions of dextromethorphan plasma concentration-time profiles, compared to observed data [12] (semilogarithmic representation). Predictions using the population  $k_{cat}$  are shown as solid lines, individual predictions are shown as dotted lines. Symbols represent the corresponding observed data. AS: activity score, po: oral.

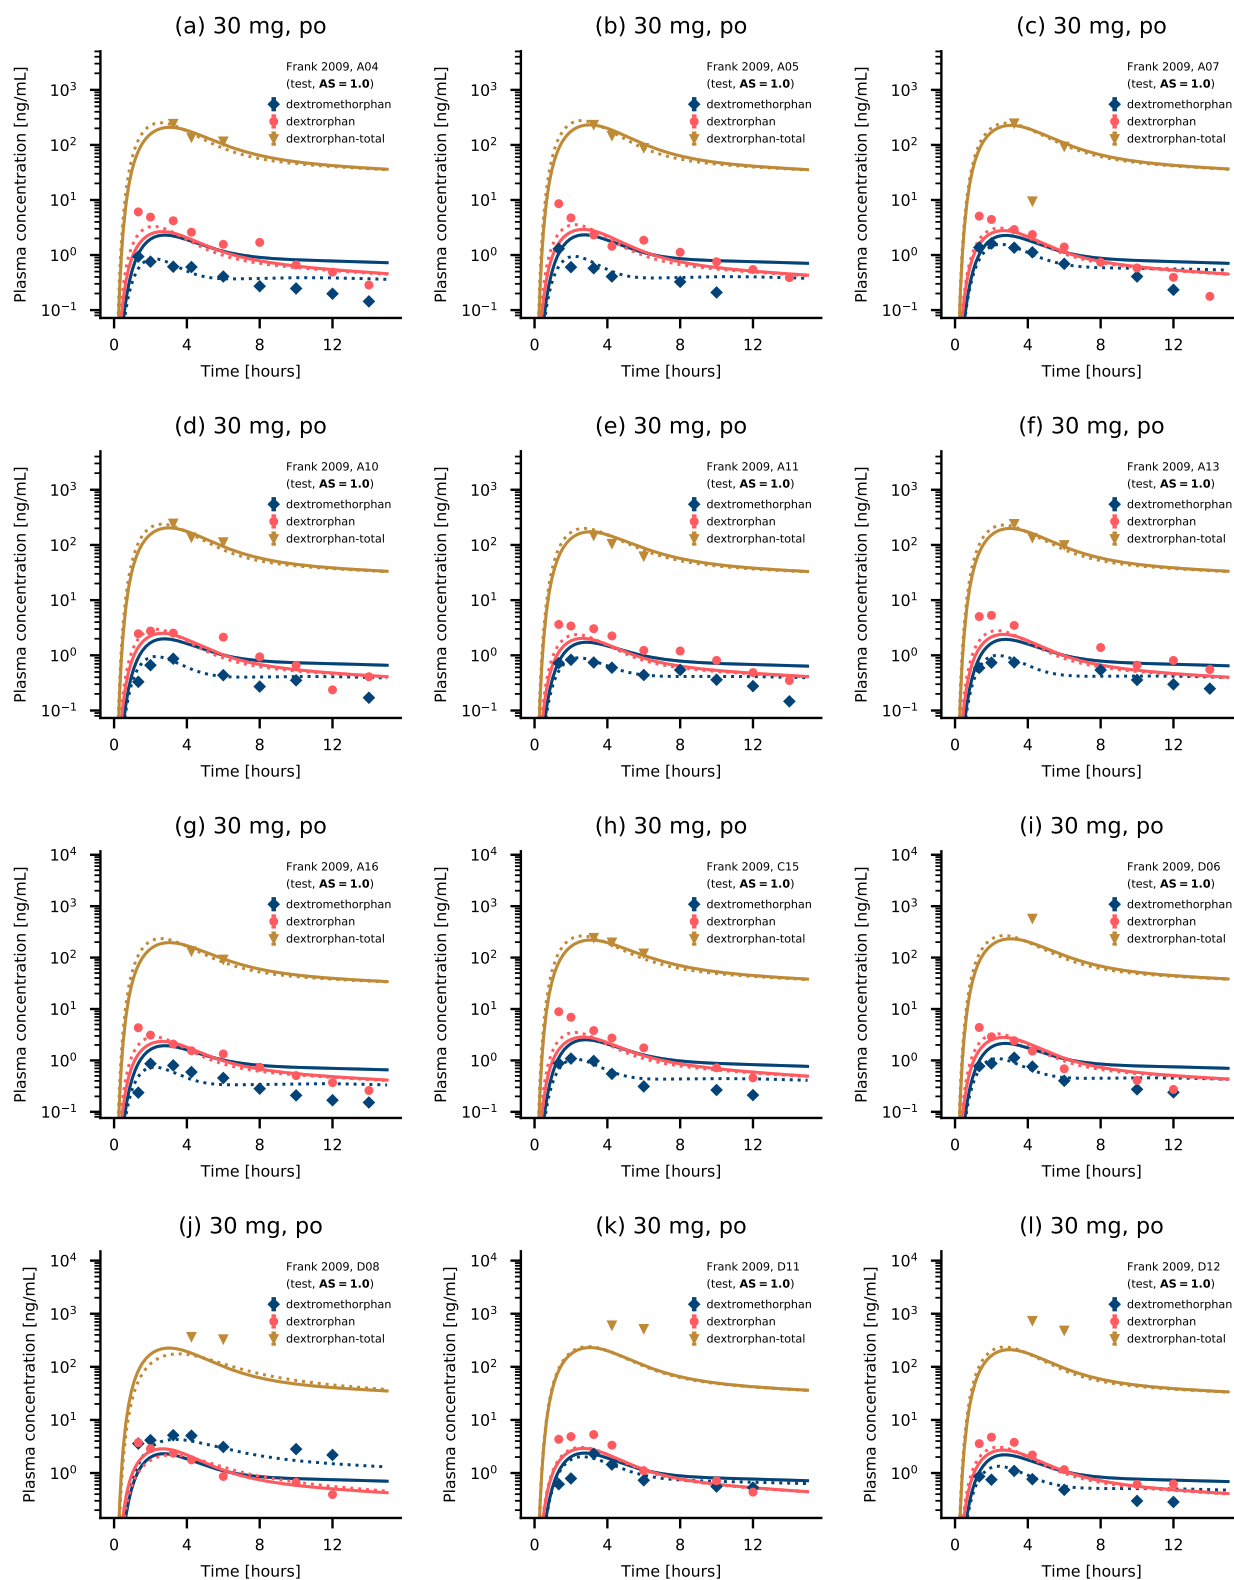

**Figure S6.4.6:** Dextromethorphan, dextrorphan and total dextrorphan plasma concentrations for individuals with a CYP2D6 AS = 1. Predictions of dextromethorphan plasma concentration-time profiles, compared to observed data [12] (semilogarithmic representation). Predictions using the population  $k_{cat}$  are shown as solid lines, individual predictions are shown as dotted lines. Symbols represent the corresponding observed data. AS: activity score, po: oral.



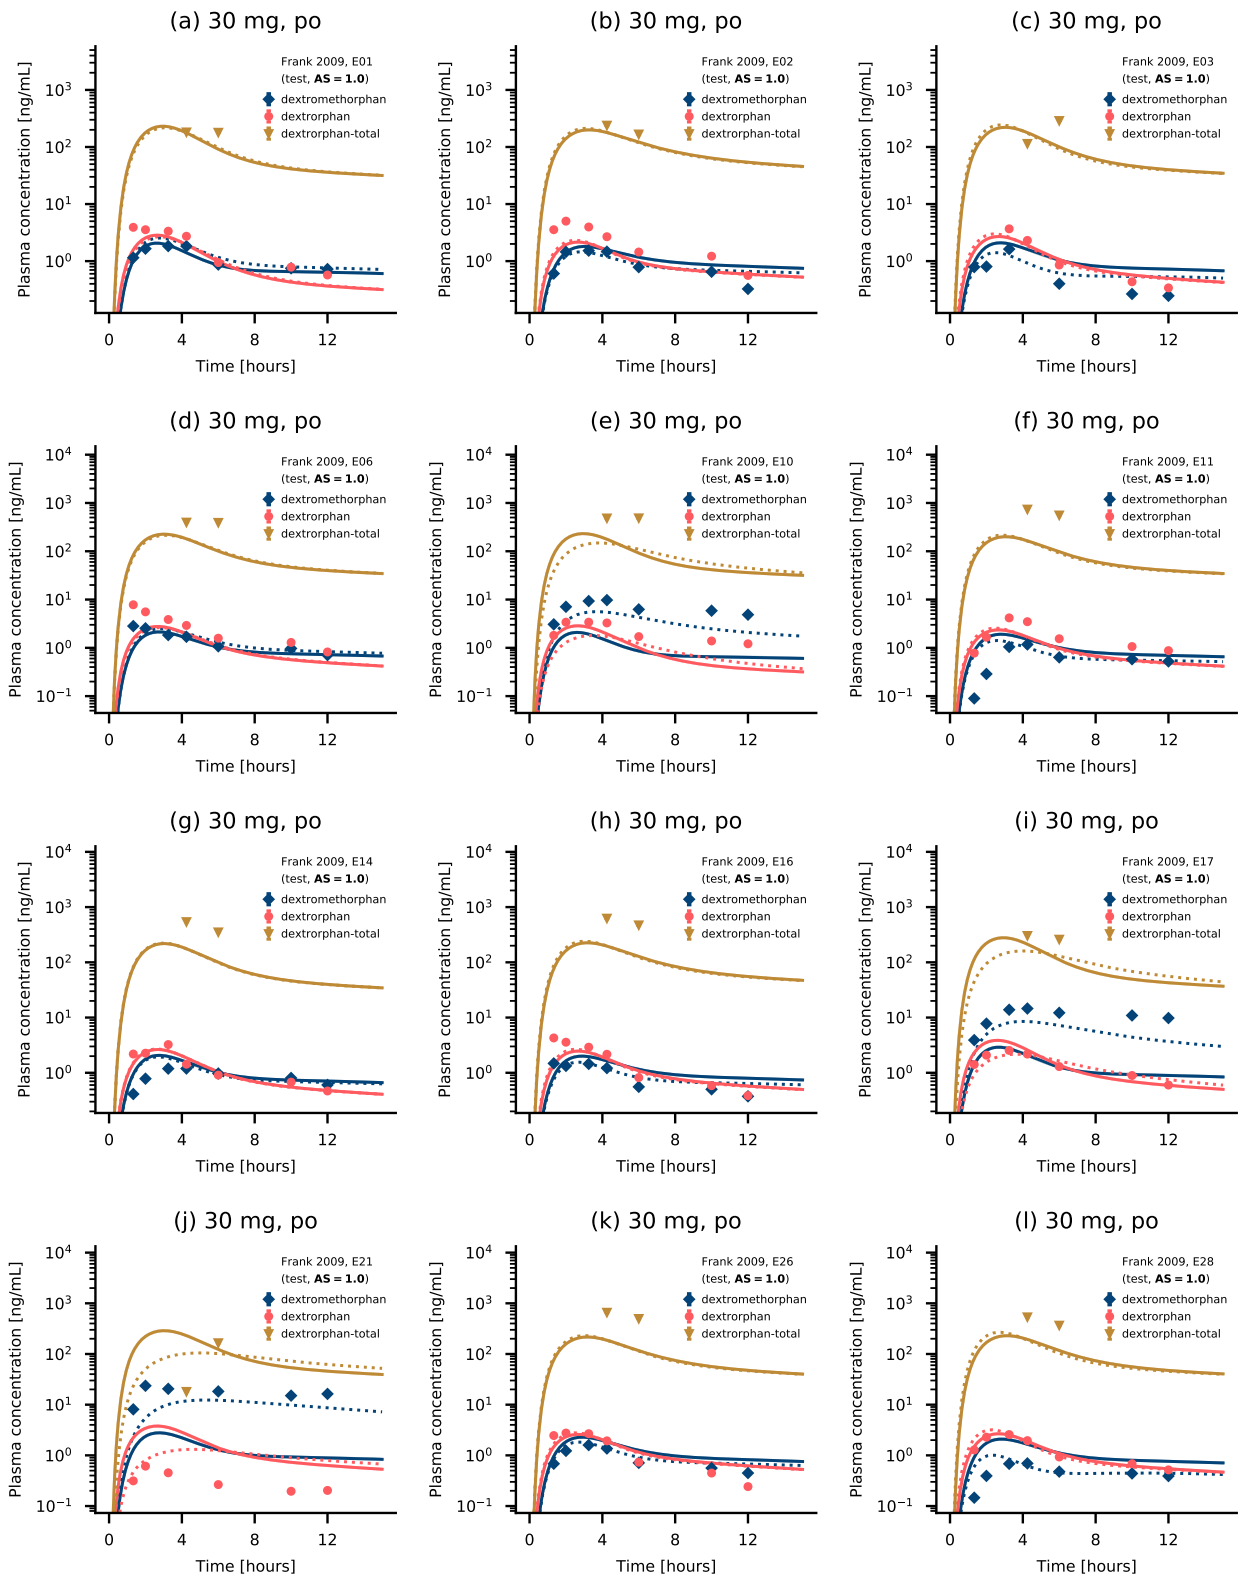

**Figure S6.4.7:** Dextromethorphan, dextrorphan and total dextrorphan plasma concentrations for individuals with a CYP2D6 AS = 1. Predictions of dextromethorphan plasma concentration-time profiles, compared to observed data [12] (semilogarithmic representation). Predictions using the population  $k_{cat}$  are shown as solid lines, individual predictions are shown as dotted lines. Symbols represent the corresponding observed data. AS: activity score, po: oral.

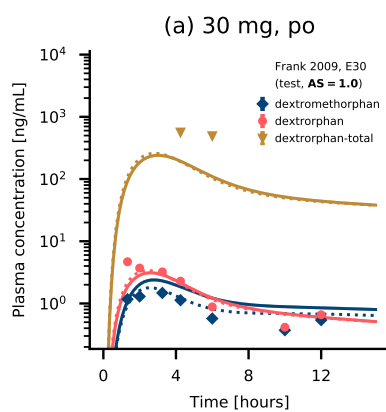

**Figure S6.4.8:** Dextromethorphan, dextrorphan and total dextrorphan plasma concentrations for individuals with a CYP2D6 AS = 1. Predictions of dextromethorphan plasma concentration-time profiles, compared to observed data [12] (semilogarithmic representation). Predictions using the population  $k_{cat}$  are shown as solid lines, individual predictions are shown as dotted lines. Symbols represent the corresponding observed data. AS: activity score, po: oral.

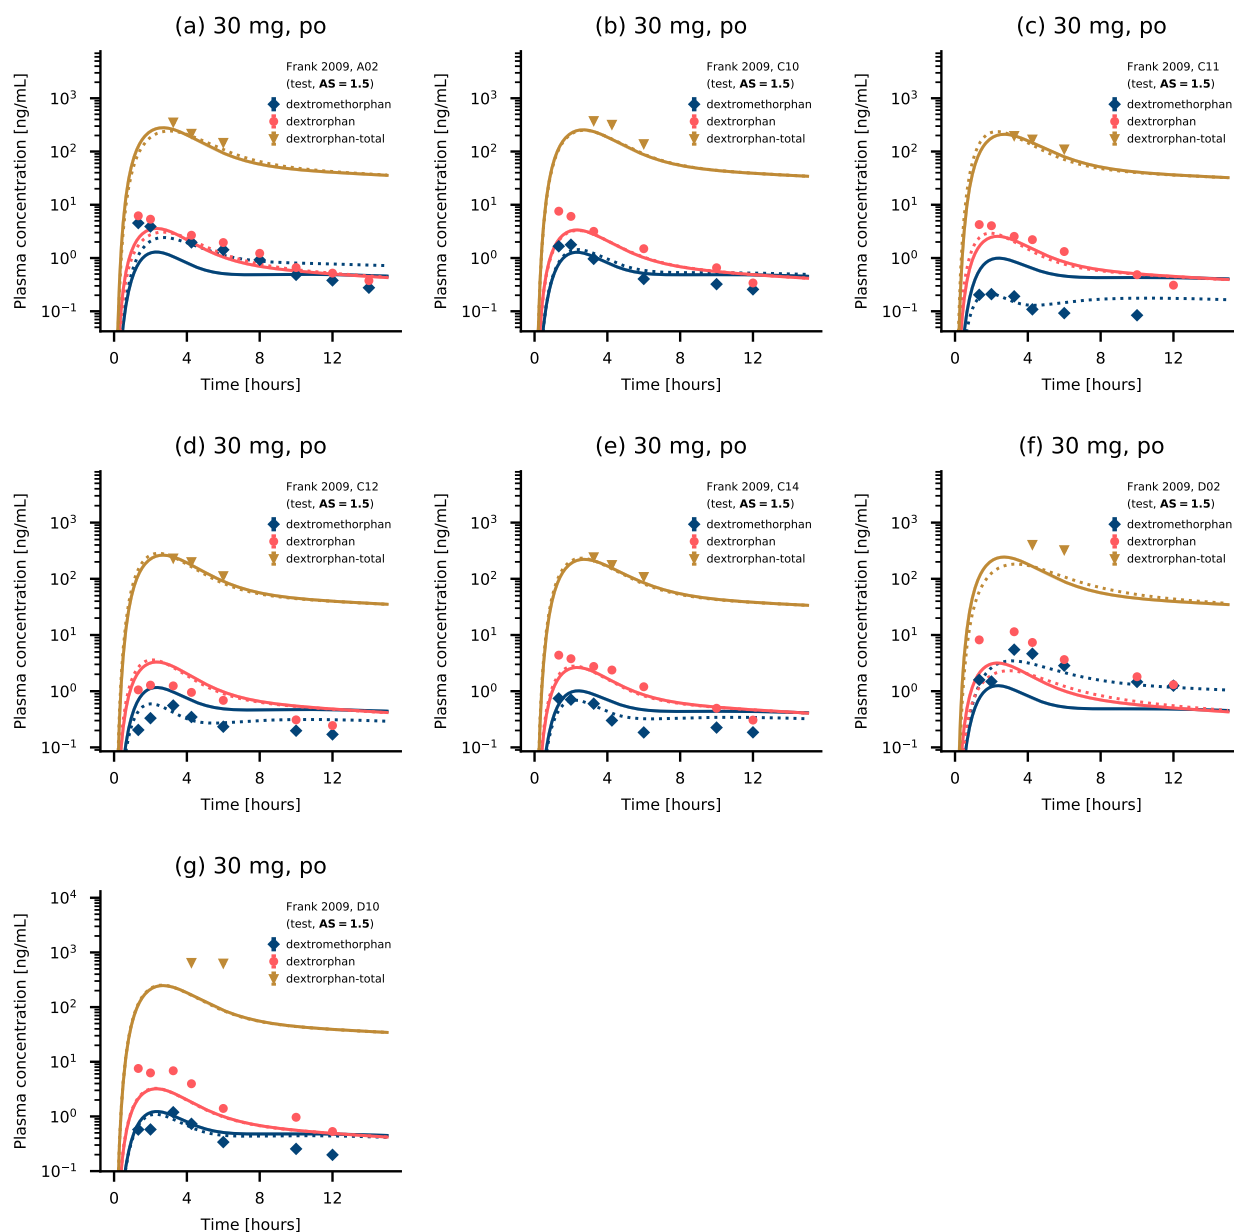

**Figure S6.4.9:** Dextromethorphan, dextrorphan and total dextrorphan plasma concentrations for individuals with a CYP2D6 AS = 1.5. Predictions of dextromethorphan plasma concentration-time profiles, compared to observed data [12] (semilogarithmic representation). Predictions using the population  $k_{cat}$  are shown as solid lines, individual predictions are shown as dotted lines. Symbols represent the corresponding observed data. AS: activity score, po: oral.

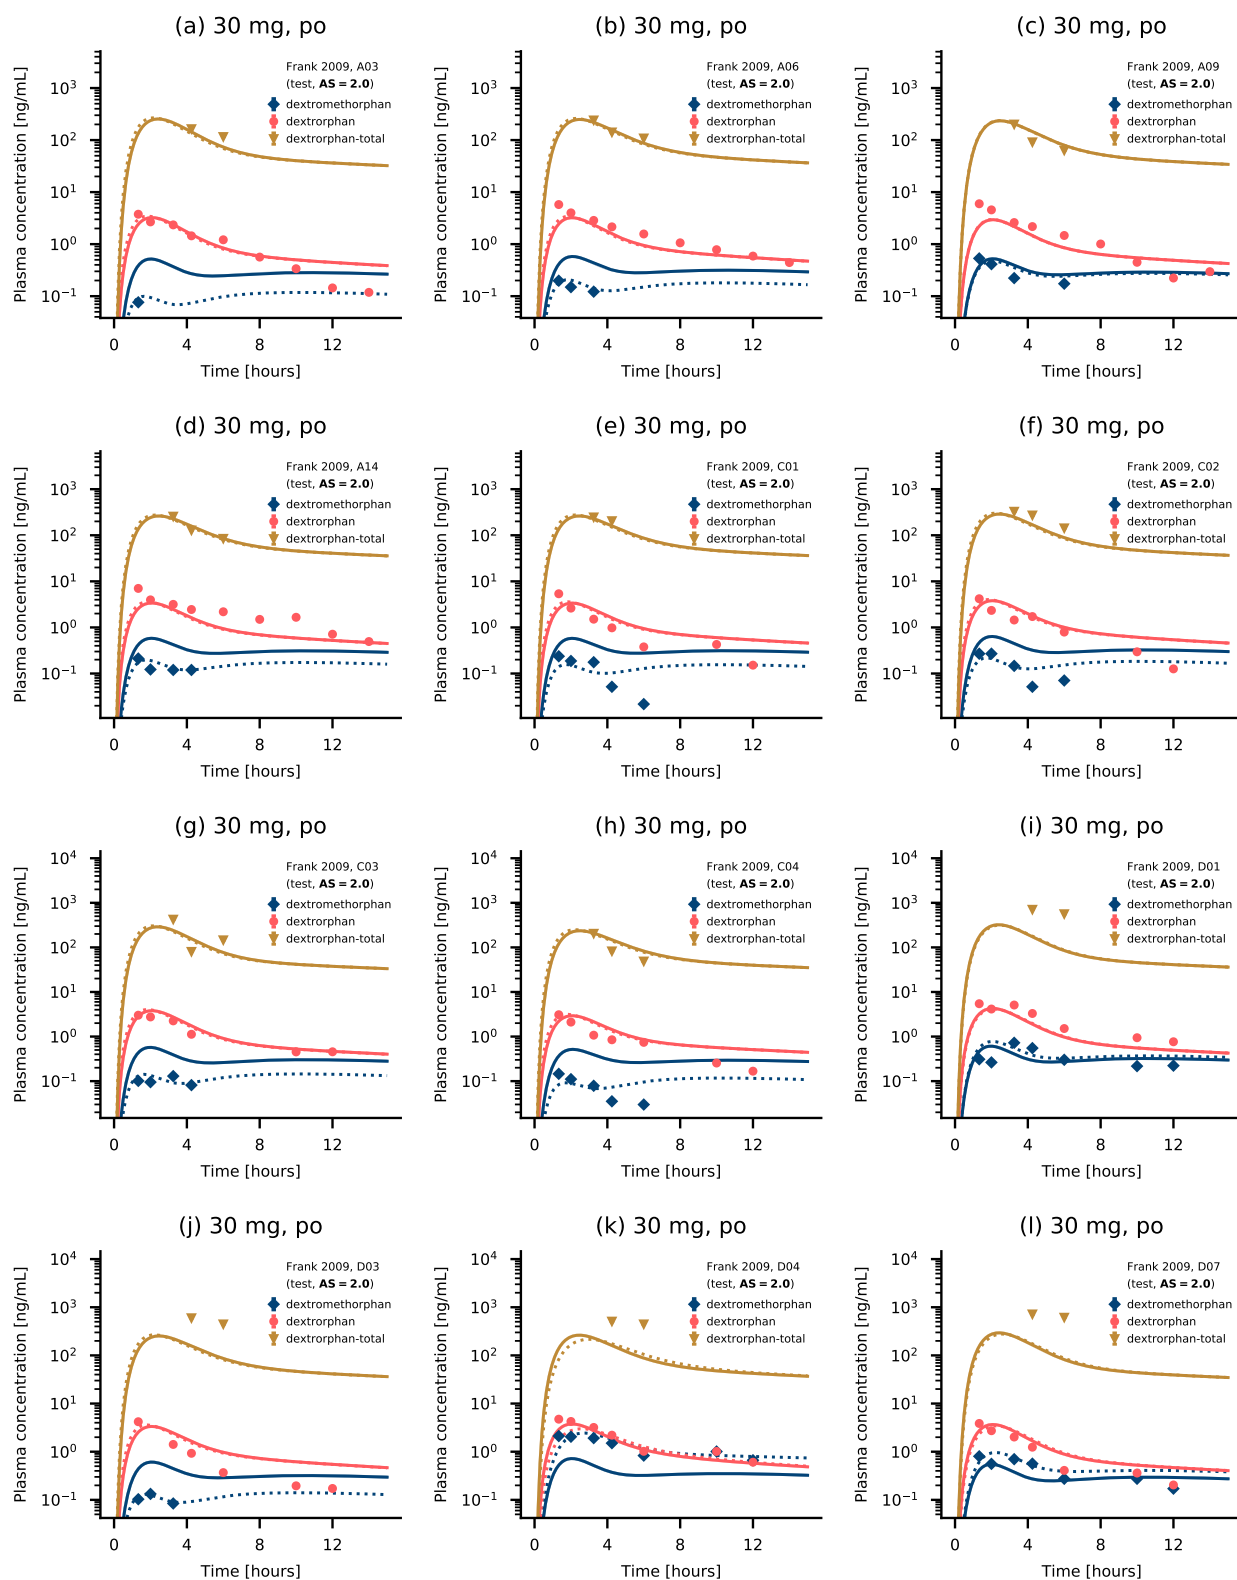

**Figure S6.4.10:** Dextromethorphan, dextrorphan and total dextrorphan plasma concentrations for individuals with a CYP2D6 AS = 2. Predictions of dextromethorphan plasma concentration-time profiles, compared to observed data [12] (semilogarithmic representation). Predictions using the population  $k_{cat}$  are shown as solid lines, individual predictions are shown as dotted lines. Symbols represent the corresponding observed data. AS: activity score, po: oral.

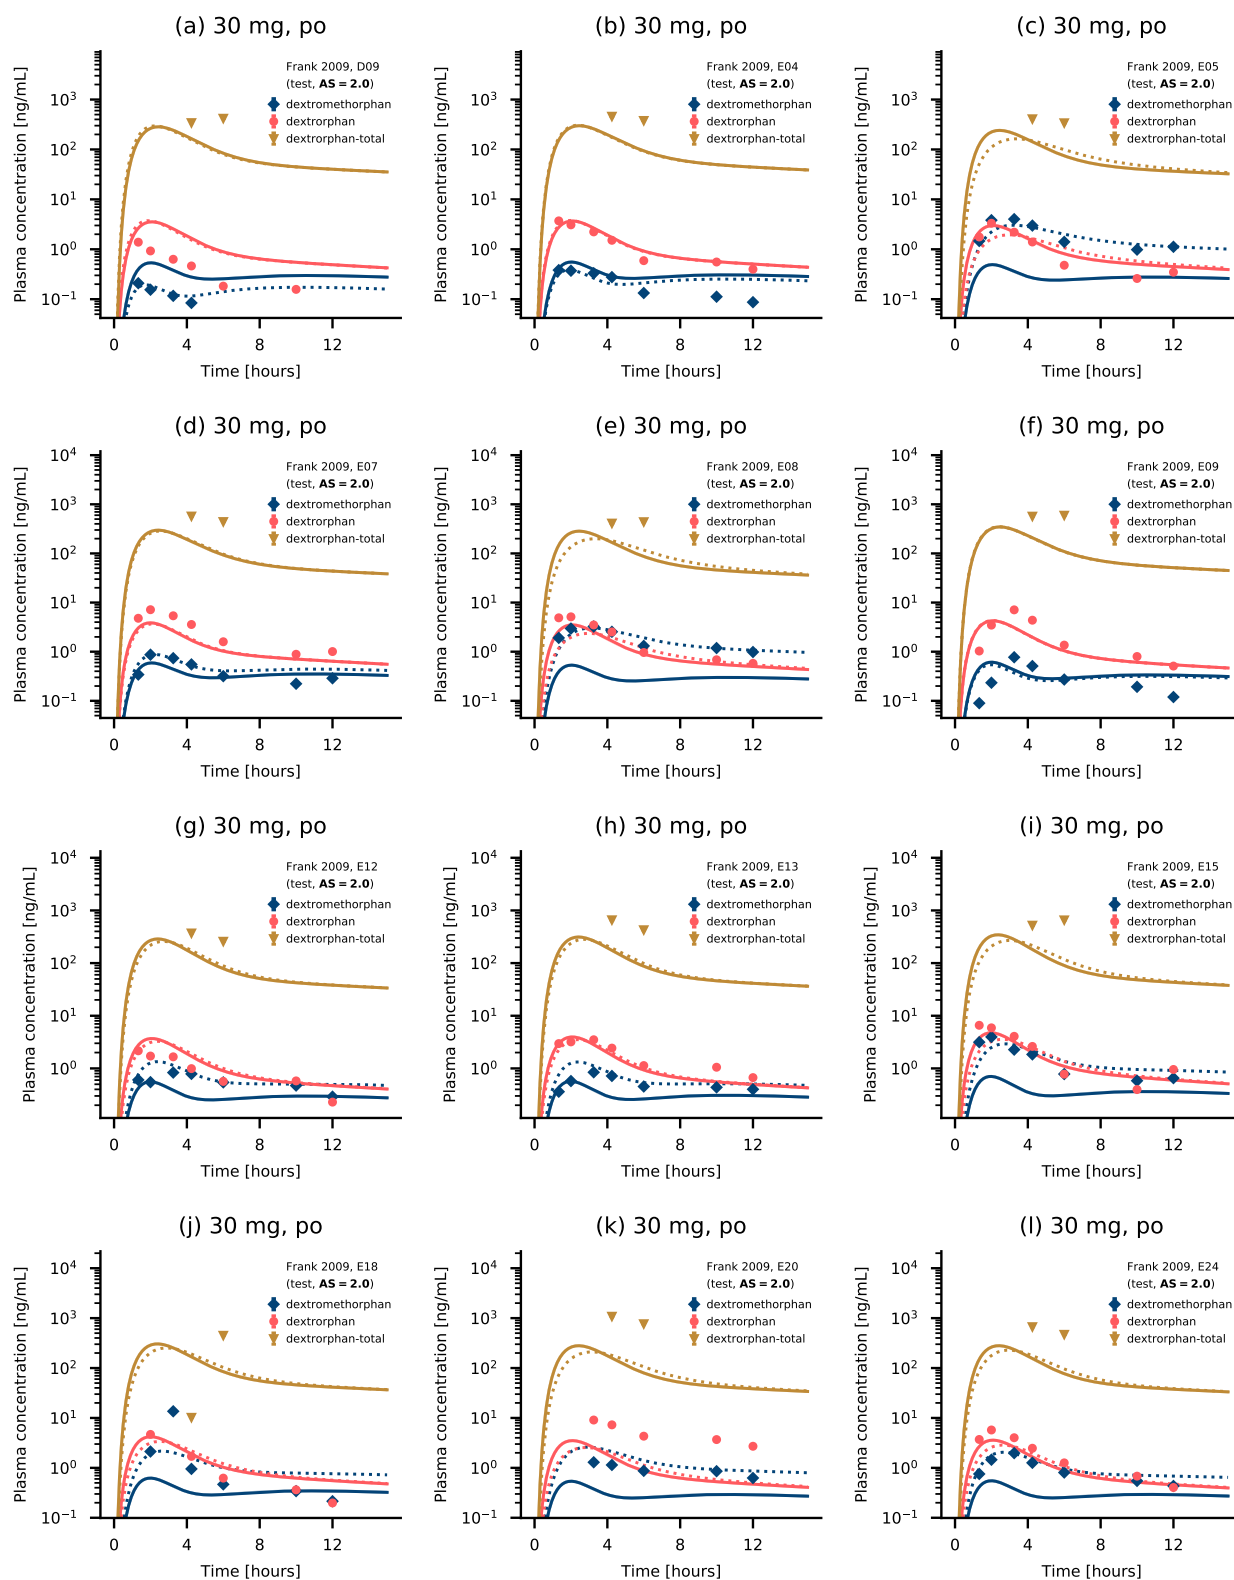

**Figure S6.4.11:** Dextromethorphan, dextrorphan and total dextrorphan plasma concentrations for individuals with a CYP2D6 AS = 2. Predictions of dextromethorphan plasma concentration-time profiles, compared to observed data [12] (semilogarithmic representation). Predictions using the population  $k_{cat}$  are shown as solid lines, individual predictions are shown as dotted lines. Symbols represent the corresponding observed data. AS: activity score, po: oral.

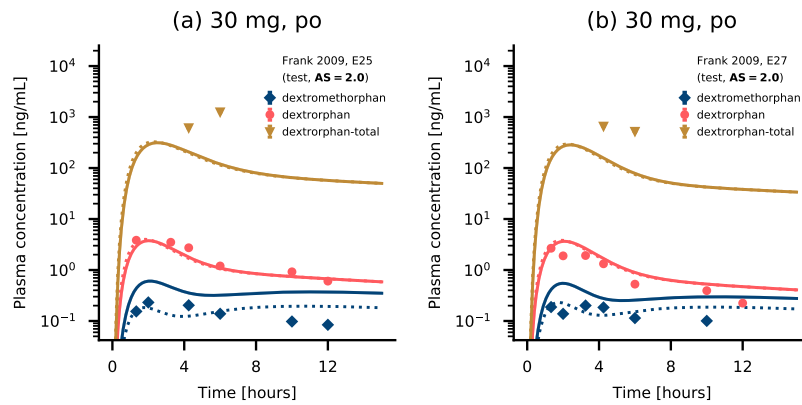

**Figure S6.4.12:** Dextromethorphan, dextrorphan and total dextrorphan plasma concentrations for individuals with a CYP2D6 AS = 2. Predictions of dextromethorphan plasma concentration-time profiles, compared to observed data [12] (semilogarithmic representation). Predictions using the population  $k_{cat}$  are shown as solid lines, individual predictions are shown as dotted lines. Symbols represent the corresponding observed data. AS: activity score, po: oral.

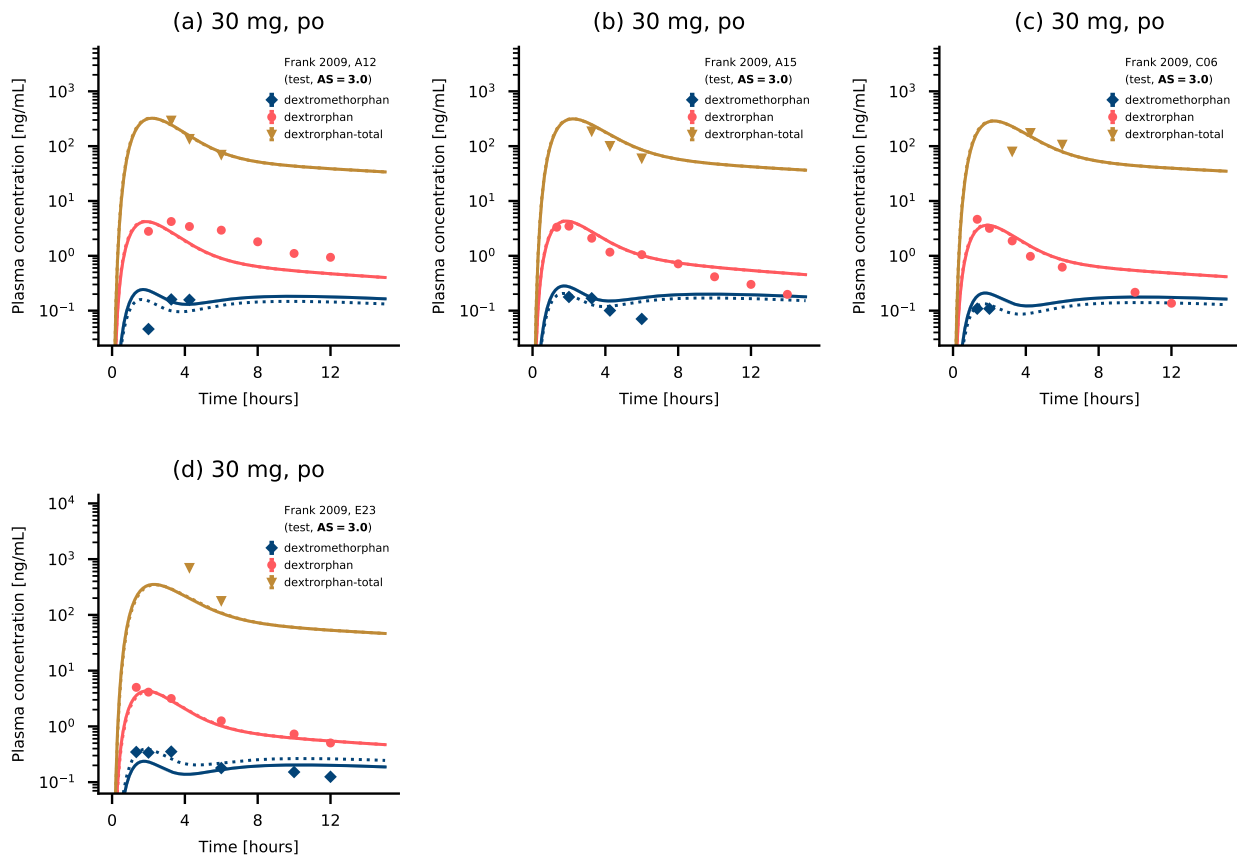

**Figure S6.4.13:** Dextromethorphan, dextrorphan and total dextrorphan plasma concentrations for individuals with a CYP2D6 AS = 3. Predictions of dextromethorphan plasma concentration-time profiles, compared to observed data [12] (semilogarithmic representation). Predictions using the population  $k_{cat}$  are shown as solid lines, individual predictions are shown as dotted lines. Symbols represent the corresponding observed data. AS: activity score, po: oral.

## S6.5 MRD of Plasma Concentration Predictions

**Table S6.5.3:** Mean relative deviation of plasma concentration predictions

| Dosing         | Molecule         | CYP2D6 status | MRD                  |                       | Subject ID |
|----------------|------------------|---------------|----------------------|-----------------------|------------|
|                |                  |               | population $k_{cat}$ | optim. ind. $k_{cat}$ |            |
| po, cap, 30 mg | dextromethorphan | AS=0.25       | 1.27                 | 1.26                  | A01        |
| po, cap, 30 mg | dextromethorphan | AS=1.5        | 2.59                 | 2.06                  | A02        |
| po, cap, 30 mg | dextromethorphan | AS=2.0        | 5.08                 | 1.21                  | A03        |
| po, cap, 30 mg | dextromethorphan | AS=1.0        | 3.22                 | 1.60                  | A04        |
| po, cap, 30 mg | dextromethorphan | AS=1.0        | 3.19                 | 1.59                  | A05        |
| po, cap, 30 mg | dextromethorphan | AS=2.0        | 2.70                 | 1.20                  | A06        |
| po, cap, 30 mg | dextromethorphan | AS=1.0        | 1.77                 | 1.47                  | A07        |
| po, cap, 30 mg | dextromethorphan | AS=0.0        | 1.50                 | 1.49                  | A08        |
| po, cap, 30 mg | dextromethorphan | AS=2.0        | 1.50                 | 1.43                  | A09        |
| po, cap, 30 mg | dextromethorphan | AS=1.0        | 2.68                 | 1.55                  | A10        |
| po, cap, 30 mg | dextromethorphan | AS=1.0        | 2.26                 | 1.48                  | A11        |
| po, cap, 30 mg | dextromethorphan | AS=3.0        | 2.26                 | 1.97                  | A12        |
| po, cap, 30 mg | dextromethorphan | AS=1.0        | 2.12                 | 1.32                  | A13        |
| po, cap, 30 mg | dextromethorphan | AS=2.0        | 3.19                 | 1.29                  | A14        |
| po, cap, 30 mg | dextromethorphan | AS=3.0        | 1.61                 | 1.43                  | A15        |
| po, cap, 30 mg | dextromethorphan | AS=1.0        | 3.06                 | 1.67                  | A16        |
| po, cap, 30 mg | dextromethorphan | AS=2.0        | 4.73                 | 2.51                  | C01        |
| po, cap, 30 mg | dextromethorphan | AS=2.0        | 3.43                 | 1.76                  | C02        |
| po, cap, 30 mg | dextromethorphan | AS=2.0        | 4.14                 | 1.33                  | C03        |
| po, cap, 30 mg | dextromethorphan | AS=2.0        | 5.65                 | 1.97                  | C04        |
| po, cap, 30 mg | dextromethorphan | -             | 3.75                 | 3.75                  | C05        |
| po, cap, 30 mg | dextromethorphan | AS=3.0        | 1.79                 | 1.15                  | C06        |
| po, cap, 30 mg | dextromethorphan | -             | 10.79                | 10.79                 | C07        |
| po, cap, 30 mg | dextromethorphan | AS=0.5        | 1.70                 | 1.61                  | C08        |
| po, cap, 30 mg | dextromethorphan | -             | 14.00                | 14.00                 | C09        |
| po, cap, 30 mg | dextromethorphan | AS=1.5        | 1.61                 | 1.65                  | C10        |
| po, cap, 30 mg | dextromethorphan | AS=1.5        | 4.60                 | 1.46                  | C11        |
| po, cap, 30 mg | dextromethorphan | AS=1.5        | 2.53                 | 1.62                  | C12        |
| po, cap, 30 mg | dextromethorphan | -             | 10.29                | 10.29                 | C13        |
| po, cap, 30 mg | dextromethorphan | AS=1.5        | 1.91                 | 1.51                  | C14        |
| po, cap, 30 mg | dextromethorphan | AS=1.0        | 2.96                 | 1.46                  | C15        |
| po, cap, 30 mg | dextromethorphan | -             | 3.78                 | 3.78                  | C16        |
| po, cap, 30 mg | dextromethorphan | AS=2.0        | 1.68                 | 1.77                  | D01        |
| po, cap, 30 mg | dextromethorphan | AS=1.5        | 3.64                 | 1.42                  | D02        |
| po, cap, 30 mg | dextromethorphan | AS=2.0        | 4.70                 | 1.10                  | D03        |
| po, cap, 30 mg | dextromethorphan | AS=2.0        | 3.13                 | 1.35                  | D04        |
| po, cap, 30 mg | dextromethorphan | -             | 1.94                 | 1.94                  | D05        |
| po, cap, 30 mg | dextromethorphan | AS=1.0        | 2.31                 | 1.41                  | D06        |
| po, cap, 30 mg | dextromethorphan | AS=2.0        | 1.63                 | 1.56                  | D07        |
| po, cap, 30 mg | dextromethorphan | AS=1.0        | 2.86                 | 1.57                  | D08        |
| po, cap, 30 mg | dextromethorphan | AS=2.0        | 2.97                 | 1.24                  | D09        |
| po, cap, 30 mg | dextromethorphan | AS=1.5        | 1.69                 | 1.60                  | D10        |
| po, cap, 30 mg | dextromethorphan | AS=1.0        | 1.64                 | 1.49                  | D11        |
| po, cap, 30 mg | dextromethorphan | AS=1.0        | 2.20                 | 1.44                  | D12        |
| po, cap, 30 mg | dextromethorphan | AS=1.0        | 1.15                 | 1.20                  | E01        |
| po, cap, 30 mg | dextromethorphan | AS=1.0        | 1.49                 | 1.34                  | E02        |
| po, cap, 30 mg | dextromethorphan | AS=1.0        | 2.23                 | 1.67                  | E03        |
| po, cap, 30 mg | dextromethorphan | AS=2.0        | 1.98                 | 1.75                  | E04        |

-: not given, AS: CYP2D6 activity score, cap: capsule, CYP2D6: Cytochrome P450 2D6, ind.: individual, optim.: optimized, po: oral.

**Table S6.5.3:** Mean relative deviation of plasma concentration predictions (continued)

| Dosing                 | Molecule         | CYP2D6 status | MRD                        |                                              | Subject ID |
|------------------------|------------------|---------------|----------------------------|----------------------------------------------|------------|
|                        |                  |               | population $k_{cat}$       | optim. ind. $k_{cat}$                        |            |
| po, cap, 30 mg         | dextromethorphan | AS=2.0        | 6.49                       | 1.35                                         | E05        |
| po, cap, 30 mg         | dextromethorphan | AS=1.0        | 1.54                       | 1.51                                         | E06        |
| po, cap, 30 mg         | dextromethorphan | AS=2.0        | 1.46                       | 1.45                                         | E07        |
| po, cap, 30 mg         | dextromethorphan | AS=2.0        | 5.64                       | 1.30                                         | E08        |
| po, cap, 30 mg         | dextromethorphan | AS=2.0        | 2.44                       | 2.37                                         | E09        |
| po, cap, 30 mg         | dextromethorphan | AS=1.0        | 5.90                       | 1.94                                         | E10        |
| po, cap, 30 mg         | dextromethorphan | AS=1.0        | 3.07                       | 2.65                                         | E11        |
| po, cap, 30 mg         | dextromethorphan | AS=2.0        | 1.84                       | 1.51                                         | E12        |
| po, cap, 30 mg         | dextromethorphan | AS=2.0        | 1.71                       | 1.56                                         | E13        |
| po, cap, 30 mg         | dextromethorphan | AS=1.0        | 1.64                       | 1.58                                         | E14        |
| po, cap, 30 mg         | dextromethorphan | AS=2.0        | 3.91                       | 1.63                                         | E15        |
| po, cap, 30 mg         | dextromethorphan | AS=1.0        | 1.68                       | 1.45                                         | E16        |
| po, cap, 30 mg         | dextromethorphan | AS=1.0        | 6.78                       | 1.95                                         | E17        |
| po, cap, 30 mg         | dextromethorphan | AS=2.0        | 4.89                       | 2.89                                         | E18        |
| po, cap, 30 mg         | dextromethorphan | AS=2.0        | 3.23                       | 1.63                                         | E20        |
| po, cap, 30 mg         | dextromethorphan | AS=1.0        | 11.61                      | 2.48                                         | E21        |
| po, cap, 30 mg         | dextromethorphan | AS=0.0        | 2.06                       | 2.00                                         | E22        |
| po, cap, 30 mg         | dextromethorphan | AS=3.0        | 1.63                       | 1.51                                         | E23        |
| po, cap, 30 mg         | dextromethorphan | AS=2.0        | 2.96                       | 1.29                                         | E24        |
| po, cap, 30 mg         | dextromethorphan | AS=2.0        | 2.94                       | 1.65                                         | E25        |
| po, cap, 30 mg         | dextromethorphan | AS=1.0        | 1.56                       | 1.27                                         | E26        |
| po, cap, 30 mg         | dextromethorphan | AS=2.0        | 2.31                       | 1.45                                         | E27        |
| po, cap, 30 mg         | dextromethorphan | AS=1.0        | 3.12                       | 1.90                                         | E28        |
| po, cap, 30 mg         | dextromethorphan | AS=1.0        | 1.75                       | 1.36                                         | E30        |
| MRD (dextromethorphan) |                  |               | 3.29 (1.15–14.00)<br>26/72 | 2.09 (1.10–14.00)<br>61/72 with MRD $\leq 2$ |            |
| po, cap, 30 mg         | dextrorphan      | AS=0.25       | 1.54                       | 1.62                                         | A01        |
| po, cap, 30 mg         | dextrorphan      | AS=1.5        | 1.65                       | 1.78                                         | A02        |
| po, cap, 30 mg         | dextrorphan      | AS=2.0        | 1.83                       | 1.81                                         | A03        |
| po, cap, 30 mg         | dextrorphan      | AS=1.0        | 1.91                       | 1.73                                         | A04        |
| po, cap, 30 mg         | dextrorphan      | AS=1.0        | 1.90                       | 1.70                                         | A05        |
| po, cap, 30 mg         | dextrorphan      | AS=2.0        | 1.48                       | 1.44                                         | A06        |
| po, cap, 30 mg         | dextrorphan      | AS=1.0        | 1.76                       | 1.66                                         | A07        |
| po, cap, 30 mg         | dextrorphan      | AS=2.0        | 1.73                       | 1.72                                         | A09        |
| po, cap, 30 mg         | dextrorphan      | AS=1.0        | 1.55                       | 1.54                                         | A10        |
| po, cap, 30 mg         | dextrorphan      | AS=1.0        | 1.76                       | 1.64                                         | A11        |
| po, cap, 30 mg         | dextrorphan      | AS=3.0        | 2.09                       | 2.10                                         | A12        |
| po, cap, 30 mg         | dextrorphan      | AS=1.0        | 2.07                       | 1.88                                         | A13        |
| po, cap, 30 mg         | dextrorphan      | AS=2.0        | 1.91                       | 1.88                                         | A14        |
| po, cap, 30 mg         | dextrorphan      | AS=3.0        | 1.52                       | 1.52                                         | A15        |
| po, cap, 30 mg         | dextrorphan      | AS=1.0        | 1.61                       | 1.43                                         | A16        |
| po, cap, 30 mg         | dextrorphan      | AS=2.0        | 2.05                       | 1.97                                         | C01        |
| po, cap, 30 mg         | dextrorphan      | AS=2.0        | 2.02                       | 1.99                                         | C02        |
| po, cap, 30 mg         | dextrorphan      | AS=2.0        | 1.28                       | 1.26                                         | C03        |
| po, cap, 30 mg         | dextrorphan      | AS=2.0        | 1.90                       | 1.85                                         | C04        |
| po, cap, 30 mg         | dextrorphan      | -             | 1.54                       | 1.54                                         | C05        |
| po, cap, 30 mg         | dextrorphan      | AS=3.0        | 1.92                       | 1.90                                         | C06        |

-: not given, AS: CYP2D6 activity score, cap: capsule, CYP2D6: Cytochrome P450 2D6, ind.: individual, optim.: optimized, po: oral.



**Table S6.5.3:** Mean relative deviation of plasma concentration predictions (continued)

| Dosing         | Molecule    | CYP2D6 status | MRD                  |                       | Subject ID |
|----------------|-------------|---------------|----------------------|-----------------------|------------|
|                |             |               | population $k_{cat}$ | optim. ind. $k_{cat}$ |            |
| po, cap, 30 mg | dextrorphan | -             | 1.66                 | 1.66                  | C07        |
| po, cap, 30 mg | dextrorphan | AS=0.5        | 1.67                 | 1.84                  | C08        |
| po, cap, 30 mg | dextrorphan | -             | 2.00                 | 2.00                  | C09        |
| po, cap, 30 mg | dextrorphan | AS=1.5        | 1.84                 | 1.87                  | C10        |
| po, cap, 30 mg | dextrorphan | AS=1.5        | 1.63                 | 1.51                  | C11        |
| po, cap, 30 mg | dextrorphan | AS=1.5        | 1.99                 | 2.06                  | C12        |
| po, cap, 30 mg | dextrorphan | -             | 1.95                 | 1.95                  | C13        |
| po, cap, 30 mg | dextrorphan | AS=1.5        | 1.61                 | 1.55                  | C14        |
| po, cap, 30 mg | dextrorphan | AS=1.0        | 2.18                 | 1.86                  | C15        |
| po, cap, 30 mg | dextrorphan | -             | 1.84                 | 1.84                  | C16        |
| po, cap, 30 mg | dextrorphan | AS=2.0        | 1.59                 | 1.59                  | D01        |
| po, cap, 30 mg | dextrorphan | AS=1.5        | 3.60                 | 3.91                  | D02        |
| po, cap, 30 mg | dextrorphan | AS=2.0        | 2.37                 | 2.27                  | D03        |
| po, cap, 30 mg | dextrorphan | AS=2.0        | 1.31                 | 1.55                  | D04        |
| po, cap, 30 mg | dextrorphan | -             | 1.89                 | 1.89                  | D05        |
| po, cap, 30 mg | dextrorphan | AS=1.0        | 1.68                 | 1.49                  | D06        |
| po, cap, 30 mg | dextrorphan | AS=2.0        | 1.66                 | 1.72                  | D07        |
| po, cap, 30 mg | dextrorphan | AS=1.0        | 1.43                 | 1.76                  | D08        |
| po, cap, 30 mg | dextrorphan | AS=2.0        | 3.27                 | 3.26                  | D09        |
| po, cap, 30 mg | dextrorphan | AS=1.5        | 2.14                 | 2.11                  | D10        |
| po, cap, 30 mg | dextrorphan | AS=1.0        | 1.72                 | 1.66                  | D11        |
| po, cap, 30 mg | dextrorphan | AS=1.0        | 1.57                 | 1.43                  | D12        |
| po, cap, 30 mg | dextrorphan | AS=1.0        | 1.63                 | 1.69                  | E01        |
| po, cap, 30 mg | dextrorphan | AS=1.0        | 2.00                 | 1.91                  | E02        |
| po, cap, 30 mg | dextrorphan | AS=1.0        | 1.35                 | 1.32                  | E03        |
| po, cap, 30 mg | dextrorphan | AS=2.0        | 1.27                 | 1.25                  | E04        |
| po, cap, 30 mg | dextrorphan | AS=2.0        | 1.41                 | 1.79                  | E05        |
| po, cap, 30 mg | dextrorphan | AS=1.0        | 2.27                 | 2.35                  | E06        |
| po, cap, 30 mg | dextrorphan | AS=2.0        | 1.73                 | 1.74                  | E07        |
| po, cap, 30 mg | dextrorphan | AS=2.0        | 1.43                 | 1.97                  | E08        |
| po, cap, 30 mg | dextrorphan | AS=2.0        | 1.88                 | 1.90                  | E09        |
| po, cap, 30 mg | dextrorphan | AS=1.0        | 2.03                 | 2.19                  | E10        |
| po, cap, 30 mg | dextrorphan | AS=1.0        | 1.77                 | 1.85                  | E11        |
| po, cap, 30 mg | dextrorphan | AS=2.0        | 1.68                 | 1.69                  | E12        |
| po, cap, 30 mg | dextrorphan | AS=2.0        | 1.38                 | 1.35                  | E13        |
| po, cap, 30 mg | dextrorphan | AS=1.0        | 1.26                 | 1.24                  | E14        |
| po, cap, 30 mg | dextrorphan | AS=2.0        | 1.49                 | 1.83                  | E15        |
| po, cap, 30 mg | dextrorphan | AS=1.0        | 1.67                 | 1.57                  | E16        |
| po, cap, 30 mg | dextrorphan | AS=1.0        | 1.38                 | 1.27                  | E17        |
| po, cap, 30 mg | dextrorphan | AS=2.0        | 1.76                 | 1.92                  | E18        |
| po, cap, 30 mg | dextrorphan | AS=2.0        | 5.10                 | 4.55                  | E20        |
| po, cap, 30 mg | dextrorphan | AS=1.0        | 5.33                 | 3.11                  | E21        |
| po, cap, 30 mg | dextrorphan | AS=3.0        | 1.20                 | 1.22                  | E23        |
| po, cap, 30 mg | dextrorphan | AS=2.0        | 1.43                 | 1.62                  | E24        |
| po, cap, 30 mg | dextrorphan | AS=2.0        | 1.29                 | 1.30                  | E25        |
| po, cap, 30 mg | dextrorphan | AS=1.0        | 1.61                 | 1.56                  | E26        |
| po, cap, 30 mg | dextrorphan | AS=2.0        | 1.59                 | 1.59                  | E27        |
| po, cap, 30 mg | dextrorphan | AS=1.0        | 1.10                 | 1.27                  | E28        |
| po, cap, 30 mg | dextrorphan | AS=1.0        | 1.55                 | 1.45                  | E30        |

-: not given, AS: CYP2D6 activity score, cap: capsule, CYP2D6: Cytochrome P450 2D6, ind.: individual, optim.: optimized, po: oral.

**Table S6.5.3:** Mean relative deviation of plasma concentration predictions (continued)

| Dosing            | Molecule          | CYP2D6 status | MRD                       |                                             | Subject ID |
|-------------------|-------------------|---------------|---------------------------|---------------------------------------------|------------|
|                   |                   |               | population $k_{cat}$      | optim. ind. $k_{cat}$                       |            |
| MRD (dextrorphan) |                   |               | 1.85 (1.10–5.33)<br>57/72 | 1.82 (1.22–4.55)<br>60/70 with MRD $\leq 2$ |            |
| po, cap, 30 mg    | dextrorphan-total | AS=0.25       | 2.75                      | 2.99                                        | A01        |
| po, cap, 30 mg    | dextrorphan-total | AS=1.5        | 1.40                      | 1.35                                        | A02        |
| po, cap, 30 mg    | dextrorphan-total | AS=2.0        | 1.41                      | 1.50                                        | A03        |
| po, cap, 30 mg    | dextrorphan-total | AS=1.0        | 1.20                      | 1.22                                        | A04        |
| po, cap, 30 mg    | dextrorphan-total | AS=1.0        | 1.17                      | 1.09                                        | A05        |
| po, cap, 30 mg    | dextrorphan-total | AS=2.0        | 1.17                      | 1.20                                        | A06        |
| po, cap, 30 mg    | dextrorphan-total | AS=1.0        | 5.56                      | 5.48                                        | A07        |
| po, cap, 30 mg    | dextrorphan-total | AS=2.0        | 1.33                      | 1.33                                        | A09        |
| po, cap, 30 mg    | dextrorphan-total | AS=1.0        | 1.21                      | 1.25                                        | A10        |
| po, cap, 30 mg    | dextrorphan-total | AS=1.0        | 1.30                      | 1.27                                        | A11        |
| po, cap, 30 mg    | dextrorphan-total | AS=3.0        | 1.15                      | 1.15                                        | A12        |
| po, cap, 30 mg    | dextrorphan-total | AS=1.0        | 1.18                      | 1.17                                        | A13        |
| po, cap, 30 mg    | dextrorphan-total | AS=2.0        | 1.14                      | 1.14                                        | A14        |
| po, cap, 30 mg    | dextrorphan-total | AS=3.0        | 1.44                      | 1.42                                        | A15        |
| po, cap, 30 mg    | dextrorphan-total | AS=1.0        | 1.13                      | 1.14                                        | A16        |
| po, cap, 30 mg    | dextrorphan-total | AS=2.0        | 1.17                      | 1.23                                        | C01        |
| po, cap, 30 mg    | dextrorphan-total | AS=2.0        | 1.54                      | 1.63                                        | C02        |
| po, cap, 30 mg    | dextrorphan-total | AS=2.0        | 1.88                      | 1.90                                        | C03        |
| po, cap, 30 mg    | dextrorphan-total | AS=2.0        | 1.56                      | 1.48                                        | C04        |
| po, cap, 30 mg    | dextrorphan-total | -             | 2.33                      | 2.33                                        | C05        |
| po, cap, 30 mg    | dextrorphan-total | AS=3.0        | 1.88                      | 1.87                                        | C06        |
| po, cap, 30 mg    | dextrorphan-total | -             | 1.25                      | 1.25                                        | C07        |
| po, cap, 30 mg    | dextrorphan-total | AS=0.5        | 1.39                      | 1.43                                        | C08        |
| po, cap, 30 mg    | dextrorphan-total | -             | 1.21                      | 1.21                                        | C09        |
| po, cap, 30 mg    | dextrorphan-total | AS=1.5        | 1.72                      | 1.70                                        | C10        |
| po, cap, 30 mg    | dextrorphan-total | AS=1.5        | 1.24                      | 1.36                                        | C11        |
| po, cap, 30 mg    | dextrorphan-total | AS=1.5        | 1.17                      | 1.25                                        | C12        |
| po, cap, 30 mg    | dextrorphan-total | -             | 1.08                      | 1.08                                        | C13        |
| po, cap, 30 mg    | dextrorphan-total | AS=1.5        | 1.22                      | 1.25                                        | C14        |
| po, cap, 30 mg    | dextrorphan-total | AS=1.0        | 1.11                      | 1.19                                        | C15        |
| po, cap, 30 mg    | dextrorphan-total | -             | 1.84                      | 1.84                                        | C16        |
| po, cap, 30 mg    | dextrorphan-total | AS=2.0        | 5.36                      | 5.22                                        | D01        |
| po, cap, 30 mg    | dextrorphan-total | AS=1.5        | 3.08                      | 2.76                                        | D02        |
| po, cap, 30 mg    | dextrorphan-total | AS=2.0        | 4.53                      | 4.83                                        | D03        |
| po, cap, 30 mg    | dextrorphan-total | AS=2.0        | 4.14                      | 3.61                                        | D04        |
| po, cap, 30 mg    | dextrorphan-total | -             | 2.85                      | 2.85                                        | D05        |
| po, cap, 30 mg    | dextrorphan-total | AS=1.0        | 3.06                      | 3.21                                        | D06        |
| po, cap, 30 mg    | dextrorphan-total | AS=2.0        | 5.92                      | 5.56                                        | D07        |
| po, cap, 30 mg    | dextrorphan-total | AS=1.0        | 2.70                      | 2.60                                        | D08        |
| po, cap, 30 mg    | dextrorphan-total | AS=2.0        | 3.52                      | 3.70                                        | D09        |
| po, cap, 30 mg    | dextrorphan-total | AS=1.5        | 5.51                      | 5.60                                        | D10        |
| po, cap, 30 mg    | dextrorphan-total | AS=1.0        | 4.09                      | 4.19                                        | D11        |
| po, cap, 30 mg    | dextrorphan-total | AS=1.0        | 4.84                      | 5.20                                        | D12        |
| po, cap, 30 mg    | dextrorphan-total | AS=1.0        | 1.62                      | 1.55                                        | E01        |
| po, cap, 30 mg    | dextrorphan-total | AS=1.0        | 1.38                      | 1.38                                        | E02        |
| po, cap, 30 mg    | dextrorphan-total | AS=1.0        | 2.26                      | 2.38                                        | E03        |

∴ not given, AS: CYP2D6 activity score, cap: capsule, CYP2D6: Cytochrome P450 2D6, ind.: individual, optim.: optimized, po: oral.

**Table S6.5.3:** Mean relative deviation of plasma concentration predictions (continued)

| Dosing                  | Molecule          | CYP2D6<br>status | MRD                          |                                                | Subject ID |
|-------------------------|-------------------|------------------|------------------------------|------------------------------------------------|------------|
|                         |                   |                  | population $k_{cat}$         | optim. ind. $k_{cat}$                          |            |
| po, cap, 30 mg          | dextrorphan-total | AS=2.0           | 3.32                         | 3.40                                           | E04        |
| po, cap, 30 mg          | dextrorphan-total | AS=2.0           | 3.73                         | 3.12                                           | E05        |
| po, cap, 30 mg          | dextrorphan-total | AS=1.0           | 3.07                         | 3.00                                           | E06        |
| po, cap, 30 mg          | dextrorphan-total | AS=2.0           | 4.03                         | 3.88                                           | E07        |
| po, cap, 30 mg          | dextrorphan-total | AS=2.0           | 3.75                         | 3.04                                           | E08        |
| po, cap, 30 mg          | dextrorphan-total | AS=2.0           | 4.07                         | 4.11                                           | E09        |
| po, cap, 30 mg          | dextrorphan-total | AS=1.0           | 4.00                         | 3.89                                           | E10        |
| po, cap, 30 mg          | dextrorphan-total | AS=1.0           | 5.17                         | 5.36                                           | E11        |
| po, cap, 30 mg          | dextrorphan-total | AS=2.0           | 2.84                         | 2.54                                           | E12        |
| po, cap, 30 mg          | dextrorphan-total | AS=2.0           | 4.36                         | 3.92                                           | E13        |
| po, cap, 30 mg          | dextrorphan-total | AS=1.0           | 3.34                         | 3.37                                           | E14        |
| po, cap, 30 mg          | dextrorphan-total | AS=2.0           | 4.95                         | 3.96                                           | E15        |
| po, cap, 30 mg          | dextrorphan-total | AS=1.0           | 3.48                         | 3.53                                           | E16        |
| po, cap, 30 mg          | dextrorphan-total | AS=1.0           | 1.95                         | 1.97                                           | E17        |
| po, cap, 30 mg          | dextrorphan-total | AS=2.0           | 9.98                         | 10.14                                          | E18        |
| po, cap, 30 mg          | dextrorphan-total | AS=2.0           | 8.25                         | 6.70                                           | E20        |
| po, cap, 30 mg          | dextrorphan-total | AS=1.0           | 6.08                         | 3.55                                           | E21        |
| po, cap, 30 mg          | dextrorphan-total | AS=3.0           | 2.67                         | 2.61                                           | E23        |
| po, cap, 30 mg          | dextrorphan-total | AS=2.0           | 5.23                         | 4.36                                           | E24        |
| po, cap, 30 mg          | dextrorphan-total | AS=2.0           | 6.30                         | 6.58                                           | E25        |
| po, cap, 30 mg          | dextrorphan-total | AS=1.0           | 3.94                         | 4.02                                           | E26        |
| po, cap, 30 mg          | dextrorphan-total | AS=2.0           | 5.41                         | 5.70                                           | E27        |
| po, cap, 30 mg          | dextrorphan-total | AS=1.0           | 2.98                         | 3.24                                           | E28        |
| po, cap, 30 mg          | dextrorphan-total | AS=1.0           | 3.71                         | 3.88                                           | E30        |
| MRD (dextrorphan-total) |                   |                  | 2.99 (1.08–9.98)<br>31/70    | 2.90 (1.08–10.14)<br>31/70 with MRD $\leq 2$   |            |
| Overall MRD             |                   |                  | 2.72 (1.08–14.00)<br>114/212 | 2.27 (1.08–14.00)<br>152/212 with MRD $\leq 2$ |            |

-.: not given, AS: CYP2D6 activity score, cap: capsule, CYP2D6: Cytochrome P450 2D6, ind.: individual, optim.: optimized, po: oral.

## S6.6 Goodness-of-Fit Plots

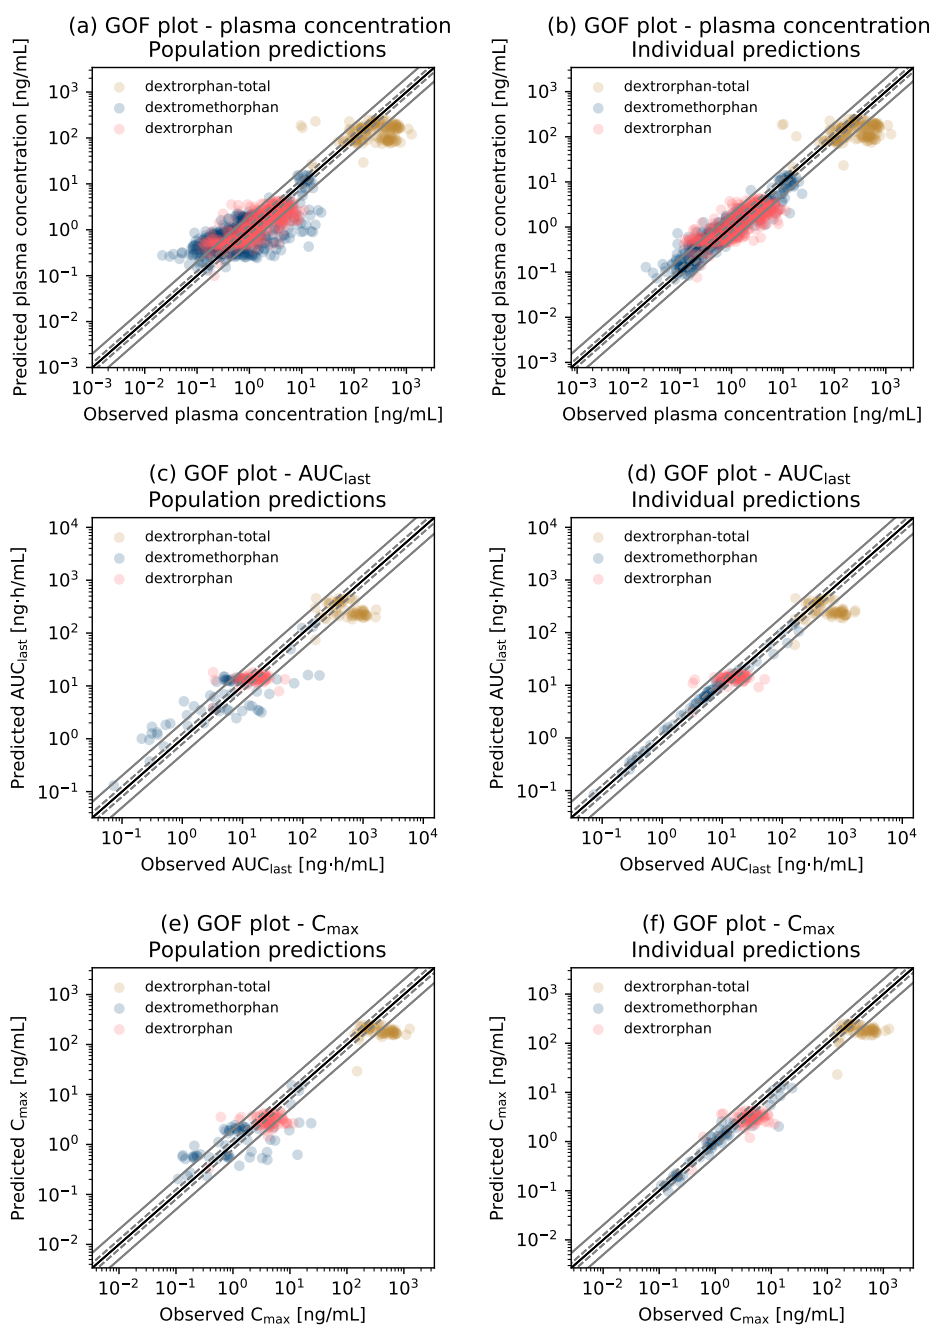

**Figure S6.6.14:** Goodness-of-fit plots for plasma concentrations,  $AUC_{last}$  and  $C_{max}$  values comparing predictions using the population  $k_{cat}$  (left column) to individual predictions (right column). Predicted versus observed (a, b) plasma concentrations, (c, d)  $AUC_{last}$  and (e, f)  $C_{max}$  values for dextromethorphan, dextrorphan and total dextrorphan (dextrorphan + dextrorphan *O*-glucuronide) for all individuals. The solid black line marks the line of identity, the dashed gray lines mark the 0.8- to 1.25-fold range, the solid gray lines indicate the 0.5- to 2-fold range. Colored symbols show the predicted compared to observed values for an individual study participant.  $AUC_{last}$ : AUC from the time of the first concentration measurement to the last time point of concentration measurement,  $C_{max}$ : peak plasma concentration.

## S6.7 GMFE of Predicted AUC<sub>last</sub> and C<sub>max</sub> Values

**Table S6.7.4:** Predicted and observed AUC<sub>last</sub> and C<sub>max</sub> values and geometric mean fold errors

| Molecule         | CYP2D6 status | AUC <sub>last</sub> [ng·h/mL] |                              |        |                             |                              | C <sub>max</sub> [ng/mL]    |                              |       |                             |                              | Subject ID |
|------------------|---------------|-------------------------------|------------------------------|--------|-----------------------------|------------------------------|-----------------------------|------------------------------|-------|-----------------------------|------------------------------|------------|
|                  |               | Pred                          |                              | Obs    | Pred/Obs                    |                              | Pred                        |                              | Obs   | Pred/Obs                    |                              |            |
|                  |               | population k <sub>cat</sub>   | ind. optim. k <sub>cat</sub> |        | population k <sub>cat</sub> | ind. optim. k <sub>cat</sub> | population k <sub>cat</sub> | ind. optim. k <sub>cat</sub> |       | population k <sub>cat</sub> | ind. optim. k <sub>cat</sub> |            |
| dextromethorphan | AS=0.25       | 131.51                        | 138.87                       | 146.34 | 0.90                        | 0.95                         | 11.92                       | 12.59                        | 14.33 | 0.83                        | 0.88                         | A01        |
| dextromethorphan | AS=1.5        | 7.84                          | 14.67                        | 17.31  | 0.45                        | 0.85                         | 1.30                        | 2.07                         | 4.53  | 0.29                        | 0.46                         | A02        |
| dextromethorphan | AS=2.0        | *                             | *                            | *      | *                           | *                            | 0.52                        | 0.09                         | 0.08  | 6.80                        | 1.21                         | A03        |
| dextromethorphan | AS=1.0        | 15.04                         | 5.75                         | 4.87   | 3.09                        | 1.18                         | 2.30                        | 0.85                         | 0.94  | 2.46                        | 0.90                         | A04        |
| dextromethorphan | AS=1.0        | 11.94                         | 4.62                         | 3.72   | 3.21                        | 1.24                         | 2.33                        | 0.93                         | 1.30  | 1.79                        | 0.72                         | A05        |
| dextromethorphan | AS=2.0        | 1.33                          | 0.34                         | 0.28   | 4.67                        | 1.20                         | 0.58                        | 0.20                         | 0.20  | 2.92                        | 1.03                         | A06        |
| dextromethorphan | AS=1.0        | 13.19                         | 8.83                         | 6.68   | 1.97                        | 1.05                         | 2.28                        | 1.43                         | 1.62  | 1.41                        | 0.89                         | A07        |
| dextromethorphan | AS=0.0        | 156.79                        | 146.08                       | 162.42 | 0.97                        | 0.90                         | 15.85                       | 14.08                        | 16.37 | 0.97                        | 0.86                         | A08        |
| dextromethorphan | AS=2.0        | 1.75                          | 1.60                         | 1.24   | 1.41                        | 1.29                         | 0.52                        | 0.48                         | 0.53  | 0.98                        | 0.90                         | A09        |
| dextromethorphan | AS=1.0        | 13.16                         | 6.41                         | 5.34   | 2.46                        | 1.20                         | 1.99                        | 0.92                         | 0.87  | 2.29                        | 1.06                         | A10        |
| dextromethorphan | AS=1.0        | 12.28                         | 6.40                         | 5.99   | 2.05                        | 1.07                         | 1.73                        | 0.85                         | 0.83  | 2.08                        | 1.03                         | A11        |
| dextromethorphan | AS=3.0        | 0.52                          | 0.25                         | 0.30   | 1.72                        | 0.88                         | 0.24                        | 0.15                         | 0.16  | 1.52                        | 0.94                         | A12        |
| dextromethorphan | AS=1.0        | 13.27                         | 7.01                         | 6.49   | 2.04                        | 1.08                         | 1.95                        | 0.96                         | 0.74  | 2.62                        | 1.29                         | A13        |
| dextromethorphan | AS=2.0        | 1.32                          | 0.45                         | 0.38   | 3.47                        | 1.18                         | 0.58                        | 0.19                         | 0.21  | 2.75                        | 0.91                         | A14        |
| dextromethorphan | AS=3.0        | 0.89                          | 0.56                         | 0.56   | 1.61                        | 1.12                         | 0.28                        | 0.20                         | 0.18  | 1.59                        | 1.10                         | A15        |
| dextromethorphan | AS=1.0        | 13.05                         | 5.18                         | 4.92   | 2.65                        | 1.05                         | 1.94                        | 0.73                         | 0.86  | 2.24                        | 0.84                         | A16        |
| dextromethorphan | AS=2.0        | 1.83                          | 0.56                         | 0.53   | 3.45                        | 1.06                         | 0.58                        | 0.15                         | 0.24  | 2.45                        | 0.64                         | C01        |
| dextromethorphan | AS=2.0        | 1.95                          | 0.73                         | 0.63   | 3.09                        | 1.16                         | 0.64                        | 0.21                         | 0.27  | 2.36                        | 0.78                         | C02        |
| dextromethorphan | AS=2.0        | 1.26                          | 0.32                         | 0.31   | 4.07                        | 1.03                         | 0.57                        | 0.13                         | 0.13  | 4.41                        | 1.04                         | C03        |
| dextromethorphan | AS=2.0        | 1.68                          | 0.38                         | 0.31   | 5.37                        | 1.20                         | 0.52                        | 0.10                         | 0.15  | 3.54                        | 0.66                         | C04        |
| dextromethorphan | -             | 15.57                         | 15.57                        | 48.37  | 0.32                        | 0.32                         | 2.58                        | 2.58                         | 10.31 | 0.25                        | 0.25                         | C05        |
| dextromethorphan | AS=3.0        | 0.13                          | 0.08                         | 0.07   | 1.79                        | 1.15                         | 0.21                        | 0.13                         | 0.11  | 1.93                        | 1.18                         | C06        |
| dextromethorphan | -             | 7.47                          | 7.47                         | 0.69   | 10.74                       | 10.74                        | 2.08                        | 2.08                         | 0.24  | 8.53                        | 8.53                         | C07        |
| dextromethorphan | AS=0.5        | 49.56                         | 63.17                        | 62.68  | 0.79                        | 1.01                         | 6.45                        | 7.53                         | 10.39 | 0.62                        | 0.72                         | C08        |
| dextromethorphan | -             | 12.79                         | 12.79                        | 0.87   | 14.70                       | 14.70                        | 2.41                        | 2.41                         | 0.29  | 8.23                        | 8.23                         | C09        |
| dextromethorphan | AS=1.5        | 7.15                          | 8.02                         | 6.61   | 1.08                        | 1.21                         | 1.28                        | 1.36                         | 1.78  | 0.72                        | 0.77                         | C10        |
| dextromethorphan | AS=1.5        | 5.10                          | 1.38                         | 1.06   | 4.80                        | 1.30                         | 0.99                        | 0.21                         | 0.21  | 4.74                        | 1.02                         | C11        |
| dextromethorphan | AS=1.5        | 6.59                          | 3.64                         | 2.91   | 2.27                        | 1.25                         | 1.16                        | 0.59                         | 0.56  | 2.09                        | 1.07                         | C12        |
| dextromethorphan | -             | 7.90                          | 7.90                         | 0.73   | 10.77                       | 10.77                        | 2.22                        | 2.22                         | 0.26  | 8.51                        | 8.51                         | C13        |
| dextromethorphan | AS=1.5        | 6.07                          | 4.27                         | 3.38   | 1.79                        | 1.26                         | 1.01                        | 0.68                         | 0.74  | 1.36                        | 0.92                         | C14        |
| dextromethorphan | AS=1.0        | 14.86                         | 6.01                         | 5.05   | 2.94                        | 1.19                         | 2.53                        | 1.03                         | 1.09  | 2.33                        | 0.95                         | C15        |
| dextromethorphan | -             | 12.49                         | 12.49                        | 3.41   | 3.66                        | 3.66                         | 1.93                        | 1.93                         | 0.87  | 2.23                        | 2.23                         | C16        |

\*: no AUC<sub>last</sub> calculated due to insufficient amount of observed data points, -: not available, †: AUC<sub>last</sub> and C<sub>max</sub> values as well as corresponding ratios were calculated based on a small number of observed data points (n = 3 for studies A and B, n = 2 for studies D and E) and should be interpreted with caution, AS: CYP2D6 activity score, AUC: area under the plasma concentration-time curve, AUC<sub>last</sub>: AUC from the time of the first concentration measurement to the last time of concentration measurement, C<sub>max</sub>: peak plasma concentration, CYP2D6: Cytochrome P450 2D6, obs: observed, po: oral, ind.: individual, optim.: optimized, pred: predicted.

**Table S6.7.4:** Predicted and observed AUC<sub>last</sub> and C<sub>max</sub> values and geometric mean fold errors (continued)

| Molecule         | CYP2D6 status | AUC <sub>last</sub> [ng·h/mL] |                              |        |                             |                              | C <sub>max</sub> [ng/mL]    |                              |       |                             |                              | Subject ID |
|------------------|---------------|-------------------------------|------------------------------|--------|-----------------------------|------------------------------|-----------------------------|------------------------------|-------|-----------------------------|------------------------------|------------|
|                  |               | Pred                          |                              | Obs    | Pred/Obs                    |                              | Pred                        |                              | Obs   | Pred/Obs                    |                              |            |
|                  |               | population k <sub>cat</sub>   | ind. optim. k <sub>cat</sub> |        | population k <sub>cat</sub> | ind. optim. k <sub>cat</sub> | population k <sub>cat</sub> | ind. optim. k <sub>cat</sub> |       | population k <sub>cat</sub> | ind. optim. k <sub>cat</sub> |            |
| dextromethorphan | AS=2.0        | 3.66                          | 4.46                         | 3.63   | 1.01                        | 1.23                         | 0.61                        | 0.77                         | 0.72  | 0.84                        | 1.07                         | D01        |
| dextromethorphan | AS=1.5        | 7.04                          | 22.06                        | 27.89  | 0.25                        | 0.79                         | 1.25                        | 3.46                         | 5.48  | 0.23                        | 0.63                         | D02        |
| dextromethorphan | AS=2.0        | 1.00                          | 0.22                         | 0.21   | 4.73                        | 1.02                         | 0.61                        | 0.13                         | 0.13  | 4.58                        | 0.95                         | D03        |
| dextromethorphan | AS=2.0        | 4.27                          | 14.10                        | 12.89  | 0.33                        | 1.09                         | 0.72                        | 2.31                         | 2.11  | 0.34                        | 1.09                         | D04        |
| dextromethorphan | -             | 14.27                         | 14.27                        | 8.66   | 1.65                        | 1.65                         | 2.40                        | 2.40                         | 2.44  | 0.98                        | 0.98                         | D05        |
| dextromethorphan | AS=1.0        | 12.76                         | 6.27                         | 5.56   | 2.30                        | 1.13                         | 2.15                        | 1.05                         | 1.13  | 1.90                        | 0.93                         | D06        |
| dextromethorphan | AS=2.0        | 3.36                          | 5.41                         | 4.11   | 0.82                        | 1.32                         | 0.55                        | 0.94                         | 0.80  | 0.68                        | 1.17                         | D07        |
| dextromethorphan | AS=1.0        | 13.28                         | 28.47                        | 37.31  | 0.36                        | 0.76                         | 2.31                        | 4.29                         | 5.16  | 0.45                        | 0.83                         | D08        |
| dextromethorphan | AS=2.0        | 1.20                          | 0.43                         | 0.39   | 3.09                        | 1.12                         | 0.54                        | 0.19                         | 0.21  | 2.56                        | 0.90                         | D09        |
| dextromethorphan | AS=1.5        | 6.90                          | 6.15                         | 4.96   | 1.39                        | 1.24                         | 1.23                        | 1.06                         | 1.19  | 1.03                        | 0.89                         | D10        |
| dextromethorphan | AS=1.0        | 13.70                         | 11.47                        | 9.73   | 1.41                        | 1.18                         | 2.38                        | 1.89                         | 2.31  | 1.03                        | 0.82                         | D11        |
| dextromethorphan | AS=1.0        | 12.84                         | 7.53                         | 5.80   | 2.21                        | 1.30                         | 2.21                        | 1.27                         | 1.10  | 2.01                        | 1.16                         | D12        |
| dextromethorphan | AS=1.0        | 11.15                         | 14.17                        | 11.92  | 0.94                        | 1.19                         | 2.07                        | 2.44                         | 1.83  | 1.13                        | 1.33                         | E01        |
| dextromethorphan | AS=1.0        | 12.49                         | 9.83                         | 9.76   | 1.28                        | 1.01                         | 1.81                        | 1.42                         | 1.53  | 1.19                        | 0.93                         | E02        |
| dextromethorphan | AS=1.0        | 12.37                         | 8.14                         | 6.28   | 1.97                        | 1.30                         | 2.09                        | 1.30                         | 1.62  | 1.29                        | 0.80                         | E03        |
| dextromethorphan | AS=2.0        | 3.48                          | 2.66                         | 2.03   | 1.72                        | 1.31                         | 0.55                        | 0.39                         | 0.38  | 1.45                        | 1.01                         | E04        |
| dextromethorphan | AS=2.0        | 3.16                          | 20.19                        | 20.65  | 0.15                        | 0.98                         | 0.49                        | 3.04                         | 4.02  | 0.12                        | 0.76                         | E05        |
| dextromethorphan | AS=1.0        | 12.47                         | 14.99                        | 14.40  | 0.87                        | 1.04                         | 2.14                        | 2.45                         | 2.82  | 0.76                        | 0.87                         | E06        |
| dextromethorphan | AS=2.0        | 3.90                          | 5.44                         | 4.37   | 0.89                        | 1.25                         | 0.59                        | 0.86                         | 0.87  | 0.68                        | 0.99                         | E07        |
| dextromethorphan | AS=2.0        | 3.38                          | 19.53                        | 18.81  | 0.18                        | 1.04                         | 0.53                        | 3.04                         | 3.26  | 0.16                        | 0.93                         | E08        |
| dextromethorphan | AS=2.0        | 3.80                          | 3.46                         | 3.25   | 1.17                        | 1.06                         | 0.61                        | 0.54                         | 0.77  | 0.79                        | 0.70                         | E09        |
| dextromethorphan | AS=1.0        | 11.23                         | 39.11                        | 71.91  | 0.16                        | 0.54                         | 2.09                        | 5.50                         | 9.74  | 0.21                        | 0.56                         | E10        |
| dextromethorphan | AS=1.0        | 11.70                         | 8.43                         | 7.14   | 1.64                        | 1.18                         | 1.91                        | 1.30                         | 1.18  | 1.63                        | 1.11                         | E11        |
| dextromethorphan | AS=2.0        | 3.40                          | 7.48                         | 5.98   | 0.57                        | 1.25                         | 0.56                        | 1.27                         | 0.83  | 0.67                        | 1.53                         | E12        |
| dextromethorphan | AS=2.0        | 3.48                          | 7.37                         | 5.61   | 0.62                        | 1.31                         | 0.57                        | 1.26                         | 0.84  | 0.68                        | 1.49                         | E13        |
| dextromethorphan | AS=1.0        | 12.15                         | 11.29                        | 9.66   | 1.26                        | 1.17                         | 2.07                        | 1.83                         | 1.19  | 1.73                        | 1.54                         | E14        |
| dextromethorphan | AS=2.0        | 4.16                          | 16.56                        | 14.35  | 0.29                        | 1.15                         | 0.70                        | 2.80                         | 3.96  | 0.18                        | 0.71                         | E15        |
| dextromethorphan | AS=1.0        | 12.90                         | 9.78                         | 8.47   | 1.52                        | 1.15                         | 2.00                        | 1.47                         | 1.48  | 1.35                        | 1.00                         | E16        |
| dextromethorphan | AS=1.0        | 16.05                         | 63.43                        | 121.81 | 0.13                        | 0.52                         | 2.91                        | 8.47                         | 14.57 | 0.20                        | 0.58                         | E17        |
| dextromethorphan | AS=2.0        | 3.51                          | 11.55                        | 17.93  | 0.20                        | 0.64                         | 0.62                        | 2.02                         | 13.60 | 0.05                        | 0.15                         | E18        |
| dextromethorphan | AS=2.0        | 2.45                          | 11.75                        | 7.90   | 0.31                        | 1.49                         | 0.54                        | 2.56                         | 1.29  | 0.42                        | 1.98                         | E20        |
| dextromethorphan | AS=1.0        | 15.78                         | 105.27                       | 189.37 | 0.08                        | 0.56                         | 2.79                        | 12.25                        | 23.61 | 0.12                        | 0.52                         | E21        |
| dextromethorphan | AS=0.0        | 124.38                        | 98.69                        | 97.59  | 1.27                        | 1.01                         | 15.80                       | 10.94                        | 10.67 | 1.48                        | 1.03                         | E22        |
| dextromethorphan | AS=3.0        | 1.97                          | 2.79                         | 2.30   | 0.85                        | 1.21                         | 0.24                        | 0.39                         | 0.35  | 0.67                        | 1.10                         | E23        |
| dextromethorphan | AS=2.0        | 3.36                          | 11.76                        | 9.91   | 0.34                        | 1.19                         | 0.55                        | 1.93                         | 1.97  | 0.28                        | 0.98                         | E24        |

54

\*: no AUC<sub>last</sub> calculated due to insufficient amount of observed data points, -: not available, †: AUC<sub>last</sub> and C<sub>max</sub> values as well as corresponding ratios were calculated based on a small number of observed data points (n = 3 for studies A and B, n = 2 for studies D and E) and should be interpreted with caution, AS: CYP2D6 activity score, AUC: area under the plasma concentration-time curve, AUC<sub>last</sub>: AUC from the time of the first concentration measurement to the last time of concentration measurement, C<sub>max</sub>: peak plasma concentration, CYP2D6: Cytochrome P450 2D6, obs: observed, po: oral, ind.: individual, optim.: optimized, pred: predicted.

**Table S6.7.4:** Predicted and observed AUC<sub>last</sub> and C<sub>max</sub> values and geometric mean fold errors (continued)

| Molecule                | CYP2D6 status | AUC <sub>last</sub> [ng·h/mL] |                              |                                          |                             |                              | C <sub>max</sub> [ng/mL]                 |                              |      |                             |                              | Subject ID |
|-------------------------|---------------|-------------------------------|------------------------------|------------------------------------------|-----------------------------|------------------------------|------------------------------------------|------------------------------|------|-----------------------------|------------------------------|------------|
|                         |               | Pred                          |                              | Obs                                      | Pred/Obs                    |                              | Pred                                     |                              | Obs  | Pred/Obs                    |                              |            |
|                         |               | population k <sub>cat</sub>   | ind. optim. k <sub>cat</sub> |                                          | population k <sub>cat</sub> | ind. optim. k <sub>cat</sub> | population k <sub>cat</sub>              | ind. optim. k <sub>cat</sub> |      | population k <sub>cat</sub> | ind. optim. k <sub>cat</sub> |            |
| dextromethorphan        | AS=2.0        | 4.11                          | 1.78                         | 1.56                                     | 2.63                        | 1.14                         | 0.61                                     | 0.19                         | 0.23 | 2.62                        | 0.84                         | E25        |
| dextromethorphan        | AS=1.0        | 14.14                         | 11.00                        | 9.18                                     | 1.54                        | 1.20                         | 2.29                                     | 1.74                         | 1.60 | 1.43                        | 1.09                         | E26        |
| dextromethorphan        | AS=2.0        | 3.38                          | 1.44                         | 1.20                                     | 2.82                        | 1.20                         | 0.55                                     | 0.22                         | 0.20 | 2.73                        | 1.12                         | E27        |
| dextromethorphan        | AS=1.0        | 12.84                         | 6.00                         | 5.22                                     | 2.46                        | 1.15                         | 2.09                                     | 0.97                         | 0.69 | 3.01                        | 1.39                         | E28        |
| dextromethorphan        | AS=1.0        | 14.37                         | 10.44                        | 8.06                                     | 1.78                        | 1.30                         | 2.39                                     | 1.63                         | 1.48 | 1.62                        | 1.11                         | E30        |
| GMFE (dextromethorphan) |               | population k <sub>cat</sub>   |                              | 3.14 (1.01–14.70)<br>31/71 with GMFE ≤ 2 |                             |                              | 3.04 (1.02–20.00)<br>33/72 with GMFE ≤ 2 |                              |      |                             |                              |            |
|                         |               | ind. optim. k <sub>cat</sub>  |                              | 1.75 (1.01–14.70)<br>66/71 with GMFE ≤ 2 |                             |                              | 1.67 (1.00–8.53)<br>65/72 with GMFE ≤ 2  |                              |      |                             |                              |            |
| dextrorphan             | AS=0.25       | 3.80                          | 3.05                         | 3.20                                     | 1.19                        | 0.95                         | 0.34                                     | 0.27                         | 0.38 | 0.90                        | 0.71                         | A01        |
| dextrorphan             | AS=1.5        | 15.45                         | 15.23                        | 23.58                                    | 0.66                        | 0.65                         | 3.59                                     | 2.73                         | 6.20 | 0.58                        | 0.44                         | A02        |
| dextrorphan             | AS=2.0        | 13.63                         | 13.54                        | 12.74                                    | 1.07                        | 1.06                         | 3.24                                     | 3.42                         | 3.76 | 0.86                        | 0.91                         | A03        |
| dextrorphan             | AS=1.0        | 14.70                         | 15.01                        | 23.58                                    | 0.62                        | 0.64                         | 2.67                                     | 3.27                         | 6.07 | 0.44                        | 0.54                         | A04        |
| dextrorphan             | AS=1.0        | 15.18                         | 15.39                        | 20.28                                    | 0.75                        | 0.76                         | 2.92                                     | 3.50                         | 8.57 | 0.34                        | 0.41                         | A05        |
| dextrorphan             | AS=2.0        | 14.62                         | 14.61                        | 19.99                                    | 0.73                        | 0.73                         | 3.22                                     | 3.39                         | 5.77 | 0.56                        | 0.59                         | A06        |
| dextrorphan             | AS=1.0        | 14.91                         | 15.08                        | 18.44                                    | 0.81                        | 0.82                         | 2.79                                     | 2.91                         | 5.10 | 0.55                        | 0.57                         | A07        |
| dextrorphan             | AS=2.0        | 13.28                         | 13.28                        | 18.38                                    | 0.72                        | 0.72                         | 2.95                                     | 2.97                         | 5.97 | 0.49                        | 0.50                         | A09        |
| dextrorphan             | AS=1.0        | 13.31                         | 13.66                        | 17.41                                    | 0.76                        | 0.78                         | 2.51                                     | 2.89                         | 2.75 | 0.91                        | 1.05                         | A10        |
| dextrorphan             | AS=1.0        | 11.58                         | 11.85                        | 18.45                                    | 0.63                        | 0.64                         | 2.03                                     | 2.30                         | 3.63 | 0.56                        | 0.63                         | A11        |
| dextrorphan             | AS=3.0        | 14.86                         | 12.17                        | 24.21                                    | 0.61                        | 0.52                         | 4.21                                     | 4.20                         | 4.22 | 1.00                        | 1.00                         | A12        |
| dextrorphan             | AS=1.0        | 13.19                         | 13.71                        | 24.45                                    | 0.54                        | 0.56                         | 2.40                                     | 2.71                         | 5.30 | 0.45                        | 0.51                         | A13        |
| dextrorphan             | AS=2.0        | 14.82                         | 14.78                        | 25.10                                    | 0.59                        | 0.59                         | 3.39                                     | 3.56                         | 7.03 | 0.48                        | 0.51                         | A14        |
| dextrorphan             | AS=3.0        | 16.86                         | 16.83                        | 13.25                                    | 1.27                        | 1.27                         | 4.30                                     | 4.27                         | 3.47 | 1.24                        | 1.23                         | A15        |
| dextrorphan             | AS=1.0        | 12.84                         | 13.11                        | 14.73                                    | 0.87                        | 0.89                         | 2.34                                     | 2.83                         | 4.32 | 0.54                        | 0.65                         | A16        |
| dextrorphan             | AS=2.0        | 13.95                         | 13.88                        | 9.57                                     | 1.46                        | 1.45                         | 3.37                                     | 3.56                         | 5.38 | 0.63                        | 0.66                         | C01        |
| dextrorphan             | AS=2.0        | 15.21                         | 15.12                        | 10.55                                    | 1.44                        | 1.43                         | 3.81                                     | 4.00                         | 4.20 | 0.91                        | 0.95                         | C02        |
| dextrorphan             | AS=2.0        | 15.28                         | 15.08                        | 11.83                                    | 1.29                        | 1.28                         | 3.80                                     | 4.00                         | 3.01 | 1.26                        | 1.33                         | C03        |
| dextrorphan             | AS=2.0        | 12.47                         | 12.42                        | 8.22                                     | 1.52                        | 1.51                         | 2.93                                     | 3.11                         | 3.09 | 0.95                        | 1.01                         | C04        |
| dextrorphan             | -             | 13.91                         | 13.91                        | 18.28                                    | 0.76                        | 0.76                         | 2.59                                     | 2.59                         | 4.07 | 0.64                        | 0.64                         | C05        |
| dextrorphan             | AS=3.0        | 13.53                         | 13.49                        | 10.29                                    | 1.31                        | 1.31                         | 3.61                                     | 3.61                         | 4.63 | 0.78                        | 0.78                         | C06        |
| dextrorphan             | -             | 12.14                         | 12.41                        | 14.67                                    | 0.83                        | 0.83                         | 2.34                                     | 2.34                         | 3.89 | 0.60                        | 0.60                         | C07        |

\*: no AUC<sub>last</sub> calculated due to insufficient amount of observed data points, -: not available, †: AUC<sub>last</sub> and C<sub>max</sub> values as well as corresponding ratios were calculated based on a small number of observed data points (n = 3 for studies A and B, n = 2 for studies D and E) and should be interpreted with caution, AS: CYP2D6 activity score, AUC: area under the plasma concentration-time curve, AUC<sub>last</sub>: AUC from the time of the first concentration measurement to the last time of concentration measurement, C<sub>max</sub>: peak plasma concentration, CYP2D6: Cytochrome P450 2D6, obs: observed, po: oral, ind.: individual, optim.: optimized, pred: predicted.

**Table S6.7.4:** Predicted and observed AUC<sub>last</sub> and C<sub>max</sub> values and geometric mean fold errors (continued)

| Molecule    | CYP2D6 status | AUC <sub>last</sub> [ng·h/mL] |                              |       |                             |                              | C <sub>max</sub> [ng/mL]    |                              |       |                             |                              | Subject ID |
|-------------|---------------|-------------------------------|------------------------------|-------|-----------------------------|------------------------------|-----------------------------|------------------------------|-------|-----------------------------|------------------------------|------------|
|             |               | Pred                          |                              | Obs   | Pred/Obs                    |                              | Pred                        |                              | Obs   | Pred/Obs                    |                              |            |
|             |               | population k <sub>cat</sub>   | ind. optim. k <sub>cat</sub> |       | population k <sub>cat</sub> | ind. optim. k <sub>cat</sub> | population k <sub>cat</sub> | ind. optim. k <sub>cat</sub> |       | population k <sub>cat</sub> | ind. optim. k <sub>cat</sub> |            |
| dextrorphan | AS=0.5        | 10.52                         | 9.41                         | 12.19 | 0.86                        | 0.77                         | 1.48                        | 1.20                         | 4.14  | 0.36                        | 0.29                         | C08        |
| dextrorphan | -             | 13.49                         | 13.49                        | 9.56  | 1.41                        | 1.41                         | 2.58                        | 2.58                         | 3.68  | 0.70                        | 0.70                         | C09        |
| dextrorphan | AS=1.5        | 14.54                         | 14.50                        | 21.27 | 0.68                        | 0.68                         | 3.36                        | 3.15                         | 7.57  | 0.44                        | 0.42                         | C10        |
| dextrorphan | AS=1.5        | 11.63                         | 11.67                        | 16.35 | 0.71                        | 0.71                         | 2.55                        | 2.93                         | 4.25  | 0.60                        | 0.69                         | C11        |
| dextrorphan | AS=1.5        | 14.11                         | 14.13                        | 7.32  | 1.93                        | 1.93                         | 3.30                        | 3.59                         | 1.28  | 2.58                        | 2.80                         | C12        |
| dextrorphan | -             | 12.88                         | 12.88                        | 10.47 | 1.23                        | 1.23                         | 2.50                        | 2.50                         | 3.55  | 0.70                        | 0.70                         | C13        |
| dextrorphan | AS=1.5        | 11.98                         | 12.03                        | 16.33 | 0.73                        | 0.74                         | 2.65                        | 2.76                         | 4.38  | 0.60                        | 0.63                         | C14        |
| dextrorphan | AS=1.0        | 14.89                         | 15.25                        | 24.67 | 0.60                        | 0.62                         | 2.85                        | 3.44                         | 8.85  | 0.32                        | 0.39                         | C15        |
| dextrorphan | -             | 11.09                         | 11.09                        | 12.72 | 0.87                        | 0.87                         | 2.03                        | 2.03                         | 4.12  | 0.49                        | 0.49                         | C16        |
| dextrorphan | AS=2.0        | 15.91                         | 15.93                        | 23.63 | 0.67                        | 0.67                         | 4.28                        | 4.15                         | 5.46  | 0.78                        | 0.76                         | D01        |
| dextrorphan | AS=1.5        | 13.31                         | 12.96                        | 50.92 | 0.26                        | 0.25                         | 3.17                        | 2.29                         | 11.43 | 0.28                        | 0.20                         | D02        |
| dextrorphan | AS=2.0        | 13.33                         | 13.40                        | 8.58  | 1.55                        | 1.56                         | 3.35                        | 3.17                         | 4.20  | 0.80                        | 0.76                         | D03        |
| dextrorphan | AS=2.0        | 15.79                         | 15.44                        | 18.62 | 0.85                        | 0.83                         | 3.77                        | 2.78                         | 4.74  | 0.80                        | 0.59                         | D04        |
| dextrorphan | -             | 14.40                         | 14.40                        | 13.21 | 1.09                        | 1.09                         | 2.89                        | 2.89                         | 6.20  | 0.47                        | 0.47                         | D05        |
| dextrorphan | AS=1.0        | 13.87                         | 14.10                        | 12.29 | 1.13                        | 1.15                         | 2.81                        | 3.19                         | 4.38  | 0.64                        | 0.73                         | D06        |
| dextrorphan | AS=2.0        | 14.10                         | 14.11                        | 10.13 | 1.39                        | 1.39                         | 3.67                        | 3.36                         | 3.86  | 0.95                        | 0.87                         | D07        |
| dextrorphan | AS=1.0        | 14.11                         | 13.25                        | 13.82 | 1.02                        | 0.96                         | 2.86                        | 2.19                         | 3.73  | 0.77                        | 0.59                         | D08        |
| dextrorphan | AS=2.0        | 13.91                         | 12.80                        | 3.47  | 4.00                        | 3.68                         | 3.55                        | 3.72                         | 1.39  | 2.56                        | 2.68                         | D09        |
| dextrorphan | AS=1.5        | 14.03                         | 14.04                        | 28.51 | 0.49                        | 0.49                         | 3.21                        | 3.19                         | 7.54  | 0.43                        | 0.42                         | D10        |
| dextrorphan | AS=1.0        | 14.49                         | 14.59                        | 21.95 | 0.66                        | 0.66                         | 2.91                        | 2.80                         | 5.30  | 0.55                        | 0.53                         | D11        |
| dextrorphan | AS=1.0        | 13.43                         | 13.63                        | 18.50 | 0.73                        | 0.74                         | 2.71                        | 2.94                         | 4.74  | 0.57                        | 0.62                         | D12        |
| dextrorphan | AS=1.0        | 12.86                         | 12.76                        | 17.56 | 0.73                        | 0.73                         | 2.85                        | 2.57                         | 3.91  | 0.73                        | 0.66                         | E01        |
| dextrorphan | AS=1.0        | 11.89                         | 12.08                        | 22.24 | 0.53                        | 0.54                         | 2.16                        | 2.15                         | 5.02  | 0.43                        | 0.43                         | E02        |
| dextrorphan | AS=1.0        | 9.00                          | 8.60                         | 8.75  | 1.03                        | 0.98                         | 2.70                        | 2.63                         | 3.68  | 0.73                        | 0.71                         | E03        |
| dextrorphan | AS=2.0        | 14.42                         | 14.40                        | 12.37 | 1.17                        | 1.16                         | 3.69                        | 3.78                         | 3.71  | 0.99                        | 1.02                         | E04        |
| dextrorphan | AS=2.0        | 12.22                         | 11.43                        | 10.42 | 1.17                        | 1.10                         | 2.99                        | 1.93                         | 3.32  | 0.90                        | 0.58                         | E05        |
| dextrorphan | AS=1.0        | 13.61                         | 13.49                        | 25.24 | 0.54                        | 0.53                         | 2.77                        | 2.53                         | 7.80  | 0.36                        | 0.32                         | E06        |
| dextrorphan | AS=2.0        | 15.58                         | 15.56                        | 27.20 | 0.57                        | 0.57                         | 3.87                        | 3.66                         | 7.16  | 0.54                        | 0.51                         | E07        |
| dextrorphan | AS=2.0        | 13.86                         | 13.23                        | 19.02 | 0.73                        | 0.70                         | 3.51                        | 2.33                         | 5.12  | 0.69                        | 0.45                         | E08        |
| dextrorphan | AS=2.0        | 16.43                         | 16.42                        | 23.77 | 0.69                        | 0.69                         | 4.26                        | 4.29                         | 7.10  | 0.60                        | 0.60                         | E09        |
| dextrorphan | AS=1.0        | 12.90                         | 11.48                        | 22.31 | 0.58                        | 0.51                         | 2.86                        | 1.79                         | 3.40  | 0.84                        | 0.53                         | E10        |
| dextrorphan | AS=1.0        | 12.05                         | 12.20                        | 19.52 | 0.62                        | 0.63                         | 2.35                        | 2.39                         | 4.17  | 0.56                        | 0.57                         | E11        |
| dextrorphan | AS=2.0        | 14.21                         | 14.20                        | 9.07  | 1.57                        | 1.56                         | 3.70                        | 3.12                         | 2.16  | 1.71                        | 1.44                         | E12        |
| dextrorphan | AS=2.0        | 15.01                         | 15.01                        | 18.21 | 0.82                        | 0.82                         | 3.96                        | 3.36                         | 3.50  | 1.13                        | 0.96                         | E13        |
| dextrorphan | AS=1.0        | 13.05                         | 13.09                        | 13.44 | 0.97                        | 0.97                         | 2.64                        | 2.51                         | 3.24  | 0.81                        | 0.77                         | E14        |

56

\*: no AUC<sub>last</sub> calculated due to insufficient amount of observed data points, -: not available, †: AUC<sub>last</sub> and C<sub>max</sub> values as well as corresponding ratios were calculated based on a small number of observed data points (n = 3 for studies A and B, n = 2 for studies D and E) and should be interpreted with caution, AS: CYP2D6 activity score, AUC: area under the plasma concentration-time curve, AUC<sub>last</sub>: AUC from the time of the first concentration measurement to the last time of concentration measurement, C<sub>max</sub>: peak plasma concentration, CYP2D6: Cytochrome P450 2D6, obs: observed, po: oral, ind.: individual, optim.: optimized, pred: predicted.



**Table S6.7.4:** Predicted and observed AUC<sub>last</sub> and C<sub>max</sub> values and geometric mean fold errors (continued)

| Molecule                       | CYP2D6 status | AUC <sub>last</sub> [ng·h/mL] |                              |                                         |                             |                              | C <sub>max</sub> [ng/mL]    |                              |                                         |                             |                              | Subject ID |
|--------------------------------|---------------|-------------------------------|------------------------------|-----------------------------------------|-----------------------------|------------------------------|-----------------------------|------------------------------|-----------------------------------------|-----------------------------|------------------------------|------------|
|                                |               | Pred                          |                              | Obs                                     | Pred/Obs                    |                              | Pred                        |                              | Obs                                     | Pred/Obs                    |                              |            |
|                                |               | population k <sub>cat</sub>   | ind. optim. k <sub>cat</sub> |                                         | population k <sub>cat</sub> | ind. optim. k <sub>cat</sub> | population k <sub>cat</sub> | ind. optim. k <sub>cat</sub> |                                         | population k <sub>cat</sub> | ind. optim. k <sub>cat</sub> |            |
| dextrorphan                    | AS=2.0        | 17.65                         | 17.41                        | 19.88                                   | 0.89                        | 0.88                         | 4.75                        | 3.33                         | 6.59                                    | 0.72                        | 0.51                         | E15        |
| dextrorphan                    | AS=1.0        | 13.17                         | 13.35                        | 15.34                                   | 0.86                        | 0.87                         | 2.47                        | 2.47                         | 4.27                                    | 0.58                        | 0.58                         | E16        |
| dextrorphan                    | AS=1.0        | 18.06                         | 15.15                        | 15.19                                   | 1.19                        | 1.00                         | 3.87                        | 2.14                         | 2.54                                    | 1.52                        | 0.84                         | E17        |
| dextrorphan                    | AS=2.0        | 13.33                         | 13.67                        | 10.96                                   | 1.22                        | 1.25                         | 4.21                        | 3.15                         | 4.68                                    | 0.90                        | 0.67                         | E18        |
| dextrorphan                    | AS=2.0        | 7.91                          | 9.23                         | 40.37                                   | 0.20                        | 0.23                         | 3.51                        | 2.48                         | 9.09                                    | 0.39                        | 0.27                         | E20        |
| dextrorphan                    | AS=1.0        | 18.07                         | 10.95                        | 3.25                                    | 5.56                        | 3.37                         | 3.79                        | 1.24                         | 0.61                                    | 6.19                        | 2.03                         | E21        |
| dextrorphan                    | AS=3.0        | 16.36                         | 16.40                        | 18.37                                   | 0.89                        | 0.89                         | 4.32                        | 4.24                         | 5.02                                    | 0.86                        | 0.84                         | E23        |
| dextrorphan                    | AS=2.0        | 13.86                         | 13.71                        | 20.35                                   | 0.68                        | 0.67                         | 3.59                        | 2.66                         | 5.74                                    | 0.63                        | 0.46                         | E24        |
| dextrorphan                    | AS=2.0        | 15.06                         | 15.15                        | 19.11                                   | 0.79                        | 0.79                         | 3.76                        | 3.51                         | 3.83                                    | 0.98                        | 0.91                         | E25        |
| dextrorphan                    | AS=1.0        | 13.99                         | 14.16                        | 12.58                                   | 1.11                        | 1.13                         | 2.59                        | 2.58                         | 2.75                                    | 0.94                        | 0.94                         | E26        |
| dextrorphan                    | AS=2.0        | 14.10                         | 14.03                        | 9.45                                    | 1.49                        | 1.48                         | 3.65                        | 3.81                         | 2.67                                    | 1.37                        | 1.43                         | E27        |
| dextrorphan                    | AS=1.0        | 13.59                         | 13.87                        | 13.29                                   | 1.02                        | 1.04                         | 2.67                        | 3.10                         | 2.57                                    | 1.04                        | 1.20                         | E28        |
| dextrorphan                    | AS=1.0        | 15.52                         | 15.70                        | 15.96                                   | 0.97                        | 0.98                         | 3.11                        | 3.21                         | 4.68                                    | 0.66                        | 0.69                         | E30        |
| GMFE (dextrorphan)             |               | population k <sub>cat</sub>   |                              | 1.56 (1.02–5.56)<br>65/71 with GMFE ≤ 2 |                             |                              |                             |                              | 1.74 (1.02–6.19)<br>52/70 with GMFE ≤ 2 |                             |                              |            |
|                                |               | ind. optim. k <sub>cat</sub>  |                              | 1.52 (1.00–4.35)<br>65/71 with GMFE ≤ 2 |                             |                              |                             |                              | 1.77 (1.00–5.00)<br>53/70 with GMFE ≤ 2 |                             |                              |            |
| dextrorphan-total <sup>†</sup> | AS=0.25       | 74.20                         | 58.21                        | 161.67                                  | 0.46                        | 0.36                         | 29.23                       | 23.13                        | 150.57                                  | 0.19                        | 0.15                         | A01        |
| dextrorphan-total <sup>†</sup> | AS=1.5        | 454.99                        | 475.88                       | 601.15                                  | 0.76                        | 0.79                         | 279.59                      | 240.73                       | 357.76                                  | 0.78                        | 0.67                         | A02        |
| dextrorphan-total <sup>†</sup> | AS=2.0        | 183.04                        | 169.66                       | 244.59                                  | 0.75                        | 0.69                         | 254.27                      | 131.90                       | 165.50                                  | 1.54                        | 0.80                         | A03        |
| dextrorphan-total <sup>†</sup> | AS=1.0        | 424.62                        | 402.80                       | 412.90                                  | 1.03                        | 0.98                         | 209.12                      | 227.79                       | 246.57                                  | 0.85                        | 0.92                         | A04        |
| dextrorphan-total <sup>†</sup> | AS=1.0        | 454.50                        | 424.97                       | 394.40                                  | 1.15                        | 1.08                         | 231.55                      | 248.29                       | 236.53                                  | 0.98                        | 1.05                         | A05        |
| dextrorphan-total <sup>†</sup> | AS=2.0        | 392.52                        | 374.71                       | 408.72                                  | 0.96                        | 0.92                         | 249.29                      | 213.58                       | 243.48                                  | 1.02                        | 0.88                         | A06        |
| dextrorphan-total <sup>†</sup> | AS=1.0        | 456.59                        | 450.25                       | 165.81                                  | 2.75                        | 2.72                         | 226.94                      | 240.80                       | 251.20                                  | 0.90                        | 0.96                         | A07        |
| dextrorphan-total <sup>†</sup> | AS=2.0        | 364.60                        | 362.66                       | 275.97                                  | 1.32                        | 1.31                         | 235.26                      | 205.83                       | 203.07                                  | 1.16                        | 1.01                         | A09        |
| dextrorphan-total <sup>†</sup> | AS=1.0        | 402.03                        | 385.18                       | 409.90                                  | 0.98                        | 0.94                         | 204.39                      | 218.86                       | 248.89                                  | 0.82                        | 0.88                         | A10        |
| dextrorphan-total <sup>†</sup> | AS=1.0        | 355.67                        | 351.09                       | 273.45                                  | 1.30                        | 1.28                         | 173.18                      | 188.07                       | 150.82                                  | 1.15                        | 1.25                         | A11        |
| dextrorphan-total <sup>†</sup> | AS=3.0        | 391.50                        | 385.54                       | 384.82                                  | 1.02                        | 1.00                         | 322.96                      | 241.70                       | 298.56                                  | 1.08                        | 0.81                         | A12        |
| dextrorphan-total <sup>†</sup> | AS=1.0        | 394.78                        | 382.08                       | 393.84                                  | 1.00                        | 0.97                         | 199.11                      | 213.38                       | 245.03                                  | 0.81                        | 0.87                         | A13        |
| dextrorphan-total <sup>†</sup> | AS=2.0        | 396.92                        | 376.71                       | 373.92                                  | 1.06                        | 1.01                         | 262.34                      | 220.25                       | 259.95                                  | 1.01                        | 0.85                         | A14        |

\*: no AUC<sub>last</sub> calculated due to insufficient amount of observed data points, -: not available, †: AUC<sub>last</sub> and C<sub>max</sub> values as well as corresponding ratios were calculated based on a small number of observed data points (n = 3 for studies A and B, n = 2 for studies D and E) and should be interpreted with caution, AS: CYP2D6 activity score, AUC: area under the plasma concentration-time curve, AUC<sub>last</sub>: AUC from the time of the first concentration measurement to the last time of concentration measurement, C<sub>max</sub>: peak plasma concentration, CYP2D6: Cytochrome P450 2D6, obs: observed, po: oral, ind.: individual, optim.: optimized, pred: predicted.

**Table S6.7.4:** Predicted and observed AUC<sub>last</sub> and C<sub>max</sub> values and geometric mean fold errors (continued)

| Molecule                       | CYP2D6 status | AUC <sub>last</sub> [ng·h/mL] |                              |         |                             |                              | C <sub>max</sub> [ng/mL]    |                              |        |                             |                              | Subject ID |
|--------------------------------|---------------|-------------------------------|------------------------------|---------|-----------------------------|------------------------------|-----------------------------|------------------------------|--------|-----------------------------|------------------------------|------------|
|                                |               | Pred                          |                              | Obs     | Pred/Obs                    |                              | Pred                        |                              | Obs    | Pred/Obs                    |                              |            |
|                                |               | population k <sub>cat</sub>   | ind. optim. k <sub>cat</sub> |         | population k <sub>cat</sub> | ind. optim. k <sub>cat</sub> | population k <sub>cat</sub> | ind. optim. k <sub>cat</sub> |        | population k <sub>cat</sub> | ind. optim. k <sub>cat</sub> |            |
| dextrorphan-total <sup>†</sup> | AS=3.0        | 412.59                        | 408.01                       | 282.20  | 1.46                        | 1.45                         | 314.56                      | 244.64                       | 189.69 | 1.66                        | 1.29                         | A15        |
| dextrorphan-total <sup>†</sup> | AS=1.0        | 217.90                        | 196.43                       | 197.95  | 1.10                        | 0.99                         | 195.69                      | 150.81                       | 135.38 | 1.45                        | 1.11                         | A16        |
| dextrorphan-total <sup>†</sup> | AS=2.0        | 401.27                        | 182.30                       | 227.89  | 1.76                        | 0.80                         | 262.48                      | 220.11                       | 249.92 | 1.05                        | 0.88                         | C01        |
| dextrorphan-total <sup>†</sup> | AS=2.0        | 424.15                        | 400.81                       | 658.17  | 0.64                        | 0.61                         | 288.64                      | 238.43                       | 332.02 | 0.87                        | 0.72                         | C02        |
| dextrorphan-total <sup>†</sup> | AS=2.0        | 390.84                        | 363.31                       | 409.76  | 0.95                        | 0.89                         | 289.88                      | 227.44                       | 429.82 | 0.67                        | 0.53                         | C03        |
| dextrorphan-total <sup>†</sup> | AS=2.0        | 373.50                        | 351.28                       | 249.66  | 1.50                        | 1.41                         | 236.62                      | 200.55                       | 207.19 | 1.14                        | 0.97                         | C04        |
| dextrorphan-total <sup>†</sup> | -             | 407.26                        | 407.26                       | 211.28  | 1.93                        | 1.93                         | 195.02                      | 195.02                       | 94.97  | 2.05                        | 2.05                         | C05        |
| dextrorphan-total <sup>†</sup> | AS=3.0        | 381.95                        | 376.42                       | 374.65  | 1.02                        | 1.00                         | 288.07                      | 225.95                       | 177.33 | 1.62                        | 1.27                         | C06        |
| dextrorphan-total <sup>†</sup> | -             | 401.92                        | 401.92                       | 369.49  | 1.09                        | 1.09                         | 196.93                      | 196.93                       | 207.71 | 0.95                        | 0.95                         | C07        |
| dextrorphan-total <sup>†</sup> | AS=0.5        | 298.66                        | 257.64                       | 361.64  | 0.83                        | 0.71                         | 123.96                      | 100.89                       | 161.12 | 0.77                        | 0.63                         | C08        |
| dextrorphan-total <sup>†</sup> | -             | 419.51                        | 419.51                       | 495.73  | 0.85                        | 0.85                         | 203.83                      | 203.83                       | 253.26 | 0.80                        | 0.80                         | C09        |
| dextrorphan-total <sup>†</sup> | AS=1.5        | 417.32                        | 421.64                       | 736.42  | 0.57                        | 0.57                         | 255.36                      | 235.39                       | 380.92 | 0.67                        | 0.62                         | C10        |
| dextrorphan-total <sup>†</sup> | AS=1.5        | 362.15                        | 331.47                       | 429.22  | 0.84                        | 0.77                         | 210.39                      | 193.95                       | 199.73 | 1.05                        | 0.97                         | C11        |
| dextrorphan-total <sup>†</sup> | AS=1.5        | 432.92                        | 408.08                       | 486.83  | 0.89                        | 0.84                         | 263.30                      | 243.68                       | 234.47 | 1.12                        | 1.04                         | C12        |
| dextrorphan-total <sup>†</sup> | -             | 427.02                        | 427.02                       | 444.12  | 0.96                        | 0.96                         | 208.64                      | 208.64                       | 237.05 | 0.88                        | 0.88                         | C13        |
| dextrorphan-total <sup>†</sup> | AS=1.5        | 384.85                        | 374.74                       | 459.39  | 0.84                        | 0.82                         | 221.79                      | 210.97                       | 246.57 | 0.90                        | 0.86                         | C14        |
| dextrorphan-total <sup>†</sup> | AS=1.0        | 453.27                        | 434.50                       | 501.42  | 0.90                        | 0.87                         | 220.11                      | 241.79                       | 247.34 | 0.89                        | 0.98                         | C15        |
| dextrorphan-total <sup>†</sup> | -             | 373.44                        | 373.44                       | 565.76  | 0.66                        | 0.66                         | 175.74                      | 175.74                       | 486.45 | 0.36                        | 0.36                         | C16        |
| dextrorphan-total <sup>†</sup> | AS=2.0        | 216.72                        | 222.34                       | 1118.88 | 0.19                        | 0.20                         | 322.59                      | 178.02                       | 715.52 | 0.45                        | 0.25                         | D01        |
| dextrorphan-total <sup>†</sup> | AS=1.5        | 215.92                        | 235.93                       | 643.82  | 0.34                        | 0.37                         | 243.57                      | 166.09                       | 409.23 | 0.60                        | 0.41                         | D02        |
| dextrorphan-total <sup>†</sup> | AS=2.0        | 206.22                        | 192.90                       | 916.72  | 0.22                        | 0.21                         | 253.66                      | 145.40                       | 604.84 | 0.42                        | 0.24                         | D03        |
| dextrorphan-total <sup>†</sup> | AS=2.0        | 210.91                        | 239.27                       | 843.28  | 0.25                        | 0.28                         | 263.27                      | 175.27                       | 514.76 | 0.51                        | 0.34                         | D04        |
| dextrorphan-total <sup>†</sup> | -             | 266.16                        | 266.16                       | 733.43  | 0.36                        | 0.36                         | 236.55                      | 236.55                       | 442.69 | 0.53                        | 0.53                         | D05        |
| dextrorphan-total <sup>†</sup> | AS=1.0        | *                             | *                            | *       | *                           | *                            | 232.19                      | 182.19                       | 584.25 | 0.40                        | 0.31                         | D06        |
| dextrorphan-total <sup>†</sup> | AS=2.0        | 206.70                        | 220.21                       | 1175.42 | 0.18                        | 0.19                         | 294.37                      | 174.40                       | 725.81 | 0.41                        | 0.24                         | D07        |
| dextrorphan-total <sup>†</sup> | AS=1.0        | 240.53                        | 242.27                       | 621.04  | 0.39                        | 0.39                         | 225.72                      | 166.26                       | 373.20 | 0.60                        | 0.45                         | D08        |
| dextrorphan-total <sup>†</sup> | AS=2.0        | 209.00                        | 197.10                       | 671.12  | 0.31                        | 0.29                         | 284.35                      | 153.37                       | 422.10 | 0.67                        | 0.36                         | D09        |
| dextrorphan-total <sup>†</sup> | AS=1.5        | 215.12                        | 211.81                       | 1132.72 | 0.19                        | 0.19                         | 247.51                      | 164.62                       | 656.32 | 0.38                        | 0.25                         | D10        |
| dextrorphan-total <sup>†</sup> | AS=1.0        | 250.64                        | 245.81                       | 997.96  | 0.25                        | 0.25                         | 230.56                      | 186.75                       | 615.14 | 0.37                        | 0.30                         | D11        |
| dextrorphan-total <sup>†</sup> | AS=1.0        | 222.69                        | 208.61                       | 1069.74 | 0.21                        | 0.20                         | 210.41                      | 161.69                       | 748.98 | 0.28                        | 0.22                         | D12        |
| dextrorphan-total <sup>†</sup> | AS=1.0        | 226.73                        | 233.80                       | 319.11  | 0.71                        | 0.73                         | 231.23                      | 178.23                       | 183.51 | 1.26                        | 0.97                         | E01        |
| dextrorphan-total <sup>†</sup> | AS=1.0        | 258.72                        | 257.99                       | 355.20  | 0.73                        | 0.73                         | 199.71                      | 181.42                       | 241.42 | 0.83                        | 0.75                         | E02        |
| dextrorphan-total <sup>†</sup> | AS=1.0        | 237.66                        | 225.35                       | 355.60  | 0.67                        | 0.63                         | 221.17                      | 174.50                       | 290.84 | 0.76                        | 0.60                         | E03        |
| dextrorphan-total <sup>†</sup> | AS=2.0        | 230.12                        | 224.43                       | 736.33  | 0.31                        | 0.30                         | 299.18                      | 173.57                       | 463.28 | 0.65                        | 0.37                         | E04        |

\*: no AUC<sub>last</sub> calculated due to insufficient amount of observed data points, -: not available, †: AUC<sub>last</sub> and C<sub>max</sub> values as well as corresponding ratios were calculated based on a small number of observed data points (n = 3 for studies A and B, n = 2 for studies D and E) and should be interpreted with caution, AS: CYP2D6 activity score, AUC: area under the plasma concentration-time curve, AUC<sub>last</sub>: AUC from the time of the first concentration measurement to the last time of concentration measurement, C<sub>max</sub>: peak plasma concentration, CYP2D6: Cytochrome P450 2D6, obs: observed, po: oral, ind.: individual, optim.: optimized, pred: predicted.

**Table S6.7.4:** Predicted and observed AUC<sub>last</sub> and C<sub>max</sub> values and geometric mean fold errors (continued)

| Molecule                               | CYP2D6 status | AUC <sub>last</sub> [ng·h/mL] |                              |         |                                            |                              | C <sub>max</sub> [ng/mL]    |                              |         |                                            |                              | Subject ID |
|----------------------------------------|---------------|-------------------------------|------------------------------|---------|--------------------------------------------|------------------------------|-----------------------------|------------------------------|---------|--------------------------------------------|------------------------------|------------|
|                                        |               | Pred                          |                              | Obs     | Pred/Obs                                   |                              | Pred                        |                              | Obs     | Pred/Obs                                   |                              |            |
|                                        |               | population k <sub>cat</sub>   | ind. optim. k <sub>cat</sub> |         | population k <sub>cat</sub>                | ind. optim. k <sub>cat</sub> | population k <sub>cat</sub> | ind. optim. k <sub>cat</sub> |         | population k <sub>cat</sub>                | ind. optim. k <sub>cat</sub> |            |
| dextrorphan-total <sup>†</sup>         | AS=2.0        | 183.00                        | 213.64                       | 657.99  | 0.28                                       | 0.32                         | 241.17                      | 149.52                       | 411.81  | 0.59                                       | 0.36                         | E05        |
| dextrorphan-total <sup>†</sup>         | AS=1.0        | 239.50                        | 243.56                       | 698.13  | 0.34                                       | 0.35                         | 225.90                      | 181.06                       | 401.51  | 0.56                                       | 0.45                         | E06        |
| dextrorphan-total <sup>†</sup>         | AS=2.0        | 226.27                        | 235.11                       | 889.13  | 0.25                                       | 0.26                         | 297.46                      | 180.96                       | 576.53  | 0.52                                       | 0.31                         | E07        |
| dextrorphan-total <sup>†</sup>         | AS=2.0        | 213.98                        | 256.04                       | 749.94  | 0.29                                       | 0.34                         | 284.10                      | 181.68                       | 442.69  | 0.64                                       | 0.41                         | E08        |
| dextrorphan-total <sup>†</sup>         | AS=2.0        | 267.65                        | 265.21                       | 1026.95 | 0.26                                       | 0.26                         | 346.78                      | 205.39                       | 599.70  | 0.58                                       | 0.34                         | E09        |
| dextrorphan-total <sup>†</sup>         | AS=1.0        | 227.56                        | 222.95                       | 858.04  | 0.27                                       | 0.26                         | 232.09                      | 146.24                       | 491.60  | 0.47                                       | 0.30                         | E10        |
| dextrorphan-total <sup>†</sup>         | AS=1.0        | 223.13                        | 216.46                       | 1138.83 | 0.20                                       | 0.19                         | 200.12                      | 163.28                       | 746.40  | 0.27                                       | 0.22                         | E11        |
| dextrorphan-total <sup>†</sup>         | AS=2.0        | 198.39                        | 221.73                       | 548.05  | 0.36                                       | 0.40                         | 287.50                      | 174.66                       | 373.20  | 0.77                                       | 0.47                         | E12        |
| dextrorphan-total <sup>†</sup>         | AS=2.0        | 220.02                        | 244.75                       | 942.32  | 0.23                                       | 0.26                         | 312.94                      | 192.70                       | 664.04  | 0.47                                       | 0.29                         | E13        |
| dextrorphan-total <sup>†</sup>         | AS=1.0        | 234.15                        | 232.37                       | 776.34  | 0.30                                       | 0.30                         | 218.61                      | 175.89                       | 545.65  | 0.40                                       | 0.32                         | E14        |
| dextrorphan-total <sup>†</sup>         | AS=2.0        | 228.09                        | 282.61                       | 1038.21 | 0.22                                       | 0.27                         | 344.89                      | 215.69                       | 661.47  | 0.52                                       | 0.33                         | E15        |
| dextrorphan-total <sup>†</sup>         | AS=1.0        | 278.20                        | 275.00                       | 962.07  | 0.29                                       | 0.29                         | 225.93                      | 198.00                       | 630.58  | 0.36                                       | 0.31                         | E16        |
| dextrorphan-total <sup>†</sup>         | AS=1.0        | 273.00                        | 252.19                       | 496.73  | 0.55                                       | 0.51                         | 278.85                      | 160.19                       | 306.28  | 0.91                                       | 0.52                         | E17        |
| dextrorphan-total <sup>†</sup>         | AS=2.0        | 211.63                        | 249.18                       | 405.37  | 0.52                                       | 0.61                         | 304.65                      | 191.00                       | 452.99  | 0.67                                       | 0.42                         | E18        |
| dextrorphan-total <sup>†</sup>         | AS=2.0        | 199.98                        | 243.32                       | 1614.43 | 0.12                                       | 0.15                         | 280.19                      | 179.57                       | 1091.29 | 0.26                                       | 0.16                         | E20        |
| dextrorphan-total <sup>†</sup>         | AS=1.0        | 299.53                        | 178.71                       | 161.92  | 1.85                                       | 1.10                         | 288.46                      | 102.34                       | 166.78  | 1.73                                       | 0.61                         | E21        |
| dextrorphan-total <sup>†</sup>         | AS=3.0        | 257.95                        | 263.62                       | 677.83  | 0.38                                       | 0.39                         | 352.78                      | 201.86                       | 710.37  | 0.50                                       | 0.28                         | E23        |
| dextrorphan-total <sup>†</sup>         | AS=2.0        | 194.69                        | 231.92                       | 994.10  | 0.20                                       | 0.23                         | 280.43                      | 177.47                       | 674.34  | 0.42                                       | 0.26                         | E24        |
| dextrorphan-total <sup>†</sup>         | AS=2.0        | 277.88                        | 264.65                       | 1646.27 | 0.17                                       | 0.16                         | 313.71                      | 195.66                       | 1263.74 | 0.25                                       | 0.15                         | E25        |
| dextrorphan-total <sup>†</sup>         | AS=1.0        | 260.20                        | 256.00                       | 1015.63 | 0.26                                       | 0.25                         | 216.48                      | 187.46                       | 666.61  | 0.32                                       | 0.28                         | E26        |
| dextrorphan-total <sup>†</sup>         | AS=2.0        | 198.01                        | 187.34                       | 1035.70 | 0.19                                       | 0.18                         | 284.61                      | 147.60                       | 664.04  | 0.43                                       | 0.22                         | E27        |
| dextrorphan-total <sup>†</sup>         | AS=1.0        | 266.46                        | 246.65                       | 787.91  | 0.34                                       | 0.31                         | 229.73                      | 187.15                       | 540.50  | 0.43                                       | 0.35                         | E28        |
| dextrorphan-total <sup>†</sup>         | AS=1.0        | 258.77                        | 249.21                       | 930.94  | 0.28                                       | 0.27                         | 240.65                      | 191.07                       | 568.81  | 0.42                                       | 0.34                         | E30        |
| GMFE (dextrorphan-total <sup>†</sup> ) |               | population k <sub>cat</sub>   |                              |         | 2.63 (1.00–8.33)<br>35/69 with GMFE ≤ 2    |                              |                             |                              |         | 1.84 (1.01–5.26)<br>48/70 with GMFE ≤ 2    |                              |            |
|                                        |               | ind. optim. k <sub>cat</sub>  |                              |         | 2.58 (1.00–6.67)<br>35/69 with GMFE ≤ 2    |                              |                             |                              |         | 2.41 (1.01–6.67)<br>34/70 with GMFE ≤ 2    |                              |            |
| Overall GMFE                           |               | population k <sub>cat</sub>   |                              |         | 2.45 (1.00–14.70)<br>131/210 with GMFE ≤ 2 |                              |                             |                              |         | 2.21 (1.00–20.00)<br>133/212 with GMFE ≤ 2 |                              |            |

\*: no AUC<sub>last</sub> calculated due to insufficient amount of observed data points, -: not available, †: AUC<sub>last</sub> and C<sub>max</sub> values as well as corresponding ratios were calculated based on a small number of observed data points (n = 3 for studies A and B, n = 2 for studies D and E) and should be interpreted with caution, AS: CYP2D6 activity score, AUC: area under the plasma concentration-time curve, AUC<sub>last</sub>: AUC from the time of the first concentration measurement to the last time of concentration measurement, C<sub>max</sub>: peak plasma concentration, CYP2D6: Cytochrome P450 2D6, obs: observed, po: oral, ind.: individual, optim.: optimized, pred: predicted.

**Table S6.7.4:** Predicted and observed AUC<sub>last</sub> and C<sub>max</sub> values and geometric mean fold errors (continued)

| Molecule | CYP2D6 status | AUC <sub>last</sub> [ng·h/mL] |                              |     |                             |                                            | C <sub>max</sub> [ng/mL]    |                              |     |                             |                                           | Subject ID |
|----------|---------------|-------------------------------|------------------------------|-----|-----------------------------|--------------------------------------------|-----------------------------|------------------------------|-----|-----------------------------|-------------------------------------------|------------|
|          |               | Pred                          |                              | Obs | Pred/Obs                    |                                            | Pred                        |                              | Obs | Pred/Obs                    |                                           |            |
|          |               | population k <sub>cat</sub>   | ind. optim. k <sub>cat</sub> |     | population k <sub>cat</sub> | ind. optim. k <sub>cat</sub>               | population k <sub>cat</sub> | ind. optim. k <sub>cat</sub> |     | population k <sub>cat</sub> | ind. optim. k <sub>cat</sub>              |            |
|          |               |                               | ind. optim. k <sub>cat</sub> |     |                             | 1.94 (1.00–14.70)<br>166/210 with GMFE ≤ 2 |                             |                              |     |                             | 1.94 (1.00–8.53)<br>152/212 with GMFE ≤ 2 |            |

\*: no AUC<sub>last</sub> calculated due to insufficient amount of observed data points, -: not available, †: AUC<sub>last</sub> and C<sub>max</sub> values as well as corresponding ratios were calculated based on a small number of observed data points (n = 3 for studies A and B, n = 2 for studies D and E) and should be interpreted with caution, AS: CYP2D6 activity score, AUC: area under the plasma concentration-time curve, AUC<sub>last</sub>: AUC from the time of the first concentration measurement to the last time of concentration measurement, C<sub>max</sub>: peak plasma concentration, CYP2D6: Cytochrome P450 2D6, obs: observed, po: oral, ind.: individual, optim.: optimized, pred: predicted.

## S6.8 GMFE of Predicted AUC<sub>last</sub> and C<sub>max</sub> Values Grouped by Study and Activity Score

**Table S6.8.5:** Predicted and observed AUC<sub>last</sub> and C<sub>max</sub> values and geometric mean fold errors grouped by study and activity score

| Study                           | Molecule                       | CYP2D6<br>Activity<br>Score | n | AUC <sub>last</sub> [ng·h/mL] |                              |                 |                             |                              |                             | C <sub>max</sub> [ng/mL]     |                |                             |                              |  |  |
|---------------------------------|--------------------------------|-----------------------------|---|-------------------------------|------------------------------|-----------------|-----------------------------|------------------------------|-----------------------------|------------------------------|----------------|-----------------------------|------------------------------|--|--|
|                                 |                                |                             |   | Pred                          |                              | Obs             | Pred/Obs                    |                              | Pred                        |                              | Obs            | Pred/Obs                    |                              |  |  |
|                                 |                                |                             |   | population k <sub>cat</sub>   | ind. optim. k <sub>cat</sub> |                 | population k <sub>cat</sub> | ind. optim. k <sub>cat</sub> | population k <sub>cat</sub> | ind. optim. k <sub>cat</sub> |                | population k <sub>cat</sub> | ind. optim. k <sub>cat</sub> |  |  |
| A                               | dextromethorphan               | 0                           | 1 | 156.79                        | 146.08                       | 162.42          | 0.97                        | 0.9                          | 15.85                       | 14.08                        | 16.37          | 0.97                        | 0.86                         |  |  |
|                                 |                                | 0.25                        | 1 | 131.51                        | 138.87                       | 146.34          | 0.90                        | 0.95                         | 14.33                       | 11.92                        | 12.59          | 0.83                        | 0.88                         |  |  |
|                                 |                                | 1                           | 7 | 13.15 (0.99)                  | 6.32 (1.37)                  | 5.68 (1.50)     | 2.44 (0.59)                 | 1.12 (0.08)                  | 1.02 (0.32)                 | 2.07 (0.23)                  | 0.95 (0.23)    | 2.13 (0.41)                 | 0.96 (0.18)                  |  |  |
|                                 |                                | 1.5                         | 1 | 7.84                          | 14.67                        | 17.31           | 0.45                        | 0.85                         | 4.53                        | 1.30                         | 2.07           | 0.29                        | 0.46                         |  |  |
|                                 |                                | 2                           | 3 | 1.34 (0.40)                   | 0.79 (0.70)                  | 0.64 (0.53)     | 2.74 (1.16)                 | 1.22 (0.06)                  | 0.25 (0.19)                 | 0.55 (0.03)                  | 0.24 (0.16)    | 3.36 (2.45)                 | 1.01 (0.15)                  |  |  |
|                                 |                                | 3                           | 2 | 0.54 (0.24)                   | 0.40 (0.22)                  | 0.39 (0.15)     | 1.37 (0.11)                 | 1 (0.17)                     | 0.17 (0.01)                 | 0.26 (0.03)                  | 0.17 (0.03)    | 1.55 (0.05)                 | 1.02 (0.12)                  |  |  |
| GMFE dextromethorphan, study A  |                                |                             |   |                               |                              | 2.16            | 1.13                        |                              |                             |                              | 2.32           | 1.17                        |                              |  |  |
| A                               | dextrorphan                    | 0.25                        | 1 | 3.80                          | 3.05                         | 3.20            | 1.19                        | 0.95                         | 0.38                        | 0.34                         | 0.27           | 0.90                        | 0.71                         |  |  |
|                                 |                                | 1                           | 7 | 13.67 (1.31)                  | 13.97 (1.27)                 | 19.62 (3.44)    | 0.71 (0.12)                 | 0.73 (0.12)                  | 5.11 (1.88)                 | 2.52 (0.3)                   | 2.92 (0.39)    | 0.54 (0.18)                 | 0.62 (0.20)                  |  |  |
|                                 |                                | 1.5                         | 1 | 15.45                         | 15.23                        | 23.58           | 0.66                        | 0.65                         | 6.20                        | 3.59                         | 2.73           | 0.58                        | 0.44                         |  |  |
|                                 |                                | 2                           | 4 | 14.09 (0.75)                  | 14.05 (0.75)                 | 19.05 (5.09)    | 0.78 (0.2)                  | 0.78 (0.2)                   | 5.63 (1.37)                 | 3.2 (0.18)                   | 3.33 (0.26)    | 0.6 (0.18)                  | 0.63 (0.19)                  |  |  |
|                                 |                                | 3                           | 2 | 14.57 (3.25)                  | 14.5 (3.29)                  | 18.26 (7.09)    | 0.9 (0.53)                  | 0.9 (0.53)                   | 3.85 (0.53)                 | 4.25 (0.06)                  | 4.24 (0.05)    | 1.12 (0.17)                 | 1.11 (0.17)                  |  |  |
| GMFE dextrorphan, study A       |                                |                             |   |                               |                              | 1.33            | 1.31                        |                              |                             |                              | 1.64           | 1.57                        |                              |  |  |
| A                               | dextrorphan-total <sup>†</sup> | 0.25                        | 1 | 74.20                         | 58.21                        | 161.67          | 0.46                        | 0.36                         | 150.57                      | 29.23                        | 23.13          | 0.19                        | 0.15                         |  |  |
|                                 |                                | 1                           | 7 | 386.58 (82.34)                | 370.4 (83.06)                | 321.18 (106.87) | 1.33 (0.64)                 | 1.28 (0.64)                  | 216.35 (50.44)              | 205.71 (19.72)               | 212.57 (33.57) | 0.99 (0.23)                 | 1.01 (0.14)                  |  |  |
|                                 |                                | 1.5                         | 1 | 454.99                        | 475.88                       | 601.15          | 0.76                        | 0.79                         | 357.76                      | 279.59                       | 240.73         | 0.78                        | 0.67                         |  |  |
|                                 |                                | 2                           | 4 | 334.27 (101.83)               | 320.94 (101.04)              | 325.8 (78.04)   | 1.02 (0.24)                 | 0.98 (0.26)                  | 218 (42.38)                 | 250.29 (11.37)               | 192.89 (41.08) | 1.18 (0.25)                 | 0.88 (0.09)                  |  |  |
|                                 |                                | 3                           | 2 | 402.05 (14.91)                | 396.78 (15.89)               | 333.51 (72.56)  | 1.24 (0.31)                 | 1.22 (0.31)                  | 244.12 (76.98)              | 318.76 (5.94)                | 243.17 (2.08)  | 1.37 (0.41)                 | 1.05 (0.34)                  |  |  |
| GMFE dextrorphan-total, study A |                                |                             |   |                               |                              | 1.29            | 1.30                        |                              |                             |                              | 1.40           | 1.44                        |                              |  |  |
| Overall GMFE, study A           |                                |                             |   |                               |                              | 1.59            | 1.24                        |                              |                             |                              | 1.80           | 1.31                        |                              |  |  |
| C                               | dextromethorphan               | 0.5                         | 1 | 49.56                         | 63.17                        | 62.68           | 0.79                        | 1.01                         | 10.39                       | 6.45                         | 7.53           | 0.62                        | 0.72                         |  |  |
|                                 |                                | 1                           | 1 | 14.86                         | 6.01                         | 5.05            | 2.94                        | 1.19                         | 1.09                        | 2.53                         | 1.03           | 2.33                        | 0.95                         |  |  |
|                                 |                                | 1.5                         | 4 | 6.23 (0.87)                   | 4.33 (2.75)                  | 3.49 (2.31)     | 2.49 (1.62)                 | 1.26 (0.04)                  | 0.82 (0.67)                 | 1.11 (0.14)                  | 0.71 (0.48)    | 2.23 (1.76)                 | 0.94 (0.13)                  |  |  |
|                                 |                                | 2                           | 4 | 1.68 (0.30)                   | 0.50 (0.19)                  | 0.45 (0.16)     | 3.99 (1.00)                 | 1.11 (0.08)                  | 0.2 (0.07)                  | 0.58 (0.05)                  | 0.15 (0.05)    | 3.19 (0.97)                 | 0.78 (0.18)                  |  |  |
|                                 |                                | 3                           | 1 | 0.13                          | 0.08                         | 0.07            | 1.79                        | 1.15                         | 0.11                        | 0.21                         | 0.13           | 1.93                        | 1.18                         |  |  |
| GMFE dextromethorphan, study C  |                                |                             |   |                               |                              | 2.90            | 1.17                        |                              |                             |                              | 2.50           | 1.18                        |                              |  |  |
| C                               | dextrorphan                    | 0.5                         | 1 | 10.52                         | 9.41                         | 12.19           | 0.86                        | 0.77                         | 4.14                        | 1.48                         | 1.20           | 0.36                        | 0.29                         |  |  |
|                                 |                                | 1                           | 1 | 14.89                         | 15.25                        | 24.67           | 0.6                         | 0.62                         | 8.85                        | 2.85                         | 3.44           | 0.32                        | 0.39                         |  |  |
|                                 |                                | 1.5                         | 4 | 13.07 (1.47)                  | 13.08 (1.44)                 | 15.32 (5.82)    | 1.01 (0.61)                 | 1.02 (0.61)                  | 4.37 (2.57)                 | 2.97 (0.43)                  | 3.11 (0.36)    | 1.06 (1.02)                 | 1.14 (1.12)                  |  |  |
|                                 |                                | 2                           | 4 | 14.23 (1.32)                  | 14.13 (1.27)                 | 10.04 (1.53)    | 1.43 (0.1)                  | 1.42 (0.1)                   | 3.92 (1.11)                 | 3.48 (0.42)                  | 3.66 (0.43)    | 0.94 (0.26)                 | 0.99 (0.27)                  |  |  |
|                                 |                                | 3                           | 1 | 13.53                         | 13.49                        | 10.29           | 1.31                        | 1.31                         | 4.63                        | 3.61                         | 3.61           | 0.78                        | 0.78                         |  |  |

All values are given as mean (SD). <sup>†</sup>: AUC<sub>last</sub> and C<sub>max</sub> values as well as corresponding ratios were calculated based on a small number of observed data points (n = 3 for studies A and B, n = 3 for studies D and E) and should be interpreted with caution, AUC: area under the plasma concentration-time curve, AUC<sub>last</sub>: AUC from the time of the first concentration measurement to the last time of concentration measurement, C<sub>max</sub>: peak plasma concentration, CYP2D6: Cytochrome P450 2D6 obs.: observed, po.: oral, ind.: individual, optim.: optimized, pred.: predicted.

**Table S6.8.5:** Predicted and observed AUC<sub>last</sub> and C<sub>max</sub> values and geometric mean fold errors (continued)

| Study                           | Molecule                       | CYP2D6<br>Activity<br>Score | n  | AUC <sub>last</sub> [ng·h/mL] |                              |                 |                             |                              | C <sub>max</sub> [ng/mL]    |                              |                |                             |                              |
|---------------------------------|--------------------------------|-----------------------------|----|-------------------------------|------------------------------|-----------------|-----------------------------|------------------------------|-----------------------------|------------------------------|----------------|-----------------------------|------------------------------|
|                                 |                                |                             |    | Pred                          |                              | Obs             | Pred/Obs                    |                              | Pred                        |                              | Obs            | Pred/Obs                    |                              |
|                                 |                                |                             |    | population k <sub>cat</sub>   | ind. optim. k <sub>cat</sub> |                 | population k <sub>cat</sub> | ind. optim. k <sub>cat</sub> | population k <sub>cat</sub> | ind. optim. k <sub>cat</sub> |                | population k <sub>cat</sub> | ind. optim. k <sub>cat</sub> |
| GMFE dextrorphan, study C       |                                |                             |    |                               |                              |                 | 1.26                        | 1.27                         |                             |                              |                | 1.43                        | 1.45                         |
| C                               | dextrorphan-total <sup>†</sup> | 0.5                         | 1  | 298.66                        | 257.64                       | 361.64          | 0.83                        | 0.71                         | 161.12                      | 123.96                       | 100.89         | 0.77                        | 0.63                         |
|                                 |                                | 1                           | 1  | 453.27                        | 434.5                        | 501.42          | 0.9                         | 0.87                         | 247.34                      | 220.11                       | 241.79         | 0.89                        | 0.98                         |
|                                 |                                | 1.5                         | 4  | 399.31 (31.86)                | 383.98 (40.17)               | 527.97 (140.95) | 0.78 (0.15)                 | 0.75 (0.12)                  | 265.42 (79.52)              | 237.71 (25.6)                | 221 (22.76)    | 0.94 (0.20)                 | 0.87 (0.18)                  |
|                                 |                                | 2                           | 4  | 345.18 (104.11)               | 324.43 (97.07)               | 386.37 (198.52) | 0.98 (0.36)                 | 0.93 (0.34)                  | 304.74 (98.17)              | 269.41 (25.24)               | 221.63 (15.94) | 0.93 (0.21)                 | 0.77 (0.19)                  |
|                                 |                                | 3                           | 1  | 381.95                        | 376.42                       | 374.65          | 1.02                        | 1.00                         | 177.33                      | 288.07                       | 225.95         | 1.62                        | 1.27                         |
| GMFE dextrorphan-total, study C |                                |                             |    |                               |                              |                 | 1.14                        | 1.20                         |                             |                              |                | 1.15                        | 1.24                         |
| Overall GMFE, study C           |                                |                             |    |                               |                              |                 | 1.77                        | 1.21                         |                             |                              |                | 1.69                        | 1.29                         |
| D                               | dextromethorphan               | 1                           | 4  | 13.15 (0.44)                  | 13.44 (10.27)                | 14.60 (15.26)   | 1.57 (0.90)                 | 1.09 (0.23)                  | 2.42 (1.91)                 | 2.26 (0.10)                  | 2.12 (1.49)    | 1.35 (0.74)                 | 0.93 (0.16)                  |
|                                 |                                | 1.5                         | 2  | 6.97 (0.10)                   | 14.11 (11.25)                | 16.43 (16.21)   | 0.82 (0.80)                 | 1.02 (0.32)                  | 3.34 (3.03)                 | 1.24 (0.02)                  | 2.26 (1.7)     | 0.63 (0.57)                 | 0.76 (0.18)                  |
|                                 |                                | 2                           | 5  | 2.70 (1.50)                   | 4.92 (5.63)                  | 4.25 (5.15)     | 1.99 (1.86)                 | 1.15 (0.12)                  | 0.8 (0.79)                  | 0.6 (0.07)                   | 0.87 (0.88)    | 1.8 (1.78)                  | 1.04 (0.11)                  |
| GMFE dextromethorphan, study D  |                                |                             |    |                               |                              |                 | 1.70                        | 1.11                         |                             |                              |                | 1.60                        | 1.10                         |
| D                               | dextrorphan                    | 1                           | 4  | 13.98 (0.44)                  | 13.89 (0.58)                 | 16.64 (4.42)    | 0.88 (0.23)                 | 0.88 (0.22)                  | 4.54 (0.66)                 | 2.82 (0.08)                  | 2.78 (0.43)    | 0.63 (0.10)                 | 0.62 (0.09)                  |
|                                 |                                | 1.5                         | 2  | 13.67 (0.50)                  | 13.50 (0.76)                 | 39.71 (15.84)   | 0.38 (0.16)                 | 0.37 (0.17)                  | 9.48 (2.75)                 | 3.19 (0.03)                  | 2.74 (0.64)    | 0.35 (0.10)                 | 0.31 (0.16)                  |
|                                 |                                | 2                           | 5  | 14.40 (1.39)                  | 14.34 (1.33)                 | 12.89 (8.11)    | 1.63 (1.21)                 | 1.63 (1.21)                  | 3.93 (1.54)                 | 3.72 (0.35)                  | 3.43 (0.52)    | 1.18 (0.77)                 | 1.13 (0.87)                  |
| GMFE dextrorphan, study D       |                                |                             |    |                               |                              |                 | 1.64                        | 1.64                         |                             |                              |                | 1.63                        | 1.69                         |
| D                               | dextrorphan-total <sup>†</sup> | 1                           | 3  | 237.95 (14.15)                | 232.23 (20.53)               | 896.25 (241.03) | 0.28 (0.09)                 | 0.28 (0.10)                  | 580.39 (155.53)             | 224.72 (9.93)                | 174.22 (12.12) | 0.41 (0.14)                 | 0.32 (0.09)                  |
|                                 |                                | 1.5                         | 2  | 215.52 (0.56)                 | 223.87 (17.05)               | 888.27 (345.7)  | 0.26 (0.1)                  | 0.28 (0.13)                  | 532.78 (174.72)             | 245.54 (2.79)                | 165.35 (1.04)  | 0.49 (0.15)                 | 0.33 (0.11)                  |
|                                 |                                | 2                           | 5  | 209.91 (4.25)                 | 214.36 (19.22)               | 945.08 (205.84) | 0.23 (0.05)                 | 0.23 (0.05)                  | 596.61 (130.43)             | 283.65 (27.14)               | 165.29 (14.85) | 0.49 (0.11)                 | 0.29 (0.06)                  |
| GMFE dextrorphan-total, study D |                                |                             |    |                               |                              |                 | 3.99                        | 3.93                         |                             |                              |                | 2.17                        | 3.28                         |
| Overall GMFE, study D           |                                |                             |    |                               |                              |                 | 2.39                        | 2.17                         |                             |                              |                | 1.80                        | 2.02                         |
| E                               | dextromethorphan               | 0                           | 1  | 124.38                        | 98.69                        | 97.59           | 1.27                        | 1.01                         | 10.67                       | 15.8                         | 10.94          | 1.48                        | 1.03                         |
|                                 |                                | 1                           | 13 | 13.05 (1.58)                  | 23.99 (29.30)                | 36.4 (57.39)    | 1.2 (0.74)                  | 1.02 (0.29)                  | 4.87 (6.97)                 | 2.2 (0.32)                   | 3.29 (3.43)    | 1.21 (0.78)                 | 0.99 (0.32)                  |
|                                 |                                | 2                           | 13 | 3.46 (0.48)                   | 9.31 (6.53)                  | 8.73 (6.96)     | 0.88 (0.84)                 | 1.16 (0.20)                  | 2.48 (3.61)                 | 0.58 (0.05)                  | 1.55 (1.08)    | 0.83 (0.9)                  | 1.01 (0.45)                  |
|                                 |                                | 3                           | 1  | 1.97                          | 2.79                         | 2.30            | 0.85                        | 1.21                         | 0.35                        | 0.24                         | 0.39           | 0.67                        | 1.10                         |
| GMFE dextromethorphan, study E  |                                |                             |    |                               |                              |                 | 1.18                        | 1.09                         |                             |                              |                | 1.23                        | 1.02                         |
| E                               | dextrorphan                    | 1                           | 13 | 13.67 (2.44)                  | 12.84 (1.86)                 | 15.74 (5.92)    | 1.21 (1.33)                 | 1.02 (0.74)                  | 3.74 (1.67)                 | 2.83 (0.5)                   | 2.41 (0.51)    | 1.18 (1.53)                 | 0.79 (0.44)                  |
|                                 |                                | 2                           | 13 | 14.13 (2.32)                  | 14.11 (2.09)                 | 18.48 (8.75)    | 0.92 (0.38)                 | 0.92 (0.38)                  | 4.97 (2.05)                 | 3.8 (0.43)                   | 3.19 (0.67)    | 0.89 (0.36)                 | 0.76 (0.37)                  |

All values are given as mean (SD). <sup>†</sup>: AUC<sub>last</sub> and C<sub>max</sub> values as well as corresponding ratios were calculated based on a small number of observed data points (n = 3 for studies A and B, n = 3 for studies D and E) and should be interpreted with caution, AUC: area under the plasma concentration-time curve, AUC<sub>last</sub>: AUC from the time of the first concentration measurement to the last time of concentration measurement, C<sub>max</sub>: peak plasma concentration, CYP2D6: Cytochrome P450 2D6 obs: observed, po: oral, ind.: individual, optim.: optimized, pred: predicted.

**Table S6.8.5:** Predicted and observed AUC<sub>last</sub> and C<sub>max</sub> values and geometric mean fold errors (continued)

| Study                           | Molecule                       | CYP2D6<br>Activity<br>Score | n  | AUC <sub>last</sub> [ng·h/mL] |                              |                 |                             |                              | C <sub>max</sub> [ng/mL]    |                              |                |                             |                              |      |
|---------------------------------|--------------------------------|-----------------------------|----|-------------------------------|------------------------------|-----------------|-----------------------------|------------------------------|-----------------------------|------------------------------|----------------|-----------------------------|------------------------------|------|
|                                 |                                |                             |    | Pred                          |                              | Obs             | Pred/Obs                    |                              | Pred                        |                              | Obs            | Pred/Obs                    |                              |      |
|                                 |                                |                             |    | population k <sub>cat</sub>   | ind. optim. k <sub>cat</sub> |                 | population k <sub>cat</sub> | ind. optim. k <sub>cat</sub> | population k <sub>cat</sub> | ind. optim. k <sub>cat</sub> |                | population k <sub>cat</sub> | ind. optim. k <sub>cat</sub> |      |
|                                 |                                |                             | 3  | 1                             | 16.36                        | 16.40           | 18.37                       | 0.89                         | 0.89                        | 5.02                         | 4.32           | 4.24                        | 0.86                         | 0.84 |
| GMFE dextrorphan, study E       |                                |                             |    |                               |                              |                 |                             | 1.15                         | 1.06                        |                              |                | 1.56                        | 1.29                         |      |
| E                               | dextrorphan-total <sup>†</sup> | 1                           | 13 | 252.59 (23.27)                | 237.71 (24.05)               | 681.27 (311.13) | 0.52 (0.44)                 | 0.46 (0.27)                  | 444.65 (192.2)              | 231.46 (26.03)               | 171.3 (24.94)  | 0.67 (0.43)                 | 0.46 (0.22)                  |      |
|                                 |                                | 2                           | 13 | 219.21 (27.82)                | 239.99 (25.11)               | 944.98 (363.07) | 0.26 (0.10)                 | 0.29 (0.12)                  | 641.47 (262.92)             | 298.28 (28.04)               | 181.96 (19.27) | 0.52 (0.16)                 | 0.32 (0.1)                   |      |
|                                 |                                | 3                           | 1  | 257.95                        | 263.62                       | 677.83          | 0.38                        | 0.39                         | 710.37                      | 352.78                       | 201.86         | 0.50                        | 0.28                         |      |
| GMFE dextrorphan-total, study E |                                |                             |    |                               |                              |                 |                             | 2.86                         | 2.81                        |                              |                | 1.72                        | 2.69                         |      |
| Overall GMFE, study E           |                                |                             |    |                               |                              |                 |                             | 1.72                         | 1.65                        |                              |                | 1.36                        | 1.66                         |      |

All values are given as mean (SD). <sup>†</sup>: AUC<sub>last</sub> and C<sub>max</sub> values as well as corresponding ratios were calculated based on a small number of observed data points (n = 3 for studies A and B, n = 3 for studies D and E) and should be interpreted with caution, AUC: area under the plasma concentration-time curve, AUC<sub>last</sub>: AUC from the time of the first concentration measurement to the last time of concentration measurement, C<sub>max</sub>: peak plasma concentration, CYP2D6: Cytochrome P450 2D6 obs: observed, po: oral, ind.: individual, optim.: optimized, pred: predicted.

## S7 Summary

In this supplementary file, the development process of a whole-body PBPK model of dextromethorphan and its metabolites dextrorphan and dextrorphan *O*-glucuronide is documented. The model has been thoroughly evaluated to predict the pharmacokinetics of the modeled analytes including a wide range of CYP2D6 DGI scenarios. Moreover, the model was applied to predict individual plasma concentration-time profiles using the model  $k_{cat}$  values obtained during the DGI model building process. These were then compared to predictions using individual optimized  $k_{cat}$  values. For a tabular summary of model geometric mean fold error (GMFE) and mean relative deviation (MRD) values, refer to Table S7.0.1.

**Table S7.0.1:** Summary of quantitative performance metrics for the different model subsets

|                              | AUC <sub>last</sub> |          | C <sub>max</sub>  |          | MRD (range)       | MRD ≤ 2 |
|------------------------------|---------------------|----------|-------------------|----------|-------------------|---------|
|                              | GMFE (range)        | GMFE ≤ 2 | GMFE (range)      | GMFE ≤ 2 |                   |         |
| <b>Population studies</b>    |                     |          |                   |          |                   |         |
| PBPK base model              | 1.57 (1.01–3.45)    | 18/23    | 1.61 (1.01–2.97)  | 17/22    | 2.21 (1.35–3.56)  | 12/23   |
| DGI model                    | 1.50 (1.05–2.33)    | 16/18    | 1.28 (1.01–2.22)  | 17/18    | 2.13 (1.10–4.26)  | 11/18   |
| <b>Overall (populations)</b> | 1.54 (1.01–3.45)    | 34/41    | 1.47 (1.01–2.97)  | 34/40    | 2.17 (1.10–4.26)  | 23/41   |
| <b>Individual profiles</b>   |                     |          |                   |          |                   |         |
| Population predictions       | 2.45 (1.00–14.70)   | 131/210  | 2.21 (1.00–20.00) | 133/212  | 2.72 (1.08–14.00) | 114/212 |
| Individual predictions       | 1.94 (1.00–14.70)   | 166/210  | 1.94 (1.00–8.53)  | 152/212  | 1.94 (1.08–14.00) | 152/212 |

AUC<sub>last</sub>: AUC from the time of the first concentration measurement to the last time point of concentration measurement,  
 C<sub>max</sub>: peak plasma concentration, DGI: drug-gene interaction, GMFE: geometric mean fold error,  
 MRD: mean relative deviation, PBPK: physiologically based pharmacokinetic.



## S8 Abbreviations

|                           |                                                                                                              |
|---------------------------|--------------------------------------------------------------------------------------------------------------|
| <b>AS</b>                 | CYP2D6 activity score                                                                                        |
| <b>AUC</b>                | Area under the plasma concentration-time curve                                                               |
| <b>AUC<sub>last</sub></b> | AUC from the time of the first concentration measurement to the last time point of concentration measurement |
| <b>cap</b>                | Capsule                                                                                                      |
| <b>C<sub>max</sub></b>    | Peak plasma concentration                                                                                    |
| <b>CYP2D6</b>             | Cytochrome P450 2D6                                                                                          |
| <b>CYP3A4</b>             | Cytochrome P450 3A4                                                                                          |
| <b>DGI</b>                | Drug-gene interaction                                                                                        |
| <b>EHC</b>                | Enterohepatic circulation                                                                                    |
| <b>EM</b>                 | Extensive metabolizer                                                                                        |
| <b>f<sub>u</sub></b>      | Fraction unbound                                                                                             |
| <b>GFR</b>                | Glomerular filtration rate                                                                                   |
| <b>GMFE</b>               | Geometric mean fold error                                                                                    |
| <b>ICRP</b>               | International Commission on Radiological Protection                                                          |
| <b>IM</b>                 | Intermediate metabolizer                                                                                     |
| <b>inf</b>                | Infusion                                                                                                     |
| <b>iv</b>                 | Intravenous                                                                                                  |
| <b>K<sub>D</sub></b>      | Dissociation constant                                                                                        |
| <b>k<sub>cat</sub></b>    | Catalytic rate constant                                                                                      |
| <b>K<sub>M</sub></b>      | Michaelis-Menten constant                                                                                    |
| <b>k<sub>off</sub></b>    | Dissociation rate constant                                                                                   |
| <b>MRD</b>                | Mean relative deviation                                                                                      |
| <b>MW</b>                 | Molecular weight                                                                                             |
| <b>NHANES</b>             | Third National Health and Nutrition Examination Survey                                                       |
| <b>NM</b>                 | Normal metabolizer                                                                                           |
| <b>PBPK</b>               | Physiologically based pharmacokinetic                                                                        |
| <b>pKa</b>                | Acid dissociation constant                                                                                   |
| <b>PM</b>                 | Poor metabolizer                                                                                             |
| <b>po</b>                 | Oral                                                                                                         |
| <b>sd</b>                 | Single dose                                                                                                  |
| <b>sol</b>                | Oral solution                                                                                                |
| <b>tab</b>                | Tablet                                                                                                       |
| <b>t<sub>max</sub></b>    | Time to reach Peak plasma concentration                                                                      |
| <b>UM</b>                 | Ultrarapid metabolizer                                                                                       |
| <b>UGT2B15</b>            | Uridine 5'-diphospho-glucuronosyltransferase family 2 member B15                                             |

# Bibliography

1. Armani, S. *et al.* Drug Interaction Potential of Osilodrostat (LCI699) Based on Its Effect on the Pharmacokinetics of Probe Drugs of Cytochrome P450 Enzymes in Healthy Adults. *Clinical drug investigation* **37**, 465–472 (May 2017).
2. Benet, L. Z., Broccatelli, F. & Oprea, T. I. BDDCS Applied to Over 900 Drugs. *The AAPS Journal* **13**, 519–547 (Dec. 2011).
3. Berezhkovskiy, L. M. Volume of distribution at steady state for a linear pharmacokinetic system with peripheral elimination. *Journal of Pharmaceutical Sciences* **93**, 1628–1640 (2004).
4. Bolger, M. B., Macwan, J. S., Sarfraz, M., Almukainzi, M. & Löbenberg, R. The Irrelevance of In Vitro Dissolution in Setting Product Specifications for Drugs Like Dextromethorphan That are Subject to Lysosomal Trapping. *Journal of Pharmaceutical Sciences* **108**, 268–278 (2019).
5. Brown, H. S., Griffin, M. & Houston, J. B. Evaluation of cryopreserved human hepatocytes as an alternative in vitro system to microsomes for the prediction of metabolic clearance. *Drug Metabolism and Disposition* **35**, 293–301 (2007).
6. Capon, D. A. *et al.* The influence of CYP2D6 polymorphism and quinidine on the disposition and antitussive effect of dextromethorphan in humans. *Clinical pharmacology and therapeutics* **60**, 295–307 (Sept. 1996).
7. Duedahl, T. H. *et al.* Intravenous dextromethorphan to human volunteers: relationship between pharmacokinetics and anti-hyperalgesic effect. *Pain* **113**, 360–8 (Feb. 2005).
8. Dumond, J. B. *et al.* A phenotype-genotype approach to predicting CYP450 and P-glycoprotein drug interactions with the mixed inhibitor/inducer tipranavir/ritonavir. *Clinical pharmacology and therapeutics* **87**, 735–42 (June 2010).
9. Edwards, J. E., Eliot, L., Parkinson, A., Karan, S. & MacConell, L. Assessment of Pharmacokinetic Interactions Between Obeticholic Acid and Caffeine, Midazolam, Warfarin, Dextromethorphan, Omeprazole, Rosuvastatin, and Digoxin in Phase 1 Studies in Healthy Subjects. *Advances in therapy* **34**, 2120–2138 (2017).
10. Ermer, J., Corcoran, M. & Martin, P. Lisdexamfetamine dimesylate effects on the pharmacokinetics of cytochrome P450 substrates in healthy adults in an open-label, randomized, crossover study. *Drugs in R and D* **15**, 175–185 (2015).
11. Feld, R. *et al.* A clinical investigation of inhibitory effect of panobinostat on CYP2D6 substrate in patients with advanced cancer. *Cancer chemotherapy and pharmacology* **72**, 747–55 (Oct. 2013).
12. Frank, D. *Bewertung von pharmakokinetischen Parametern zur Phänotypisierung des menschlichen Cytochrom P450 Enzyms CYP2D6 mittels Dextromethorphan* PhD thesis (Rheinische Friedrich-Wilhelms-Universität Bonn, 2009).
13. Gazzaz, M. *et al.* Drinking Ethanol Has Few Acute Effects on CYP2C9, CYP2C19, NAT2, and P-Glycoprotein Activities but Somewhat Inhibits CYP1A2, CYP2D6, and Intestinal CYP3A: So What? *Clinical Pharmacology & Therapeutics* **104**, 1249–1259 (Dec. 2018).
14. Gorski, J. C. *et al.* The effect of echinacea (*Echinacea purpurea* root) on cytochrome P450 activity in vivo. *Clinical pharmacology and therapeutics* **75**, 89–100 (Jan. 2004).
15. Guest, E. J., Aarons, L., Houston, J. B., Rostami-Hodjegan, A. & Galetin, A. Critique of the two-fold measure of prediction success for ratios: application for the assessment of drug-drug interactions. *Drug metabolism and disposition: the biological fate of chemicals* **39**, 170–3 (Feb. 2011).

16. *Human Metabolome Database: Showing metabocard for Dextrorphan (HMDB0060552)*
17. *Human Metabolome Database: Showing metabocard for Dextrorphan O-glucuronide (HMDB0010341)*
18. Kakuda, T. N. *et al.* The effect of single- and multiple-dose etravirine on a drug cocktail of representative cytochrome P450 probes and digoxin in healthy subjects. *Journal of clinical pharmacology* **54**, 422–31 (Apr. 2014).
19. Kawai, R. *et al.* Physiologically based pharmacokinetic study on a cyclosporin derivative, SDZ IMM 125. *Journal of pharmacokinetics and biopharmaceutics* **22**, 327–65 (Oct. 1994).
20. Kazmi, F. *et al.* Lysosomal sequestration (trapping) of lipophilic amine (cationic amphiphilic) drugs in immortalized human hepatocytes (Fa2N-4 cells). *Drug Metabolism and Disposition* **41**, 897–905 (2013).
21. Khalilieh, S. *et al.* Effect of tildrakizumab (MK-3222), a high affinity, selective anti-IL23p19 monoclonal antibody, on cytochrome P450 metabolism in subjects with moderate to severe psoriasis. *British journal of clinical pharmacology* **84**, 2292–2302 (2018).
22. Kim, S. *et al.* PubChem 2019 update: Improved access to chemical data. *Nucleic Acids Research* **47**, D1102–D1109 (2019).
23. Langenbucher, F. Linearization of dissolution rate curves by the Weibull distribution. *The Journal of pharmacy and pharmacology* **24**, 979–81 (Dec. 1972).
24. LLC, A. B. I. *US9370513B2 - Compositions and methods for increasing the metabolic lifetime of dextromethorphan and related pharmacodynamic effects* 2016.
25. Lutz, J. D. & Isoherranen, N. Prediction of relative in vivo metabolite exposure from in vitro data using two model drugs: Dextromethorphan and omeprazole. *Drug Metabolism and Disposition* **40**, 159–168 (2012).
26. Nakashima, D. *et al.* Effect of cinacalcet hydrochloride, a new calcimimetic agent, on the pharmacokinetics of dextromethorphan: in vitro and clinical studies. *Journal of clinical pharmacology* **47**, 1311–9 (Oct. 2007).
27. National Center for Health Statistics Hyattsville MD 20782. *Third National Health and Nutrition Examination Survey, (NHANES III)* tech. rep. (1997).
28. Nyunt, M. M. *et al.* Pharmacokinetic effect of AMD070, an Oral CXCR4 antagonist, on CYP3A4 and CYP2D6 substrates midazolam and dextromethorphan in healthy volunteers. *Journal of acquired immune deficiency syndromes (1999)* **47**, 559–65 (Apr. 2008).
29. Open Systems Pharmacology Suite Community. PK-Sim<sup>®</sup> Ontogeny Database Documentation, Version 7.3 (2018).
30. Qiu, F. *et al.* Effects of the Chinese herbal formula “Zuojin Pill” on the pharmacokinetics of dextromethorphan in healthy Chinese volunteers with CYP2D6\*10 genotype. *European Journal of Clinical Pharmacology* **72**, 689–695 (June 2016).
31. Sager, J. E. *et al.* Fluoxetine- and norfluoxetine-mediated complex drug-drug interactions: in vitro to in vivo correlation of effects on CYP2D6, CYP2C19, and CYP3A4. *Clinical pharmacology and therapeutics* **95**, 653–62. arXiv: NIHMS150003 (June 2014).
32. Schadel, M., Wu, D., Otton, S. V., Kalow, W. & Sellers, E. M. Pharmacokinetics of dextromethorphan and metabolites in humans: influence of the CYP2D6 phenotype and quinidine inhibition. *Journal of clinical psychopharmacology* **15**, 263–9 (Aug. 1995).
33. Schmitt, W. General approach for the calculation of tissue to plasma partition coefficients. *Toxicology in vitro : an international journal published in association with BIBRA* **22**, 457–67 (Mar. 2008).

34. Spaggiari, D. *et al.* Comparison of liquid chromatography and supercritical fluid chromatography coupled to compact single quadrupole mass spectrometer for targeted in vitro metabolism assay. *Journal of Chromatography A* **1371**, 244–256 (2014).
35. Stage, T. B. *et al.* Dicloxacillin induces CYP2C19, CYP2C9 and CYP3A4 in vivo and in vitro. *British journal of clinical pharmacology* **84**, 510–519 (Mar. 2018).
36. Storelli, F., Desmeules, J. & Daali, Y. Physiologically-Based Pharmacokinetic Modeling for the Prediction of CYP2D6-Mediated Gene–Drug–Drug Interactions. *CPT: Pharmacometrics & Systems Pharmacology*, psp4.12411 (2019).
37. Storelli, F. *et al.* Impact of CYP2D6 Functional Allelic Variations on Phenoconversion and Drug–Drug Interactions. *Clinical pharmacology and therapeutics* **104**, 148–157 (2018).
38. Tanaka, G. & Kawamura, H. Anatomical and physiological characteristics for Asian reference man: male and female of different ages: Tanaka model. Division of Radioecology, National Institute of Radiological Sciences. Hitachinaka 311-12 Japan. NIRS-M-115 (1996).
39. Tennezé, L. *et al.* Assessment of CYP2D6 and CYP2C19 activity in vivo in humans: a cocktail study with dextromethorphan and chloroguanide alone and in combination. *Clinical pharmacology and therapeutics* **66**, 582–8 (Dec. 1999).
40. Thelen, K. *et al.* Evolution of a detailed physiological model to simulate the gastrointestinal transit and absorption process in humans, Part 1: Oral solutions. *Journal of Pharmaceutical Sciences* **100**, 5324–5345 (Dec. 2011).
41. Valentin, J. Basic anatomical and physiological data for use in radiological protection: reference values. A report of age- and gender-related differences in the anatomical and physiological characteristics of reference individuals. ICRP Publication 89. *Annals of the ICRP* **32**, 5–265 (2002).
42. Watanabe, R. *et al.* Predicting Fraction Unbound in Human Plasma from Chemical Structure: Improved Accuracy in the Low Value Ranges. *Molecular Pharmaceutics* **15**, 5302–5311 (2018).
43. Wishart, D. S. *et al.* HMDB 4.0: the human metabolome database for 2018. *Nucleic Acids Research* **46**, D608–D617 (Jan. 2018).
44. Yamazaki, T. *et al.* Pharmacokinetic Effects of Isavuconazole Coadministration With the Cytochrome P450 Enzyme Substrates Bupropion, Repaglinide, Caffeine, Dextromethorphan, and Methadone in Healthy Subjects. *Clinical Pharmacology in Drug Development* **6**, 54–65 (2017).
45. Zawertailo, L. A., Tyndale, R. F., Busto, U. & Sellers, E. M. Effect of metabolic blockade on the psychoactive effects of dextromethorphan. *Human psychopharmacology* **25**, 71–9 (Jan. 2010).
